# Supplementary material for: Higher Phytohormone Contents and Weaker Phytohormone Signal Transduction Were Observed in Cold-Tolerant Cucumber
Source: Plants (Basel). 2022 Apr 1;11(7):961. doi: 10.3390/plants11070961 (PMC9003209; doi:10.3390/plants11070961)
Supplement: Supplementary file 1 [file plants-11-00961-s001.zip › Supplementary Materials Tables.xlsx]

## Sheet: Table S1
Table S1. Cold tolerance of cucumber inbred lines.
Accession name	Origination	Cold injury index	Cold tolerance
CT1	Spain	0.71	LR
CT2	Hungary	1	S
CT3	Hungary	0.93	S
CT4	Spain	0.66	LR
CT5	Egypt	0.52	MR
CT6	India	0.7	LR
CT7	India	0.75	LR
CT8	India	0.44	MR
CT9	USA	1	S
CT10	USA	0.73	LR
CT11	USA	0.69	LR
CT12	Russia	0.72	LR
CT13	Russia	0.61	LR
CT14	Ethiopia	0.42	MR
CT15	Oman	0.09	HR
CT16	Germany	0.42	MR
CT17	Hunan, China	0.45	MR
CT18	Hunan, China	0.29	R
CT19	Henan, China	0.86	S
CT20	Hebei, China	0.32	R
CT21	Hebei, China	0.85	S
CT22	Hebei, China	0.83	S
CT23	Shanxi, China	0.86	S
CT24	Sichuan, china	0.83	S
CT25	Sichuan, china	0.36	R
CT26	Shandong, China	0.43	R
CT27	Beijing, China	0.32	R
CT28	Xinjiang, China	0.13	HR
CT29	Jilin, China	0.48	MR
CT30	Henan, China	0.25	R
CT31	Jilin, China	0.46	MR
CT32	Jilin, China	0.63	LR
CT33	Henan, China	0.63	LR
CT34	Shandong, China	0.03	HR
CT35	Jilin, China	0.53	MR
CT36	Guizhou, China	0.35	R
CT37	Fujian, China	0.48	MR
CT38	Shandong, China	1	S
CT39	Guangdong, China	0.25	R
CT40	Henan, China	0.8	S
CT41	Hubei, China	0.52	MR
CT42	Hubei, China	0.85	S
CT43	Shandong, China	0.56	MR
CT44	Shandong, China	0.78	S
CT45	Inner Mongolia, China	0.79	S
CT46	Heilongjiang, China	0.84	S
CT47	Sichuan, china	0.83	S
CT48	Jilin, China	0.2	HR
CT49	Hebei, China	0.2	HR
CT50	Anhui, China	0.44	MR
CT51	Henan, China	0.31	R
CT52	Hubei, China	0.91	S
CT53	Guizhou, China	1	S
CT54	Yunnan, China	0.5	MR
CT55	Yunnan, China	0.36	R
CT56	Hubei, China	0.63	LR
CT57	Liaoning, China	0.38	R
CT58	Hubei, China	0.83	S
CT59	Jilin, China	0.68	MR
CT60	Sichuan, china	0.46	R
CT61	Sichuan, china	0.6	R
CT62	Liaoning, China	0.32	R
CT63	Jiangsu, China	0.42	MR
CT64	Taiwan, China	0.8	S
CT65	Sichuan, china	0.58	MR
CT66	USA	1	S
CT67	Sichuan, china	0.14	HR
CT68	Sichuan, china	0.46	MR
CT69	Sichuan, china	0.75	LR
CT70	Hebei, China	0.21	R
CT71	Sichuan, china	0.21	R
CT72	India	0.78	LR
CT73	Japan	0.34	MR
CT74	Japan	0.55	MR
CT75	Russia	0.83	S
CT76	USA	0.41	MR
CT77	India	1	S
CT78	India	1	S
CT79	Japan	0.4	R
CT80	Netherlands	0.98	S
CT81	India	0.89	S
CT82	India	1	S
CT83	Jilin, China	0.9	S
CT84	Tianjin, China	0.14	HR
CT85	Hunan, China	0.73	LR
CT86	Hungary	0.41	MR
CT87	Russia	0.5	MR
CT88	Puerto Rico	0.85	S
CT89	Syria	0.36	R
CT90	Sichuan, china	0.96	S
CT91	Hungary	0.69	LR
CT92	Sichuan, china	0.18	HR
CT93	Sichuan, china	0.31	R
CT94	Sichuan, china	0.73	LR
CT95	Sichuan, china	1	S
CT96	Sichuan, china	0.58	LR
CT97	Guangdong, China	0.46	MR
CT98	Shandong, China	0.15	HR
CT99	Jiangsu, China	0.36	R
CT100	Yunnan, China	0.28	R
CT101	Henan, China	0.28	R
CT102	Liaoning, China	0.19	HR
CT103	Japan	0.58	MR
CT104	India	0.61	LR
CT105	Jilin, China	0.65	LR
CT106	Sichuan, China	0.66	LR
CT107	Jilin, China	0.71	LR
CT108	Hebei, China	0.19	HR
CT109	Shangdong, China	0.11	HR
CT110	Hungary	0.77	LR
CT111	Turkey, Kayseri	0.64	LR
CT112	China, Shanxi	0.81	S
CT113	Sichuan, China	0.23	R
CT114	Sichuan, China	0.65	LR
CT115	Sichuan, China	0.36	R
S, cold sensitive; LR, low tolerance to cold; MR, moderate tolerance to cold; R, cold resistance; HR, high resistance to cold

## Sheet: Table S2
Table S2. Data of RNA-seq.
Sample	Size/G	Clean Reads	Mapped Reads	Uniq Mapped Reads	Ratio of reads mapping to exon
CS-L1	2.8	42330654	40,997,195 (96.85%)	39,783,728 (93.98%)	85.66
CS-L2	2.9	43509686	42,177,090 (96.94%)	40,998,401 (94.23%)	85.81
CS-L3	2.8	40969892	39,580,425 (96.61%)	38,269,997 (93.41%)	85.15
CS-R1	2.9	42682048	41,533,531 (97.31%)	40,234,892 (94.27%)	86.33
CS-R2	2.8	41685096	40,622,394 (97.45%)	39,357,607 (94.42%)	86.61
CS-R3	2.9	41950658	40,631,559 (96.86%)	39,306,408 (93.70%)	86.47
CT-L1	3.7	55910520	53,941,791 (96.48%)	52,368,937 (93.67%)	87.61
CT-L2	2.9	43693620	42,533,917 (97.35%)	41,329,627 (94.59%)	87.49
CT-L3	3.1	45956736	44,083,383 (95.92%)	42,824,231 (93.18%)	87.97
CT-R1	2.9	43987860	42,953,276 (97.65%)	41,560,049 (94.48%)	87.57
CT-R2	3	44407710	43,333,687 (97.58%)	41,914,175 (94.38%)	87.7
CT-R3	2.8	42099536	41,083,216 (97.59%)	39,765,001 (94.45%)	87.85

## Sheet: Table S3
Table S3. New genes identified in transcriptome assemblies.
Seq_ID	Source	Type	Start	End	Strand	Attributes
chr1	StringTie	gene	265591	267014	-	ID=Cucumis_sativus_newGene_1449
chr1	StringTie	mRNA	265591	267014	-	ID=Cucumis_sativus_newGene_1449.1;Parent=Cucumis_sativus_newGene_1449
chr1	StringTie	exon	265591	266305	-	Parent=Cucumis_sativus_newGene_1449.1
chr1	StringTie	mRNA	265623	267014	-	ID=Cucumis_sativus_newGene_1449.2;Parent=Cucumis_sativus_newGene_1449
chr1	StringTie	exon	265623	266294	-	Parent=Cucumis_sativus_newGene_1449.2
chr1	StringTie	mRNA	265648	267014	-	ID=Cucumis_sativus_newGene_1449.3;Parent=Cucumis_sativus_newGene_1449
chr1	StringTie	exon	265648	266206	-	Parent=Cucumis_sativus_newGene_1449.3
chr1	StringTie	mRNA	265726	267014	-	ID=Cucumis_sativus_newGene_1449.4;Parent=Cucumis_sativus_newGene_1449
chr1	StringTie	exon	265726	266294	-	Parent=Cucumis_sativus_newGene_1449.4
chr1	StringTie	mRNA	265745	267014	-	ID=Cucumis_sativus_newGene_1449.5;Parent=Cucumis_sativus_newGene_1449
chr1	StringTie	exon	265745	266294	-	Parent=Cucumis_sativus_newGene_1449.5
chr1	StringTie	exon	266371	267014	-	Parent=Cucumis_sativus_newGene_1449.4
chr1	StringTie	exon	266371	266462	-	Parent=Cucumis_sativus_newGene_1449.5
chr1	StringTie	exon	266764	267014	-	Parent=Cucumis_sativus_newGene_1449.1
chr1	StringTie	exon	266764	267014	-	Parent=Cucumis_sativus_newGene_1449.2
chr1	StringTie	exon	266764	267014	-	Parent=Cucumis_sativus_newGene_1449.3
chr1	StringTie	exon	266764	267014	-	Parent=Cucumis_sativus_newGene_1449.5
chr1	StringTie	gene	373426	373913	-	ID=Cucumis_sativus_newGene_1620
chr1	StringTie	mRNA	373426	373913	-	ID=Cucumis_sativus_newGene_1620.1;Parent=Cucumis_sativus_newGene_1620
chr1	StringTie	exon	373426	373566	-	Parent=Cucumis_sativus_newGene_1620.1
chr1	StringTie	exon	373709	373913	-	Parent=Cucumis_sativus_newGene_1620.1
chr1	StringTie	gene	414605	416950	-	ID=Cucumis_sativus_newGene_1654
chr1	StringTie	mRNA	414605	416950	-	ID=Cucumis_sativus_newGene_1654.1;Parent=Cucumis_sativus_newGene_1654
chr1	StringTie	exon	414605	415104	-	Parent=Cucumis_sativus_newGene_1654.1
chr1	StringTie	mRNA	414644	415834	-	ID=Cucumis_sativus_newGene_1654.2;Parent=Cucumis_sativus_newGene_1654
chr1	StringTie	exon	414644	415104	-	Parent=Cucumis_sativus_newGene_1654.2
chr1	StringTie	mRNA	414645	416950	-	ID=Cucumis_sativus_newGene_1654.3;Parent=Cucumis_sativus_newGene_1654
chr1	StringTie	exon	414645	414942	-	Parent=Cucumis_sativus_newGene_1654.3
chr1	StringTie	mRNA	414752	416950	-	ID=Cucumis_sativus_newGene_1654.4;Parent=Cucumis_sativus_newGene_1654
chr1	StringTie	exon	414752	414942	-	Parent=Cucumis_sativus_newGene_1654.4
chr1	StringTie	exon	415033	415104	-	Parent=Cucumis_sativus_newGene_1654.3
chr1	StringTie	exon	415033	416950	-	Parent=Cucumis_sativus_newGene_1654.4
chr1	StringTie	exon	415202	415834	-	Parent=Cucumis_sativus_newGene_1654.2
chr1	StringTie	mRNA	415835	416950	-	ID=Cucumis_sativus_newGene_1654.5;Parent=Cucumis_sativus_newGene_1654
chr1	StringTie	exon	415835	416520	-	Parent=Cucumis_sativus_newGene_1654.5
chr1	StringTie	exon	416117	416950	-	Parent=Cucumis_sativus_newGene_1654.3
chr1	StringTie	exon	416139	416255	-	Parent=Cucumis_sativus_newGene_1654.1
chr1	StringTie	exon	416421	416950	-	Parent=Cucumis_sativus_newGene_1654.1
chr1	StringTie	exon	416642	416950	-	Parent=Cucumis_sativus_newGene_1654.5
chr1	StringTie	gene	594493	595504	+	ID=Cucumis_sativus_newGene_1874
chr1	StringTie	mRNA	594493	595504	+	ID=Cucumis_sativus_newGene_1874.1;Parent=Cucumis_sativus_newGene_1874
chr1	StringTie	exon	594493	594921	+	Parent=Cucumis_sativus_newGene_1874.1
chr1	StringTie	exon	594944	595504	+	Parent=Cucumis_sativus_newGene_1874.1
chr1	StringTie	gene	707768	712294	-	ID=Cucumis_sativus_newGene_134
chr1	StringTie	mRNA	707768	712294	-	ID=Cucumis_sativus_newGene_134.1;Parent=Cucumis_sativus_newGene_134
chr1	StringTie	exon	707768	708084	-	Parent=Cucumis_sativus_newGene_134.1
chr1	StringTie	mRNA	707768	710245	-	ID=Cucumis_sativus_newGene_134.2;Parent=Cucumis_sativus_newGene_134
chr1	StringTie	exon	707768	708487	-	Parent=Cucumis_sativus_newGene_134.2
chr1	StringTie	mRNA	707768	710245	-	ID=Cucumis_sativus_newGene_134.3;Parent=Cucumis_sativus_newGene_134
chr1	StringTie	exon	707768	708084	-	Parent=Cucumis_sativus_newGene_134.3
chr1	StringTie	exon	708183	708487	-	Parent=Cucumis_sativus_newGene_134.1
chr1	StringTie	exon	708183	708487	-	Parent=Cucumis_sativus_newGene_134.3
chr1	StringTie	exon	708570	708850	-	Parent=Cucumis_sativus_newGene_134.1
chr1	StringTie	exon	708570	710245	-	Parent=Cucumis_sativus_newGene_134.2
chr1	StringTie	exon	708694	708850	-	Parent=Cucumis_sativus_newGene_134.3
chr1	StringTie	exon	709275	709578	-	Parent=Cucumis_sativus_newGene_134.1
chr1	StringTie	exon	709275	710245	-	Parent=Cucumis_sativus_newGene_134.3
chr1	StringTie	exon	711285	712294	-	Parent=Cucumis_sativus_newGene_134.1
chr1	StringTie	gene	1714709	1715242	-	ID=Cucumis_sativus_newGene_1324
chr1	StringTie	mRNA	1714709	1715242	-	ID=Cucumis_sativus_newGene_1324.1;Parent=Cucumis_sativus_newGene_1324
chr1	StringTie	exon	1714709	1715032	-	Parent=Cucumis_sativus_newGene_1324.1
chr1	StringTie	exon	1715118	1715242	-	Parent=Cucumis_sativus_newGene_1324.1
chr1	StringTie	gene	1864867	1868125	+	ID=Cucumis_sativus_newGene_1342
chr1	StringTie	mRNA	1864867	1868125	+	ID=Cucumis_sativus_newGene_1342.1;Parent=Cucumis_sativus_newGene_1342
chr1	StringTie	exon	1864867	1866616	+	Parent=Cucumis_sativus_newGene_1342.1
chr1	StringTie	mRNA	1864966	1868125	+	ID=Cucumis_sativus_newGene_1342.2;Parent=Cucumis_sativus_newGene_1342
chr1	StringTie	exon	1864966	1865154	+	Parent=Cucumis_sativus_newGene_1342.2
chr1	StringTie	mRNA	1864967	1868125	+	ID=Cucumis_sativus_newGene_1342.3;Parent=Cucumis_sativus_newGene_1342
chr1	StringTie	exon	1864967	1865154	+	Parent=Cucumis_sativus_newGene_1342.3
chr1	StringTie	mRNA	1864967	1868125	+	ID=Cucumis_sativus_newGene_1342.4;Parent=Cucumis_sativus_newGene_1342
chr1	StringTie	exon	1864967	1865154	+	Parent=Cucumis_sativus_newGene_1342.4
chr1	StringTie	mRNA	1864980	1868125	+	ID=Cucumis_sativus_newGene_1342.5;Parent=Cucumis_sativus_newGene_1342
chr1	StringTie	exon	1864980	1865154	+	Parent=Cucumis_sativus_newGene_1342.5
chr1	StringTie	exon	1865297	1868125	+	Parent=Cucumis_sativus_newGene_1342.4
chr1	StringTie	exon	1866444	1866616	+	Parent=Cucumis_sativus_newGene_1342.2
chr1	StringTie	exon	1866475	1866616	+	Parent=Cucumis_sativus_newGene_1342.5
chr1	StringTie	exon	1867656	1868125	+	Parent=Cucumis_sativus_newGene_1342.1
chr1	StringTie	exon	1867656	1868125	+	Parent=Cucumis_sativus_newGene_1342.2
chr1	StringTie	exon	1867656	1868125	+	Parent=Cucumis_sativus_newGene_1342.3
chr1	StringTie	exon	1867656	1868125	+	Parent=Cucumis_sativus_newGene_1342.5
chr1	StringTie	gene	1937975	1939455	+	ID=Cucumis_sativus_newGene_1353
chr1	StringTie	mRNA	1937975	1939455	+	ID=Cucumis_sativus_newGene_1353.1;Parent=Cucumis_sativus_newGene_1353
chr1	StringTie	exon	1937975	1938208	+	Parent=Cucumis_sativus_newGene_1353.1
chr1	StringTie	mRNA	1937998	1939455	+	ID=Cucumis_sativus_newGene_1353.2;Parent=Cucumis_sativus_newGene_1353
chr1	StringTie	exon	1937998	1938208	+	Parent=Cucumis_sativus_newGene_1353.2
chr1	StringTie	exon	1938365	1939455	+	Parent=Cucumis_sativus_newGene_1353.1
chr1	StringTie	exon	1938418	1939455	+	Parent=Cucumis_sativus_newGene_1353.2
chr1	StringTie	gene	2410262	2411508	+	ID=Cucumis_sativus_newGene_1402
chr1	StringTie	mRNA	2410262	2411508	+	ID=Cucumis_sativus_newGene_1402.1;Parent=Cucumis_sativus_newGene_1402
chr1	StringTie	exon	2410262	2410389	+	Parent=Cucumis_sativus_newGene_1402.1
chr1	StringTie	exon	2410551	2410776	+	Parent=Cucumis_sativus_newGene_1402.1
chr1	StringTie	exon	2410938	2411508	+	Parent=Cucumis_sativus_newGene_1402.1
chr1	StringTie	gene	2547575	2549321	+	ID=Cucumis_sativus_newGene_1413
chr1	StringTie	mRNA	2547575	2549321	+	ID=Cucumis_sativus_newGene_1413.1;Parent=Cucumis_sativus_newGene_1413
chr1	StringTie	exon	2547575	2548238	+	Parent=Cucumis_sativus_newGene_1413.1
chr1	StringTie	mRNA	2547575	2549321	+	ID=Cucumis_sativus_newGene_1413.2;Parent=Cucumis_sativus_newGene_1413
chr1	StringTie	exon	2547575	2548238	+	Parent=Cucumis_sativus_newGene_1413.2
chr1	StringTie	mRNA	2547580	2549321	+	ID=Cucumis_sativus_newGene_1413.3;Parent=Cucumis_sativus_newGene_1413
chr1	StringTie	exon	2547580	2548243	+	Parent=Cucumis_sativus_newGene_1413.3
chr1	StringTie	exon	2548584	2549321	+	Parent=Cucumis_sativus_newGene_1413.1
chr1	StringTie	exon	2548584	2549321	+	Parent=Cucumis_sativus_newGene_1413.3
chr1	StringTie	exon	2548591	2549321	+	Parent=Cucumis_sativus_newGene_1413.2
chr1	StringTie	gene	2609504	2613773	-	ID=Cucumis_sativus_newGene_1421
chr1	StringTie	mRNA	2609504	2613773	-	ID=Cucumis_sativus_newGene_1421.1;Parent=Cucumis_sativus_newGene_1421
chr1	StringTie	exon	2609504	2610103	-	Parent=Cucumis_sativus_newGene_1421.1
chr1	StringTie	mRNA	2609504	2613773	-	ID=Cucumis_sativus_newGene_1421.2;Parent=Cucumis_sativus_newGene_1421
chr1	StringTie	exon	2609504	2610103	-	Parent=Cucumis_sativus_newGene_1421.2
chr1	StringTie	mRNA	2609765	2613773	-	ID=Cucumis_sativus_newGene_1421.3;Parent=Cucumis_sativus_newGene_1421
chr1	StringTie	exon	2609765	2610103	-	Parent=Cucumis_sativus_newGene_1421.3
chr1	StringTie	mRNA	2609773	2613773	-	ID=Cucumis_sativus_newGene_1421.4;Parent=Cucumis_sativus_newGene_1421
chr1	StringTie	exon	2609773	2610103	-	Parent=Cucumis_sativus_newGene_1421.4
chr1	StringTie	mRNA	2609787	2613773	-	ID=Cucumis_sativus_newGene_1421.5;Parent=Cucumis_sativus_newGene_1421
chr1	StringTie	exon	2609787	2610103	-	Parent=Cucumis_sativus_newGene_1421.5
chr1	StringTie	exon	2610188	2610274	-	Parent=Cucumis_sativus_newGene_1421.1
chr1	StringTie	exon	2610188	2610274	-	Parent=Cucumis_sativus_newGene_1421.2
chr1	StringTie	exon	2610188	2610274	-	Parent=Cucumis_sativus_newGene_1421.3
chr1	StringTie	exon	2610188	2610274	-	Parent=Cucumis_sativus_newGene_1421.4
chr1	StringTie	exon	2610188	2610274	-	Parent=Cucumis_sativus_newGene_1421.5
chr1	StringTie	exon	2610539	2610657	-	Parent=Cucumis_sativus_newGene_1421.1
chr1	StringTie	exon	2610539	2610657	-	Parent=Cucumis_sativus_newGene_1421.2
chr1	StringTie	exon	2610539	2610657	-	Parent=Cucumis_sativus_newGene_1421.3
chr1	StringTie	exon	2610539	2610657	-	Parent=Cucumis_sativus_newGene_1421.4
chr1	StringTie	exon	2610539	2610657	-	Parent=Cucumis_sativus_newGene_1421.5
chr1	StringTie	mRNA	2610884	2613773	-	ID=Cucumis_sativus_newGene_1421.6;Parent=Cucumis_sativus_newGene_1421
chr1	StringTie	exon	2610884	2611838	-	Parent=Cucumis_sativus_newGene_1421.6
chr1	StringTie	exon	2611179	2611417	-	Parent=Cucumis_sativus_newGene_1421.1
chr1	StringTie	exon	2611179	2611417	-	Parent=Cucumis_sativus_newGene_1421.2
chr1	StringTie	exon	2611179	2611270	-	Parent=Cucumis_sativus_newGene_1421.3
chr1	StringTie	exon	2611200	2611417	-	Parent=Cucumis_sativus_newGene_1421.4
chr1	StringTie	exon	2611342	2611417	-	Parent=Cucumis_sativus_newGene_1421.3
chr1	StringTie	exon	2611361	2611417	-	Parent=Cucumis_sativus_newGene_1421.5
chr1	StringTie	exon	2611616	2611672	-	Parent=Cucumis_sativus_newGene_1421.1
chr1	StringTie	exon	2611616	2611672	-	Parent=Cucumis_sativus_newGene_1421.3
chr1	StringTie	exon	2611616	2611672	-	Parent=Cucumis_sativus_newGene_1421.5
chr1	StringTie	exon	2611752	2611838	-	Parent=Cucumis_sativus_newGene_1421.1
chr1	StringTie	exon	2611752	2611838	-	Parent=Cucumis_sativus_newGene_1421.2
chr1	StringTie	exon	2611752	2611838	-	Parent=Cucumis_sativus_newGene_1421.3
chr1	StringTie	exon	2611752	2611838	-	Parent=Cucumis_sativus_newGene_1421.4
chr1	StringTie	exon	2611752	2611838	-	Parent=Cucumis_sativus_newGene_1421.5
chr1	StringTie	exon	2611929	2612473	-	Parent=Cucumis_sativus_newGene_1421.1
chr1	StringTie	exon	2611929	2612473	-	Parent=Cucumis_sativus_newGene_1421.2
chr1	StringTie	exon	2611929	2612473	-	Parent=Cucumis_sativus_newGene_1421.3
chr1	StringTie	exon	2611929	2612473	-	Parent=Cucumis_sativus_newGene_1421.4
chr1	StringTie	exon	2611929	2612473	-	Parent=Cucumis_sativus_newGene_1421.5
chr1	StringTie	exon	2611929	2612473	-	Parent=Cucumis_sativus_newGene_1421.6
chr1	StringTie	exon	2612587	2613773	-	Parent=Cucumis_sativus_newGene_1421.1
chr1	StringTie	exon	2612587	2613773	-	Parent=Cucumis_sativus_newGene_1421.2
chr1	StringTie	exon	2612587	2613773	-	Parent=Cucumis_sativus_newGene_1421.3
chr1	StringTie	exon	2612587	2613773	-	Parent=Cucumis_sativus_newGene_1421.4
chr1	StringTie	exon	2612587	2613773	-	Parent=Cucumis_sativus_newGene_1421.5
chr1	StringTie	exon	2612587	2613773	-	Parent=Cucumis_sativus_newGene_1421.6
chr1	StringTie	gene	2613860	2619561	-	ID=Cucumis_sativus_newGene_1423
chr1	StringTie	mRNA	2613860	2619561	-	ID=Cucumis_sativus_newGene_1423.1;Parent=Cucumis_sativus_newGene_1423
chr1	StringTie	exon	2613860	2614702	-	Parent=Cucumis_sativus_newGene_1423.1
chr1	StringTie	exon	2614787	2614873	-	Parent=Cucumis_sativus_newGene_1423.1
chr1	StringTie	exon	2615301	2615419	-	Parent=Cucumis_sativus_newGene_1423.1
chr1	StringTie	exon	2616938	2617176	-	Parent=Cucumis_sativus_newGene_1423.1
chr1	StringTie	exon	2617369	2617425	-	Parent=Cucumis_sativus_newGene_1423.1
chr1	StringTie	exon	2617501	2617587	-	Parent=Cucumis_sativus_newGene_1423.1
chr1	StringTie	exon	2617689	2618233	-	Parent=Cucumis_sativus_newGene_1423.1
chr1	StringTie	exon	2618828	2619561	-	Parent=Cucumis_sativus_newGene_1423.1
chr1	StringTie	gene	3849754	3852163	-	ID=Cucumis_sativus_newGene_1568
chr1	StringTie	mRNA	3849754	3852163	-	ID=Cucumis_sativus_newGene_1568.1;Parent=Cucumis_sativus_newGene_1568
chr1	StringTie	exon	3849754	3850414	-	Parent=Cucumis_sativus_newGene_1568.1
chr1	StringTie	exon	3850472	3850591	-	Parent=Cucumis_sativus_newGene_1568.1
chr1	StringTie	exon	3850703	3850809	-	Parent=Cucumis_sativus_newGene_1568.1
chr1	StringTie	exon	3850990	3851058	-	Parent=Cucumis_sativus_newGene_1568.1
chr1	StringTie	exon	3851147	3851294	-	Parent=Cucumis_sativus_newGene_1568.1
chr1	StringTie	exon	3851953	3852163	-	Parent=Cucumis_sativus_newGene_1568.1
chr1	StringTie	gene	4183036	4186023	-	ID=Cucumis_sativus_newGene_1587
chr1	StringTie	mRNA	4183036	4186023	-	ID=Cucumis_sativus_newGene_1587.1;Parent=Cucumis_sativus_newGene_1587
chr1	StringTie	exon	4183036	4183084	-	Parent=Cucumis_sativus_newGene_1587.1
chr1	StringTie	exon	4184788	4185057	-	Parent=Cucumis_sativus_newGene_1587.1
chr1	StringTie	exon	4185155	4185232	-	Parent=Cucumis_sativus_newGene_1587.1
chr1	StringTie	exon	4185313	4186023	-	Parent=Cucumis_sativus_newGene_1587.1
chr1	StringTie	gene	4356881	4357805	-	ID=Cucumis_sativus_newGene_1616
chr1	StringTie	mRNA	4356881	4357805	-	ID=Cucumis_sativus_newGene_1616.1;Parent=Cucumis_sativus_newGene_1616
chr1	StringTie	exon	4356881	4357540	-	Parent=Cucumis_sativus_newGene_1616.1
chr1	StringTie	exon	4357687	4357805	-	Parent=Cucumis_sativus_newGene_1616.1
chr1	StringTie	gene	4723449	4727786	+	ID=Cucumis_sativus_newGene_1643
chr1	StringTie	mRNA	4723449	4727786	+	ID=Cucumis_sativus_newGene_1643.1;Parent=Cucumis_sativus_newGene_1643
chr1	StringTie	exon	4723449	4723544	+	Parent=Cucumis_sativus_newGene_1643.1
chr1	StringTie	exon	4724938	4725005	+	Parent=Cucumis_sativus_newGene_1643.1
chr1	StringTie	exon	4725593	4725741	+	Parent=Cucumis_sativus_newGene_1643.1
chr1	StringTie	exon	4725835	4725891	+	Parent=Cucumis_sativus_newGene_1643.1
chr1	StringTie	exon	4727073	4727111	+	Parent=Cucumis_sativus_newGene_1643.1
chr1	StringTie	exon	4727195	4727786	+	Parent=Cucumis_sativus_newGene_1643.1
chr1	StringTie	gene	5531680	5533201	-	ID=Cucumis_sativus_newGene_1715
chr1	StringTie	mRNA	5531680	5533201	-	ID=Cucumis_sativus_newGene_1715.1;Parent=Cucumis_sativus_newGene_1715
chr1	StringTie	exon	5531680	5531758	-	Parent=Cucumis_sativus_newGene_1715.1
chr1	StringTie	exon	5531896	5532039	-	Parent=Cucumis_sativus_newGene_1715.1
chr1	StringTie	exon	5532212	5532283	-	Parent=Cucumis_sativus_newGene_1715.1
chr1	StringTie	exon	5532388	5532520	-	Parent=Cucumis_sativus_newGene_1715.1
chr1	StringTie	exon	5532643	5532729	-	Parent=Cucumis_sativus_newGene_1715.1
chr1	StringTie	exon	5532833	5532913	-	Parent=Cucumis_sativus_newGene_1715.1
chr1	StringTie	exon	5533019	5533201	-	Parent=Cucumis_sativus_newGene_1715.1
chr1	StringTie	gene	5736163	5742869	+	ID=Cucumis_sativus_newGene_1767
chr1	StringTie	mRNA	5736163	5742869	+	ID=Cucumis_sativus_newGene_1767.1;Parent=Cucumis_sativus_newGene_1767
chr1	StringTie	exon	5736163	5736727	+	Parent=Cucumis_sativus_newGene_1767.1
chr1	StringTie	mRNA	5736370	5742869	+	ID=Cucumis_sativus_newGene_1767.2;Parent=Cucumis_sativus_newGene_1767
chr1	StringTie	exon	5736370	5736727	+	Parent=Cucumis_sativus_newGene_1767.2
chr1	StringTie	mRNA	5736372	5742869	+	ID=Cucumis_sativus_newGene_1767.3;Parent=Cucumis_sativus_newGene_1767
chr1	StringTie	exon	5736372	5736727	+	Parent=Cucumis_sativus_newGene_1767.3
chr1	StringTie	mRNA	5736414	5742869	+	ID=Cucumis_sativus_newGene_1767.4;Parent=Cucumis_sativus_newGene_1767
chr1	StringTie	exon	5736414	5736727	+	Parent=Cucumis_sativus_newGene_1767.4
chr1	StringTie	mRNA	5736464	5742869	+	ID=Cucumis_sativus_newGene_1767.5;Parent=Cucumis_sativus_newGene_1767
chr1	StringTie	exon	5736464	5736727	+	Parent=Cucumis_sativus_newGene_1767.5
chr1	StringTie	exon	5737826	5737918	+	Parent=Cucumis_sativus_newGene_1767.1
chr1	StringTie	exon	5737826	5737918	+	Parent=Cucumis_sativus_newGene_1767.2
chr1	StringTie	exon	5737826	5737918	+	Parent=Cucumis_sativus_newGene_1767.3
chr1	StringTie	exon	5737826	5737918	+	Parent=Cucumis_sativus_newGene_1767.4
chr1	StringTie	exon	5737826	5737918	+	Parent=Cucumis_sativus_newGene_1767.5
chr1	StringTie	exon	5738391	5738535	+	Parent=Cucumis_sativus_newGene_1767.1
chr1	StringTie	exon	5738391	5738535	+	Parent=Cucumis_sativus_newGene_1767.2
chr1	StringTie	exon	5738391	5738535	+	Parent=Cucumis_sativus_newGene_1767.3
chr1	StringTie	exon	5738391	5738535	+	Parent=Cucumis_sativus_newGene_1767.4
chr1	StringTie	exon	5738391	5738535	+	Parent=Cucumis_sativus_newGene_1767.5
chr1	StringTie	exon	5739060	5739261	+	Parent=Cucumis_sativus_newGene_1767.1
chr1	StringTie	exon	5739060	5739261	+	Parent=Cucumis_sativus_newGene_1767.2
chr1	StringTie	exon	5739060	5739261	+	Parent=Cucumis_sativus_newGene_1767.3
chr1	StringTie	exon	5739060	5739261	+	Parent=Cucumis_sativus_newGene_1767.4
chr1	StringTie	exon	5739060	5739261	+	Parent=Cucumis_sativus_newGene_1767.5
chr1	StringTie	exon	5739798	5739876	+	Parent=Cucumis_sativus_newGene_1767.1
chr1	StringTie	exon	5739798	5739876	+	Parent=Cucumis_sativus_newGene_1767.2
chr1	StringTie	exon	5739798	5740227	+	Parent=Cucumis_sativus_newGene_1767.3
chr1	StringTie	exon	5739798	5739876	+	Parent=Cucumis_sativus_newGene_1767.4
chr1	StringTie	exon	5739798	5739876	+	Parent=Cucumis_sativus_newGene_1767.5
chr1	StringTie	exon	5740363	5740424	+	Parent=Cucumis_sativus_newGene_1767.1
chr1	StringTie	exon	5740363	5740424	+	Parent=Cucumis_sativus_newGene_1767.2
chr1	StringTie	exon	5740363	5740424	+	Parent=Cucumis_sativus_newGene_1767.3
chr1	StringTie	exon	5740363	5740424	+	Parent=Cucumis_sativus_newGene_1767.5
chr1	StringTie	exon	5740766	5740852	+	Parent=Cucumis_sativus_newGene_1767.1
chr1	StringTie	exon	5740766	5740852	+	Parent=Cucumis_sativus_newGene_1767.3
chr1	StringTie	exon	5740766	5740852	+	Parent=Cucumis_sativus_newGene_1767.4
chr1	StringTie	exon	5740766	5740852	+	Parent=Cucumis_sativus_newGene_1767.5
chr1	StringTie	exon	5740780	5740852	+	Parent=Cucumis_sativus_newGene_1767.2
chr1	StringTie	exon	5741092	5741195	+	Parent=Cucumis_sativus_newGene_1767.1
chr1	StringTie	exon	5741092	5741195	+	Parent=Cucumis_sativus_newGene_1767.2
chr1	StringTie	exon	5741092	5741195	+	Parent=Cucumis_sativus_newGene_1767.3
chr1	StringTie	exon	5741092	5741195	+	Parent=Cucumis_sativus_newGene_1767.4
chr1	StringTie	exon	5741092	5741195	+	Parent=Cucumis_sativus_newGene_1767.5
chr1	StringTie	exon	5742117	5742208	+	Parent=Cucumis_sativus_newGene_1767.1
chr1	StringTie	exon	5742117	5742869	+	Parent=Cucumis_sativus_newGene_1767.2
chr1	StringTie	exon	5742117	5742869	+	Parent=Cucumis_sativus_newGene_1767.3
chr1	StringTie	exon	5742117	5742208	+	Parent=Cucumis_sativus_newGene_1767.4
chr1	StringTie	exon	5742117	5742208	+	Parent=Cucumis_sativus_newGene_1767.5
chr1	StringTie	exon	5742395	5742869	+	Parent=Cucumis_sativus_newGene_1767.1
chr1	StringTie	exon	5742395	5742869	+	Parent=Cucumis_sativus_newGene_1767.4
chr1	StringTie	exon	5742428	5742869	+	Parent=Cucumis_sativus_newGene_1767.5
chr1	StringTie	gene	6049366	6060236	+	ID=Cucumis_sativus_newGene_1837
chr1	StringTie	mRNA	6049366	6060236	+	ID=Cucumis_sativus_newGene_1837.1;Parent=Cucumis_sativus_newGene_1837
chr1	StringTie	exon	6049366	6049528	+	Parent=Cucumis_sativus_newGene_1837.1
chr1	StringTie	mRNA	6049366	6056674	+	ID=Cucumis_sativus_newGene_1837.2;Parent=Cucumis_sativus_newGene_1837
chr1	StringTie	exon	6049366	6049528	+	Parent=Cucumis_sativus_newGene_1837.2
chr1	StringTie	mRNA	6049366	6060236	+	ID=Cucumis_sativus_newGene_1837.3;Parent=Cucumis_sativus_newGene_1837
chr1	StringTie	exon	6049366	6049528	+	Parent=Cucumis_sativus_newGene_1837.3
chr1	StringTie	mRNA	6049366	6056674	+	ID=Cucumis_sativus_newGene_1837.4;Parent=Cucumis_sativus_newGene_1837
chr1	StringTie	exon	6049366	6049528	+	Parent=Cucumis_sativus_newGene_1837.4
chr1	StringTie	mRNA	6049366	6060236	+	ID=Cucumis_sativus_newGene_1837.5;Parent=Cucumis_sativus_newGene_1837
chr1	StringTie	exon	6049366	6049528	+	Parent=Cucumis_sativus_newGene_1837.5
chr1	StringTie	mRNA	6049378	6056674	+	ID=Cucumis_sativus_newGene_1837.6;Parent=Cucumis_sativus_newGene_1837
chr1	StringTie	exon	6049378	6049528	+	Parent=Cucumis_sativus_newGene_1837.6
chr1	StringTie	mRNA	6049385	6056674	+	ID=Cucumis_sativus_newGene_1837.7;Parent=Cucumis_sativus_newGene_1837
chr1	StringTie	exon	6049385	6049528	+	Parent=Cucumis_sativus_newGene_1837.7
chr1	StringTie	mRNA	6049399	6056674	+	ID=Cucumis_sativus_newGene_1837.8;Parent=Cucumis_sativus_newGene_1837
chr1	StringTie	exon	6049399	6049528	+	Parent=Cucumis_sativus_newGene_1837.8
chr1	StringTie	mRNA	6049414	6056674	+	ID=Cucumis_sativus_newGene_1837.9;Parent=Cucumis_sativus_newGene_1837
chr1	StringTie	exon	6049414	6049528	+	Parent=Cucumis_sativus_newGene_1837.9
chr1	StringTie	exon	6049940	6050105	+	Parent=Cucumis_sativus_newGene_1837.1
chr1	StringTie	exon	6049940	6050105	+	Parent=Cucumis_sativus_newGene_1837.2
chr1	StringTie	exon	6049940	6050105	+	Parent=Cucumis_sativus_newGene_1837.3
chr1	StringTie	exon	6049940	6050105	+	Parent=Cucumis_sativus_newGene_1837.4
chr1	StringTie	exon	6049940	6050105	+	Parent=Cucumis_sativus_newGene_1837.5
chr1	StringTie	exon	6049940	6050105	+	Parent=Cucumis_sativus_newGene_1837.6
chr1	StringTie	exon	6049940	6050105	+	Parent=Cucumis_sativus_newGene_1837.7
chr1	StringTie	exon	6049940	6050105	+	Parent=Cucumis_sativus_newGene_1837.8
chr1	StringTie	exon	6049940	6050105	+	Parent=Cucumis_sativus_newGene_1837.9
chr1	StringTie	exon	6054817	6054833	+	Parent=Cucumis_sativus_newGene_1837.3
chr1	StringTie	exon	6054817	6054833	+	Parent=Cucumis_sativus_newGene_1837.9
chr1	StringTie	exon	6055234	6055829	+	Parent=Cucumis_sativus_newGene_1837.1
chr1	StringTie	exon	6055234	6055829	+	Parent=Cucumis_sativus_newGene_1837.2
chr1	StringTie	exon	6055234	6055302	+	Parent=Cucumis_sativus_newGene_1837.3
chr1	StringTie	exon	6055234	6055302	+	Parent=Cucumis_sativus_newGene_1837.4
chr1	StringTie	exon	6055234	6055302	+	Parent=Cucumis_sativus_newGene_1837.5
chr1	StringTie	exon	6055234	6055302	+	Parent=Cucumis_sativus_newGene_1837.6
chr1	StringTie	exon	6055234	6055302	+	Parent=Cucumis_sativus_newGene_1837.7
chr1	StringTie	exon	6055234	6055302	+	Parent=Cucumis_sativus_newGene_1837.8
chr1	StringTie	exon	6055234	6055302	+	Parent=Cucumis_sativus_newGene_1837.9
chr1	StringTie	exon	6055390	6056674	+	Parent=Cucumis_sativus_newGene_1837.4
chr1	StringTie	exon	6055390	6055829	+	Parent=Cucumis_sativus_newGene_1837.6
chr1	StringTie	exon	6055390	6055829	+	Parent=Cucumis_sativus_newGene_1837.9
chr1	StringTie	exon	6055715	6056674	+	Parent=Cucumis_sativus_newGene_1837.8
chr1	StringTie	exon	6055763	6055829	+	Parent=Cucumis_sativus_newGene_1837.7
chr1	StringTie	exon	6056327	6056674	+	Parent=Cucumis_sativus_newGene_1837.2
chr1	StringTie	exon	6056327	6056674	+	Parent=Cucumis_sativus_newGene_1837.6
chr1	StringTie	exon	6056327	6056674	+	Parent=Cucumis_sativus_newGene_1837.7
chr1	StringTie	exon	6056327	6056674	+	Parent=Cucumis_sativus_newGene_1837.9
chr1	StringTie	exon	6059896	6060236	+	Parent=Cucumis_sativus_newGene_1837.1
chr1	StringTie	exon	6059896	6060236	+	Parent=Cucumis_sativus_newGene_1837.3
chr1	StringTie	exon	6059896	6060236	+	Parent=Cucumis_sativus_newGene_1837.5
chr1	StringTie	gene	6117673	6120001	-	ID=Cucumis_sativus_newGene_1842
chr1	StringTie	mRNA	6117673	6120001	-	ID=Cucumis_sativus_newGene_1842.1;Parent=Cucumis_sativus_newGene_1842
chr1	StringTie	exon	6117673	6118400	-	Parent=Cucumis_sativus_newGene_1842.1
chr1	StringTie	mRNA	6117673	6120001	-	ID=Cucumis_sativus_newGene_1842.2;Parent=Cucumis_sativus_newGene_1842
chr1	StringTie	exon	6117673	6118400	-	Parent=Cucumis_sativus_newGene_1842.2
chr1	StringTie	mRNA	6117673	6120001	-	ID=Cucumis_sativus_newGene_1842.3;Parent=Cucumis_sativus_newGene_1842
chr1	StringTie	exon	6117673	6118400	-	Parent=Cucumis_sativus_newGene_1842.3
chr1	StringTie	mRNA	6117673	6120001	-	ID=Cucumis_sativus_newGene_1842.4;Parent=Cucumis_sativus_newGene_1842
chr1	StringTie	exon	6117673	6118400	-	Parent=Cucumis_sativus_newGene_1842.4
chr1	StringTie	mRNA	6117677	6120001	-	ID=Cucumis_sativus_newGene_1842.5;Parent=Cucumis_sativus_newGene_1842
chr1	StringTie	exon	6117677	6118400	-	Parent=Cucumis_sativus_newGene_1842.5
chr1	StringTie	mRNA	6117726	6120001	-	ID=Cucumis_sativus_newGene_1842.6;Parent=Cucumis_sativus_newGene_1842
chr1	StringTie	exon	6117726	6118400	-	Parent=Cucumis_sativus_newGene_1842.6
chr1	StringTie	exon	6118777	6118896	-	Parent=Cucumis_sativus_newGene_1842.1
chr1	StringTie	exon	6118777	6118896	-	Parent=Cucumis_sativus_newGene_1842.2
chr1	StringTie	exon	6118777	6118896	-	Parent=Cucumis_sativus_newGene_1842.3
chr1	StringTie	exon	6118777	6118896	-	Parent=Cucumis_sativus_newGene_1842.4
chr1	StringTie	exon	6118777	6118896	-	Parent=Cucumis_sativus_newGene_1842.5
chr1	StringTie	exon	6118777	6118896	-	Parent=Cucumis_sativus_newGene_1842.6
chr1	StringTie	exon	6119071	6119232	-	Parent=Cucumis_sativus_newGene_1842.1
chr1	StringTie	exon	6119071	6119232	-	Parent=Cucumis_sativus_newGene_1842.2
chr1	StringTie	exon	6119071	6119232	-	Parent=Cucumis_sativus_newGene_1842.3
chr1	StringTie	exon	6119071	6119232	-	Parent=Cucumis_sativus_newGene_1842.4
chr1	StringTie	exon	6119071	6120001	-	Parent=Cucumis_sativus_newGene_1842.5
chr1	StringTie	exon	6119071	6119232	-	Parent=Cucumis_sativus_newGene_1842.6
chr1	StringTie	exon	6119321	6119531	-	Parent=Cucumis_sativus_newGene_1842.1
chr1	StringTie	exon	6119321	6119531	-	Parent=Cucumis_sativus_newGene_1842.2
chr1	StringTie	exon	6119321	6119531	-	Parent=Cucumis_sativus_newGene_1842.6
chr1	StringTie	exon	6119667	6119703	-	Parent=Cucumis_sativus_newGene_1842.1
chr1	StringTie	exon	6119667	6120001	-	Parent=Cucumis_sativus_newGene_1842.2
chr1	StringTie	exon	6119667	6119703	-	Parent=Cucumis_sativus_newGene_1842.4
chr1	StringTie	exon	6119848	6120001	-	Parent=Cucumis_sativus_newGene_1842.1
chr1	StringTie	exon	6119848	6120001	-	Parent=Cucumis_sativus_newGene_1842.3
chr1	StringTie	exon	6119848	6120001	-	Parent=Cucumis_sativus_newGene_1842.4
chr1	StringTie	exon	6119848	6120001	-	Parent=Cucumis_sativus_newGene_1842.6
chr1	StringTie	gene	6562902	6564343	+	ID=Cucumis_sativus_newGene_1859
chr1	StringTie	mRNA	6562902	6564343	+	ID=Cucumis_sativus_newGene_1859.1;Parent=Cucumis_sativus_newGene_1859
chr1	StringTie	exon	6562902	6563033	+	Parent=Cucumis_sativus_newGene_1859.1
chr1	StringTie	exon	6563665	6563823	+	Parent=Cucumis_sativus_newGene_1859.1
chr1	StringTie	exon	6563909	6564343	+	Parent=Cucumis_sativus_newGene_1859.1
chr1	StringTie	gene	6642755	6644172	-	ID=Cucumis_sativus_newGene_1864
chr1	StringTie	mRNA	6642755	6644172	-	ID=Cucumis_sativus_newGene_1864.1;Parent=Cucumis_sativus_newGene_1864
chr1	StringTie	exon	6642755	6643285	-	Parent=Cucumis_sativus_newGene_1864.1
chr1	StringTie	mRNA	6642755	6644172	-	ID=Cucumis_sativus_newGene_1864.2;Parent=Cucumis_sativus_newGene_1864
chr1	StringTie	exon	6642755	6643326	-	Parent=Cucumis_sativus_newGene_1864.2
chr1	StringTie	mRNA	6642817	6644172	-	ID=Cucumis_sativus_newGene_1864.3;Parent=Cucumis_sativus_newGene_1864
chr1	StringTie	exon	6642817	6643244	-	Parent=Cucumis_sativus_newGene_1864.3
chr1	StringTie	mRNA	6642825	6644172	-	ID=Cucumis_sativus_newGene_1864.4;Parent=Cucumis_sativus_newGene_1864
chr1	StringTie	exon	6642825	6643244	-	Parent=Cucumis_sativus_newGene_1864.4
chr1	StringTie	exon	6643327	6644172	-	Parent=Cucumis_sativus_newGene_1864.1
chr1	StringTie	exon	6643327	6644172	-	Parent=Cucumis_sativus_newGene_1864.3
chr1	StringTie	exon	6643368	6644172	-	Parent=Cucumis_sativus_newGene_1864.2
chr1	StringTie	exon	6643368	6644172	-	Parent=Cucumis_sativus_newGene_1864.4
chr1	StringTie	gene	6738823	6743643	-	ID=Cucumis_sativus_newGene_1876
chr1	StringTie	mRNA	6738823	6743643	-	ID=Cucumis_sativus_newGene_1876.2;Parent=Cucumis_sativus_newGene_1876
chr1	StringTie	exon	6738823	6739814	-	Parent=Cucumis_sativus_newGene_1876.2
chr1	StringTie	mRNA	6738823	6743643	-	ID=Cucumis_sativus_newGene_1876.3;Parent=Cucumis_sativus_newGene_1876
chr1	StringTie	exon	6738823	6739814	-	Parent=Cucumis_sativus_newGene_1876.3
chr1	StringTie	mRNA	6739135	6743643	-	ID=Cucumis_sativus_newGene_1876.4;Parent=Cucumis_sativus_newGene_1876
chr1	StringTie	exon	6739135	6739808	-	Parent=Cucumis_sativus_newGene_1876.4
chr1	StringTie	mRNA	6739154	6743643	-	ID=Cucumis_sativus_newGene_1876.1;Parent=Cucumis_sativus_newGene_1876
chr1	StringTie	exon	6739154	6739808	-	Parent=Cucumis_sativus_newGene_1876.1
chr1	StringTie	exon	6739902	6739998	-	Parent=Cucumis_sativus_newGene_1876.1
chr1	StringTie	exon	6739902	6739998	-	Parent=Cucumis_sativus_newGene_1876.2
chr1	StringTie	exon	6739902	6739998	-	Parent=Cucumis_sativus_newGene_1876.3
chr1	StringTie	exon	6739902	6739998	-	Parent=Cucumis_sativus_newGene_1876.4
chr1	StringTie	exon	6740105	6740235	-	Parent=Cucumis_sativus_newGene_1876.1
chr1	StringTie	exon	6740105	6740235	-	Parent=Cucumis_sativus_newGene_1876.2
chr1	StringTie	exon	6740105	6740235	-	Parent=Cucumis_sativus_newGene_1876.3
chr1	StringTie	exon	6740105	6740235	-	Parent=Cucumis_sativus_newGene_1876.4
chr1	StringTie	exon	6740313	6741978	-	Parent=Cucumis_sativus_newGene_1876.1
chr1	StringTie	exon	6740313	6740368	-	Parent=Cucumis_sativus_newGene_1876.2
chr1	StringTie	exon	6740313	6740368	-	Parent=Cucumis_sativus_newGene_1876.3
chr1	StringTie	exon	6740313	6740368	-	Parent=Cucumis_sativus_newGene_1876.4
chr1	StringTie	exon	6741897	6741978	-	Parent=Cucumis_sativus_newGene_1876.3
chr1	StringTie	exon	6741897	6741978	-	Parent=Cucumis_sativus_newGene_1876.4
chr1	StringTie	exon	6742355	6742823	-	Parent=Cucumis_sativus_newGene_1876.1
chr1	StringTie	exon	6742355	6742823	-	Parent=Cucumis_sativus_newGene_1876.2
chr1	StringTie	exon	6742355	6742823	-	Parent=Cucumis_sativus_newGene_1876.3
chr1	StringTie	exon	6742355	6742823	-	Parent=Cucumis_sativus_newGene_1876.4
chr1	StringTie	exon	6743049	6743643	-	Parent=Cucumis_sativus_newGene_1876.1
chr1	StringTie	exon	6743049	6743643	-	Parent=Cucumis_sativus_newGene_1876.2
chr1	StringTie	exon	6743049	6743643	-	Parent=Cucumis_sativus_newGene_1876.3
chr1	StringTie	exon	6743049	6743643	-	Parent=Cucumis_sativus_newGene_1876.4
chr1	StringTie	gene	6930771	6931550	+	ID=Cucumis_sativus_newGene_1894
chr1	StringTie	mRNA	6930771	6931550	+	ID=Cucumis_sativus_newGene_1894.1;Parent=Cucumis_sativus_newGene_1894
chr1	StringTie	exon	6930771	6930977	+	Parent=Cucumis_sativus_newGene_1894.1
chr1	StringTie	exon	6931066	6931550	+	Parent=Cucumis_sativus_newGene_1894.1
chr1	StringTie	gene	6931566	6931910	+	ID=Cucumis_sativus_newGene_1895
chr1	StringTie	mRNA	6931566	6931910	+	ID=Cucumis_sativus_newGene_1895.1;Parent=Cucumis_sativus_newGene_1895
chr1	StringTie	exon	6931566	6931593	+	Parent=Cucumis_sativus_newGene_1895.1
chr1	StringTie	exon	6931677	6931910	+	Parent=Cucumis_sativus_newGene_1895.1
chr1	StringTie	gene	8570553	8571896	+	ID=Cucumis_sativus_newGene_145
chr1	StringTie	mRNA	8570553	8571896	+	ID=Cucumis_sativus_newGene_145.1;Parent=Cucumis_sativus_newGene_145
chr1	StringTie	exon	8570553	8571247	+	Parent=Cucumis_sativus_newGene_145.1
chr1	StringTie	mRNA	8570570	8571896	+	ID=Cucumis_sativus_newGene_145.3;Parent=Cucumis_sativus_newGene_145
chr1	StringTie	exon	8570570	8571080	+	Parent=Cucumis_sativus_newGene_145.3
chr1	StringTie	mRNA	8570570	8571896	+	ID=Cucumis_sativus_newGene_145.4;Parent=Cucumis_sativus_newGene_145
chr1	StringTie	exon	8570570	8570963	+	Parent=Cucumis_sativus_newGene_145.4
chr1	StringTie	mRNA	8570574	8571896	+	ID=Cucumis_sativus_newGene_145.5;Parent=Cucumis_sativus_newGene_145
chr1	StringTie	exon	8570574	8570816	+	Parent=Cucumis_sativus_newGene_145.5
chr1	StringTie	mRNA	8570574	8571896	+	ID=Cucumis_sativus_newGene_145.6;Parent=Cucumis_sativus_newGene_145
chr1	StringTie	exon	8570574	8570963	+	Parent=Cucumis_sativus_newGene_145.6
chr1	StringTie	mRNA	8570574	8571439	+	ID=Cucumis_sativus_newGene_145.7;Parent=Cucumis_sativus_newGene_145
chr1	StringTie	exon	8570574	8570980	+	Parent=Cucumis_sativus_newGene_145.7
chr1	StringTie	mRNA	8570584	8571896	+	ID=Cucumis_sativus_newGene_145.8;Parent=Cucumis_sativus_newGene_145
chr1	StringTie	exon	8570584	8570816	+	Parent=Cucumis_sativus_newGene_145.8
chr1	StringTie	mRNA	8570587	8571896	+	ID=Cucumis_sativus_newGene_145.9;Parent=Cucumis_sativus_newGene_145
chr1	StringTie	exon	8570587	8570816	+	Parent=Cucumis_sativus_newGene_145.9
chr1	StringTie	mRNA	8570589	8571896	+	ID=Cucumis_sativus_newGene_145.10;Parent=Cucumis_sativus_newGene_145
chr1	StringTie	exon	8570589	8570816	+	Parent=Cucumis_sativus_newGene_145.10
chr1	StringTie	mRNA	8570589	8571896	+	ID=Cucumis_sativus_newGene_145.2;Parent=Cucumis_sativus_newGene_145
chr1	StringTie	exon	8570589	8570816	+	Parent=Cucumis_sativus_newGene_145.2
chr1	StringTie	exon	8570902	8570980	+	Parent=Cucumis_sativus_newGene_145.10
chr1	StringTie	exon	8570902	8570963	+	Parent=Cucumis_sativus_newGene_145.2
chr1	StringTie	exon	8570902	8571080	+	Parent=Cucumis_sativus_newGene_145.5
chr1	StringTie	exon	8570902	8570980	+	Parent=Cucumis_sativus_newGene_145.8
chr1	StringTie	exon	8570902	8571247	+	Parent=Cucumis_sativus_newGene_145.9
chr1	StringTie	exon	8571063	8571080	+	Parent=Cucumis_sativus_newGene_145.2
chr1	StringTie	exon	8571063	8571080	+	Parent=Cucumis_sativus_newGene_145.6
chr1	StringTie	exon	8571063	8571080	+	Parent=Cucumis_sativus_newGene_145.7
chr1	StringTie	exon	8571063	8571247	+	Parent=Cucumis_sativus_newGene_145.8
chr1	StringTie	exon	8571209	8571247	+	Parent=Cucumis_sativus_newGene_145.10
chr1	StringTie	exon	8571209	8571247	+	Parent=Cucumis_sativus_newGene_145.2
chr1	StringTie	exon	8571209	8571247	+	Parent=Cucumis_sativus_newGene_145.3
chr1	StringTie	exon	8571209	8571247	+	Parent=Cucumis_sativus_newGene_145.4
chr1	StringTie	exon	8571209	8571247	+	Parent=Cucumis_sativus_newGene_145.5
chr1	StringTie	exon	8571209	8571247	+	Parent=Cucumis_sativus_newGene_145.6
chr1	StringTie	exon	8571209	8571439	+	Parent=Cucumis_sativus_newGene_145.7
chr1	StringTie	exon	8571542	8571896	+	Parent=Cucumis_sativus_newGene_145.1
chr1	StringTie	exon	8571542	8571896	+	Parent=Cucumis_sativus_newGene_145.10
chr1	StringTie	exon	8571542	8571896	+	Parent=Cucumis_sativus_newGene_145.2
chr1	StringTie	exon	8571542	8571896	+	Parent=Cucumis_sativus_newGene_145.3
chr1	StringTie	exon	8571542	8571896	+	Parent=Cucumis_sativus_newGene_145.5
chr1	StringTie	exon	8571542	8571896	+	Parent=Cucumis_sativus_newGene_145.6
chr1	StringTie	exon	8571542	8571896	+	Parent=Cucumis_sativus_newGene_145.8
chr1	StringTie	exon	8571542	8571896	+	Parent=Cucumis_sativus_newGene_145.9
chr1	StringTie	exon	8571569	8571896	+	Parent=Cucumis_sativus_newGene_145.4
chr1	StringTie	gene	8990793	8991648	+	ID=Cucumis_sativus_newGene_170
chr1	StringTie	mRNA	8990793	8991648	+	ID=Cucumis_sativus_newGene_170.1;Parent=Cucumis_sativus_newGene_170
chr1	StringTie	exon	8990793	8990809	+	Parent=Cucumis_sativus_newGene_170.1
chr1	StringTie	exon	8991220	8991648	+	Parent=Cucumis_sativus_newGene_170.1
chr1	StringTie	gene	8992774	8993323	+	ID=Cucumis_sativus_newGene_176
chr1	StringTie	mRNA	8992774	8993323	+	ID=Cucumis_sativus_newGene_176.1;Parent=Cucumis_sativus_newGene_176
chr1	StringTie	exon	8992774	8992879	+	Parent=Cucumis_sativus_newGene_176.1
chr1	StringTie	exon	8992997	8993323	+	Parent=Cucumis_sativus_newGene_176.1
chr1	StringTie	gene	9015474	9016116	+	ID=Cucumis_sativus_newGene_182
chr1	StringTie	mRNA	9015474	9016116	+	ID=Cucumis_sativus_newGene_182.1;Parent=Cucumis_sativus_newGene_182
chr1	StringTie	exon	9015474	9015814	+	Parent=Cucumis_sativus_newGene_182.1
chr1	StringTie	exon	9016013	9016116	+	Parent=Cucumis_sativus_newGene_182.1
chr1	StringTie	gene	9090453	9091057	-	ID=Cucumis_sativus_newGene_195
chr1	StringTie	mRNA	9090453	9091057	-	ID=Cucumis_sativus_newGene_195.1;Parent=Cucumis_sativus_newGene_195
chr1	StringTie	exon	9090453	9090898	-	Parent=Cucumis_sativus_newGene_195.1
chr1	StringTie	exon	9091015	9091057	-	Parent=Cucumis_sativus_newGene_195.1
chr1	StringTie	gene	9151468	9159228	-	ID=Cucumis_sativus_newGene_207
chr1	StringTie	mRNA	9151468	9159228	-	ID=Cucumis_sativus_newGene_207.1;Parent=Cucumis_sativus_newGene_207
chr1	StringTie	exon	9151468	9151966	-	Parent=Cucumis_sativus_newGene_207.1
chr1	StringTie	exon	9157875	9159228	-	Parent=Cucumis_sativus_newGene_207.1
chr1	StringTie	gene	9222718	9223630	+	ID=Cucumis_sativus_newGene_211
chr1	StringTie	mRNA	9222718	9223630	+	ID=Cucumis_sativus_newGene_211.1;Parent=Cucumis_sativus_newGene_211
chr1	StringTie	exon	9222718	9222798	+	Parent=Cucumis_sativus_newGene_211.1
chr1	StringTie	exon	9223478	9223630	+	Parent=Cucumis_sativus_newGene_211.1
chr1	StringTie	gene	9369434	9375349	-	ID=Cucumis_sativus_newGene_222
chr1	StringTie	mRNA	9369434	9375349	-	ID=Cucumis_sativus_newGene_222.1;Parent=Cucumis_sativus_newGene_222
chr1	StringTie	exon	9369434	9369995	-	Parent=Cucumis_sativus_newGene_222.1
chr1	StringTie	exon	9374359	9374450	-	Parent=Cucumis_sativus_newGene_222.1
chr1	StringTie	exon	9375056	9375349	-	Parent=Cucumis_sativus_newGene_222.1
chr1	StringTie	gene	9394019	9398630	-	ID=Cucumis_sativus_newGene_224
chr1	StringTie	mRNA	9396747	9398630	-	ID=Cucumis_sativus_newGene_224.3;Parent=Cucumis_sativus_newGene_224
chr1	StringTie	exon	9396747	9397935	-	Parent=Cucumis_sativus_newGene_224.3
chr1	StringTie	exon	9398247	9398630	-	Parent=Cucumis_sativus_newGene_224.3
chr1	StringTie	gene	9399423	9400331	-	ID=Cucumis_sativus_newGene_226
chr1	StringTie	mRNA	9399423	9400331	-	ID=Cucumis_sativus_newGene_226.1;Parent=Cucumis_sativus_newGene_226
chr1	StringTie	exon	9399423	9399639	-	Parent=Cucumis_sativus_newGene_226.1
chr1	StringTie	exon	9400239	9400331	-	Parent=Cucumis_sativus_newGene_226.1
chr1	StringTie	gene	9425143	9427817	-	ID=Cucumis_sativus_newGene_227
chr1	StringTie	mRNA	9425143	9427817	-	ID=Cucumis_sativus_newGene_227.1;Parent=Cucumis_sativus_newGene_227
chr1	StringTie	exon	9425143	9426056	-	Parent=Cucumis_sativus_newGene_227.1
chr1	StringTie	mRNA	9425522	9427029	-	ID=Cucumis_sativus_newGene_227.2;Parent=Cucumis_sativus_newGene_227
chr1	StringTie	exon	9425522	9426056	-	Parent=Cucumis_sativus_newGene_227.2
chr1	StringTie	exon	9426901	9427029	-	Parent=Cucumis_sativus_newGene_227.2
chr1	StringTie	exon	9427735	9427817	-	Parent=Cucumis_sativus_newGene_227.1
chr1	StringTie	gene	9565199	9568525	-	ID=Cucumis_sativus_newGene_235
chr1	StringTie	mRNA	9565199	9568525	-	ID=Cucumis_sativus_newGene_235.1;Parent=Cucumis_sativus_newGene_235
chr1	StringTie	exon	9565199	9565769	-	Parent=Cucumis_sativus_newGene_235.1
chr1	StringTie	mRNA	9565293	9568525	-	ID=Cucumis_sativus_newGene_235.2;Parent=Cucumis_sativus_newGene_235
chr1	StringTie	exon	9565293	9565769	-	Parent=Cucumis_sativus_newGene_235.2
chr1	StringTie	mRNA	9565406	9568525	-	ID=Cucumis_sativus_newGene_235.3;Parent=Cucumis_sativus_newGene_235
chr1	StringTie	exon	9565406	9565769	-	Parent=Cucumis_sativus_newGene_235.3
chr1	StringTie	exon	9565854	9566135	-	Parent=Cucumis_sativus_newGene_235.1
chr1	StringTie	exon	9565854	9568525	-	Parent=Cucumis_sativus_newGene_235.2
chr1	StringTie	exon	9565854	9566132	-	Parent=Cucumis_sativus_newGene_235.3
chr1	StringTie	exon	9566214	9568525	-	Parent=Cucumis_sativus_newGene_235.1
chr1	StringTie	exon	9566214	9568525	-	Parent=Cucumis_sativus_newGene_235.3
chr1	StringTie	gene	9716758	9720590	-	ID=Cucumis_sativus_newGene_248
chr1	StringTie	mRNA	9716758	9720590	-	ID=Cucumis_sativus_newGene_248.1;Parent=Cucumis_sativus_newGene_248
chr1	StringTie	exon	9716758	9716904	-	Parent=Cucumis_sativus_newGene_248.1
chr1	StringTie	mRNA	9716862	9720590	-	ID=Cucumis_sativus_newGene_248.2;Parent=Cucumis_sativus_newGene_248
chr1	StringTie	exon	9716862	9717229	-	Parent=Cucumis_sativus_newGene_248.2
chr1	StringTie	exon	9717013	9717229	-	Parent=Cucumis_sativus_newGene_248.1
chr1	StringTie	mRNA	9717369	9720590	-	ID=Cucumis_sativus_newGene_248.3;Parent=Cucumis_sativus_newGene_248
chr1	StringTie	exon	9717369	9717806	-	Parent=Cucumis_sativus_newGene_248.3
chr1	StringTie	mRNA	9718284	9720590	-	ID=Cucumis_sativus_newGene_248.4;Parent=Cucumis_sativus_newGene_248
chr1	StringTie	exon	9718284	9718956	-	Parent=Cucumis_sativus_newGene_248.4
chr1	StringTie	exon	9719997	9720074	-	Parent=Cucumis_sativus_newGene_248.1
chr1	StringTie	exon	9719997	9720074	-	Parent=Cucumis_sativus_newGene_248.2
chr1	StringTie	exon	9719997	9720074	-	Parent=Cucumis_sativus_newGene_248.3
chr1	StringTie	exon	9719997	9720074	-	Parent=Cucumis_sativus_newGene_248.4
chr1	StringTie	exon	9720218	9720590	-	Parent=Cucumis_sativus_newGene_248.1
chr1	StringTie	exon	9720218	9720590	-	Parent=Cucumis_sativus_newGene_248.2
chr1	StringTie	exon	9720218	9720590	-	Parent=Cucumis_sativus_newGene_248.3
chr1	StringTie	exon	9720218	9720590	-	Parent=Cucumis_sativus_newGene_248.4
chr1	StringTie	gene	10229835	10231682	+	ID=Cucumis_sativus_newGene_275
chr1	StringTie	mRNA	10229835	10231682	+	ID=Cucumis_sativus_newGene_275.1;Parent=Cucumis_sativus_newGene_275
chr1	StringTie	exon	10229835	10229898	+	Parent=Cucumis_sativus_newGene_275.1
chr1	StringTie	mRNA	10230019	10231682	+	ID=Cucumis_sativus_newGene_275.3;Parent=Cucumis_sativus_newGene_275
chr1	StringTie	exon	10230019	10230321	+	Parent=Cucumis_sativus_newGene_275.3
chr1	StringTie	exon	10230148	10230321	+	Parent=Cucumis_sativus_newGene_275.1
chr1	StringTie	exon	10230795	10230871	+	Parent=Cucumis_sativus_newGene_275.1
chr1	StringTie	exon	10230795	10230871	+	Parent=Cucumis_sativus_newGene_275.3
chr1	StringTie	exon	10231002	10231094	+	Parent=Cucumis_sativus_newGene_275.1
chr1	StringTie	exon	10231002	10231682	+	Parent=Cucumis_sativus_newGene_275.3
chr1	StringTie	exon	10231373	10231682	+	Parent=Cucumis_sativus_newGene_275.1
chr1	StringTie	gene	10505867	10507910	+	ID=Cucumis_sativus_newGene_281
chr1	StringTie	mRNA	10505867	10507910	+	ID=Cucumis_sativus_newGene_281.1;Parent=Cucumis_sativus_newGene_281
chr1	StringTie	exon	10505867	10506362	+	Parent=Cucumis_sativus_newGene_281.1
chr1	StringTie	exon	10507314	10507910	+	Parent=Cucumis_sativus_newGene_281.1
chr1	StringTie	gene	10698640	10701680	+	ID=Cucumis_sativus_newGene_287
chr1	StringTie	mRNA	10698640	10701680	+	ID=Cucumis_sativus_newGene_287.1;Parent=Cucumis_sativus_newGene_287
chr1	StringTie	exon	10698640	10698910	+	Parent=Cucumis_sativus_newGene_287.1
chr1	StringTie	mRNA	10698641	10701680	+	ID=Cucumis_sativus_newGene_287.2;Parent=Cucumis_sativus_newGene_287
chr1	StringTie	exon	10698641	10698910	+	Parent=Cucumis_sativus_newGene_287.2
chr1	StringTie	mRNA	10698743	10701402	+	ID=Cucumis_sativus_newGene_287.3;Parent=Cucumis_sativus_newGene_287
chr1	StringTie	exon	10698743	10698910	+	Parent=Cucumis_sativus_newGene_287.3
chr1	StringTie	exon	10699011	10699066	+	Parent=Cucumis_sativus_newGene_287.1
chr1	StringTie	exon	10699011	10699066	+	Parent=Cucumis_sativus_newGene_287.2
chr1	StringTie	exon	10699011	10699066	+	Parent=Cucumis_sativus_newGene_287.3
chr1	StringTie	exon	10700156	10700762	+	Parent=Cucumis_sativus_newGene_287.1
chr1	StringTie	exon	10700156	10700762	+	Parent=Cucumis_sativus_newGene_287.2
chr1	StringTie	exon	10700156	10700762	+	Parent=Cucumis_sativus_newGene_287.3
chr1	StringTie	exon	10700844	10700931	+	Parent=Cucumis_sativus_newGene_287.1
chr1	StringTie	exon	10700844	10700931	+	Parent=Cucumis_sativus_newGene_287.2
chr1	StringTie	exon	10700844	10701402	+	Parent=Cucumis_sativus_newGene_287.3
chr1	StringTie	exon	10701004	10701402	+	Parent=Cucumis_sativus_newGene_287.1
chr1	StringTie	exon	10701004	10701680	+	Parent=Cucumis_sativus_newGene_287.2
chr1	StringTie	exon	10701479	10701680	+	Parent=Cucumis_sativus_newGene_287.1
chr1	StringTie	gene	10776103	10777097	-	ID=Cucumis_sativus_newGene_293
chr1	StringTie	mRNA	10776103	10777097	-	ID=Cucumis_sativus_newGene_293.1;Parent=Cucumis_sativus_newGene_293
chr1	StringTie	exon	10776103	10776229	-	Parent=Cucumis_sativus_newGene_293.1
chr1	StringTie	exon	10776602	10777097	-	Parent=Cucumis_sativus_newGene_293.1
chr1	StringTie	gene	11238253	11238788	+	ID=Cucumis_sativus_newGene_371
chr1	StringTie	mRNA	11238253	11238788	+	ID=Cucumis_sativus_newGene_371.1;Parent=Cucumis_sativus_newGene_371
chr1	StringTie	exon	11238253	11238627	+	Parent=Cucumis_sativus_newGene_371.1
chr1	StringTie	exon	11238704	11238788	+	Parent=Cucumis_sativus_newGene_371.1
chr1	StringTie	gene	11336596	11338269	-	ID=Cucumis_sativus_newGene_395
chr1	StringTie	mRNA	11336596	11338269	-	ID=Cucumis_sativus_newGene_395.1;Parent=Cucumis_sativus_newGene_395
chr1	StringTie	exon	11336596	11337002	-	Parent=Cucumis_sativus_newGene_395.1
chr1	StringTie	exon	11337937	11338269	-	Parent=Cucumis_sativus_newGene_395.1
chr1	StringTie	gene	11506256	11507862	-	ID=Cucumis_sativus_newGene_438
chr1	StringTie	mRNA	11506256	11507862	-	ID=Cucumis_sativus_newGene_438.1;Parent=Cucumis_sativus_newGene_438
chr1	StringTie	exon	11506256	11506655	-	Parent=Cucumis_sativus_newGene_438.1
chr1	StringTie	exon	11507104	11507265	-	Parent=Cucumis_sativus_newGene_438.1
chr1	StringTie	exon	11507584	11507862	-	Parent=Cucumis_sativus_newGene_438.1
chr1	StringTie	gene	11865613	11871446	-	ID=Cucumis_sativus_newGene_490
chr1	StringTie	mRNA	11865613	11871446	-	ID=Cucumis_sativus_newGene_490.1;Parent=Cucumis_sativus_newGene_490
chr1	StringTie	exon	11865613	11866212	-	Parent=Cucumis_sativus_newGene_490.1
chr1	StringTie	mRNA	11865694	11871446	-	ID=Cucumis_sativus_newGene_490.5;Parent=Cucumis_sativus_newGene_490
chr1	StringTie	exon	11865694	11866212	-	Parent=Cucumis_sativus_newGene_490.5
chr1	StringTie	mRNA	11865933	11871446	-	ID=Cucumis_sativus_newGene_490.6;Parent=Cucumis_sativus_newGene_490
chr1	StringTie	exon	11865933	11866212	-	Parent=Cucumis_sativus_newGene_490.6
chr1	StringTie	mRNA	11865933	11871446	-	ID=Cucumis_sativus_newGene_490.7;Parent=Cucumis_sativus_newGene_490
chr1	StringTie	exon	11865933	11866212	-	Parent=Cucumis_sativus_newGene_490.7
chr1	StringTie	mRNA	11865933	11871446	-	ID=Cucumis_sativus_newGene_490.8;Parent=Cucumis_sativus_newGene_490
chr1	StringTie	exon	11865933	11866212	-	Parent=Cucumis_sativus_newGene_490.8
chr1	StringTie	mRNA	11865949	11871446	-	ID=Cucumis_sativus_newGene_490.9;Parent=Cucumis_sativus_newGene_490
chr1	StringTie	exon	11865949	11866212	-	Parent=Cucumis_sativus_newGene_490.9
chr1	StringTie	mRNA	11865994	11871446	-	ID=Cucumis_sativus_newGene_490.10;Parent=Cucumis_sativus_newGene_490
chr1	StringTie	exon	11865994	11866245	-	Parent=Cucumis_sativus_newGene_490.10
chr1	StringTie	mRNA	11865994	11871446	-	ID=Cucumis_sativus_newGene_490.11;Parent=Cucumis_sativus_newGene_490
chr1	StringTie	exon	11865994	11866212	-	Parent=Cucumis_sativus_newGene_490.11
chr1	StringTie	mRNA	11865997	11871446	-	ID=Cucumis_sativus_newGene_490.12;Parent=Cucumis_sativus_newGene_490
chr1	StringTie	exon	11865997	11866212	-	Parent=Cucumis_sativus_newGene_490.12
chr1	StringTie	mRNA	11865997	11871446	-	ID=Cucumis_sativus_newGene_490.2;Parent=Cucumis_sativus_newGene_490
chr1	StringTie	exon	11865997	11866212	-	Parent=Cucumis_sativus_newGene_490.2
chr1	StringTie	mRNA	11865997	11871446	-	ID=Cucumis_sativus_newGene_490.3;Parent=Cucumis_sativus_newGene_490
chr1	StringTie	exon	11865997	11866212	-	Parent=Cucumis_sativus_newGene_490.3
chr1	StringTie	exon	11866791	11866859	-	Parent=Cucumis_sativus_newGene_490.10
chr1	StringTie	exon	11866791	11866859	-	Parent=Cucumis_sativus_newGene_490.2
chr1	StringTie	exon	11866791	11866859	-	Parent=Cucumis_sativus_newGene_490.3
chr1	StringTie	exon	11866791	11866859	-	Parent=Cucumis_sativus_newGene_490.7
chr1	StringTie	exon	11866804	11866859	-	Parent=Cucumis_sativus_newGene_490.9
chr1	StringTie	exon	11868307	11868445	-	Parent=Cucumis_sativus_newGene_490.1
chr1	StringTie	exon	11868307	11871446	-	Parent=Cucumis_sativus_newGene_490.10
chr1	StringTie	exon	11868307	11868445	-	Parent=Cucumis_sativus_newGene_490.11
chr1	StringTie	exon	11868307	11868445	-	Parent=Cucumis_sativus_newGene_490.12
chr1	StringTie	exon	11868307	11868421	-	Parent=Cucumis_sativus_newGene_490.2
chr1	StringTie	exon	11868307	11868445	-	Parent=Cucumis_sativus_newGene_490.3
chr1	StringTie	exon	11868307	11868445	-	Parent=Cucumis_sativus_newGene_490.5
chr1	StringTie	exon	11868307	11870968	-	Parent=Cucumis_sativus_newGene_490.6
chr1	StringTie	exon	11868307	11871446	-	Parent=Cucumis_sativus_newGene_490.7
chr1	StringTie	exon	11868307	11868445	-	Parent=Cucumis_sativus_newGene_490.8
chr1	StringTie	exon	11868307	11871446	-	Parent=Cucumis_sativus_newGene_490.9
chr1	StringTie	exon	11869549	11871446	-	Parent=Cucumis_sativus_newGene_490.11
chr1	StringTie	exon	11870268	11871446	-	Parent=Cucumis_sativus_newGene_490.1
chr1	StringTie	exon	11870268	11870968	-	Parent=Cucumis_sativus_newGene_490.12
chr1	StringTie	exon	11870893	11870968	-	Parent=Cucumis_sativus_newGene_490.2
chr1	StringTie	exon	11870893	11870968	-	Parent=Cucumis_sativus_newGene_490.3
chr1	StringTie	exon	11870893	11870968	-	Parent=Cucumis_sativus_newGene_490.5
chr1	StringTie	exon	11871069	11871446	-	Parent=Cucumis_sativus_newGene_490.12
chr1	StringTie	exon	11871069	11871446	-	Parent=Cucumis_sativus_newGene_490.2
chr1	StringTie	exon	11871069	11871446	-	Parent=Cucumis_sativus_newGene_490.3
chr1	StringTie	exon	11871069	11871446	-	Parent=Cucumis_sativus_newGene_490.5
chr1	StringTie	exon	11871069	11871446	-	Parent=Cucumis_sativus_newGene_490.6
chr1	StringTie	exon	11871069	11871446	-	Parent=Cucumis_sativus_newGene_490.8
chr1	StringTie	gene	12130956	12131919	+	ID=Cucumis_sativus_newGene_506
chr1	StringTie	mRNA	12130956	12131919	+	ID=Cucumis_sativus_newGene_506.1;Parent=Cucumis_sativus_newGene_506
chr1	StringTie	exon	12130956	12131276	+	Parent=Cucumis_sativus_newGene_506.1
chr1	StringTie	exon	12131417	12131919	+	Parent=Cucumis_sativus_newGene_506.1
chr1	StringTie	gene	12236909	12237370	+	ID=Cucumis_sativus_newGene_512
chr1	StringTie	mRNA	12236909	12237370	+	ID=Cucumis_sativus_newGene_512.1;Parent=Cucumis_sativus_newGene_512
chr1	StringTie	exon	12236909	12236935	+	Parent=Cucumis_sativus_newGene_512.1
chr1	StringTie	exon	12237016	12237103	+	Parent=Cucumis_sativus_newGene_512.1
chr1	StringTie	exon	12237176	12237370	+	Parent=Cucumis_sativus_newGene_512.1
chr1	StringTie	gene	12309040	12316335	-	ID=Cucumis_sativus_newGene_515
chr1	StringTie	mRNA	12309040	12316335	-	ID=Cucumis_sativus_newGene_515.1;Parent=Cucumis_sativus_newGene_515
chr1	StringTie	exon	12309040	12309136	-	Parent=Cucumis_sativus_newGene_515.1
chr1	StringTie	mRNA	12312121	12316335	-	ID=Cucumis_sativus_newGene_515.2;Parent=Cucumis_sativus_newGene_515
chr1	StringTie	exon	12312121	12312212	-	Parent=Cucumis_sativus_newGene_515.2
chr1	StringTie	exon	12312282	12316335	-	Parent=Cucumis_sativus_newGene_515.2
chr1	StringTie	exon	12315000	12316335	-	Parent=Cucumis_sativus_newGene_515.1
chr1	StringTie	gene	12689494	12690249	-	ID=Cucumis_sativus_newGene_522
chr1	StringTie	mRNA	12689494	12690249	-	ID=Cucumis_sativus_newGene_522.1;Parent=Cucumis_sativus_newGene_522
chr1	StringTie	exon	12689494	12689788	-	Parent=Cucumis_sativus_newGene_522.1
chr1	StringTie	exon	12690205	12690249	-	Parent=Cucumis_sativus_newGene_522.1
chr1	StringTie	gene	12836075	12840783	+	ID=Cucumis_sativus_newGene_524
chr1	StringTie	mRNA	12836075	12840783	+	ID=Cucumis_sativus_newGene_524.2;Parent=Cucumis_sativus_newGene_524
chr1	StringTie	exon	12836075	12836454	+	Parent=Cucumis_sativus_newGene_524.2
chr1	StringTie	gene	12836075	12840783	-	ID=Cucumis_sativus_newGene_525
chr1	StringTie	mRNA	12836081	12840783	+	ID=Cucumis_sativus_newGene_524.3;Parent=Cucumis_sativus_newGene_524
chr1	StringTie	exon	12836081	12836398	+	Parent=Cucumis_sativus_newGene_524.3
chr1	StringTie	mRNA	12836097	12840783	+	ID=Cucumis_sativus_newGene_524.4;Parent=Cucumis_sativus_newGene_524
chr1	StringTie	exon	12836097	12836446	+	Parent=Cucumis_sativus_newGene_524.4
chr1	StringTie	exon	12836588	12840783	+	Parent=Cucumis_sativus_newGene_524.2
chr1	StringTie	exon	12836588	12840783	+	Parent=Cucumis_sativus_newGene_524.3
chr1	StringTie	exon	12836588	12840783	+	Parent=Cucumis_sativus_newGene_524.4
chr1	StringTie	mRNA	12838730	12840783	-	ID=Cucumis_sativus_newGene_525.2;Parent=Cucumis_sativus_newGene_525
chr1	StringTie	exon	12838730	12839723	-	Parent=Cucumis_sativus_newGene_525.2
chr1	StringTie	exon	12840163	12840783	-	Parent=Cucumis_sativus_newGene_525.2
chr1	StringTie	gene	12853710	12904825	+	ID=Cucumis_sativus_newGene_527
chr1	StringTie	mRNA	12853710	12904825	+	ID=Cucumis_sativus_newGene_527.1;Parent=Cucumis_sativus_newGene_527
chr1	StringTie	exon	12853710	12853887	+	Parent=Cucumis_sativus_newGene_527.1
chr1	StringTie	exon	12904719	12904825	+	Parent=Cucumis_sativus_newGene_527.1
chr1	StringTie	gene	13197438	13198966	+	ID=Cucumis_sativus_newGene_535
chr1	StringTie	mRNA	13197438	13198966	+	ID=Cucumis_sativus_newGene_535.1;Parent=Cucumis_sativus_newGene_535
chr1	StringTie	exon	13197438	13198159	+	Parent=Cucumis_sativus_newGene_535.1
chr1	StringTie	exon	13198545	13198966	+	Parent=Cucumis_sativus_newGene_535.1
chr1	StringTie	gene	13430392	13433386	+	ID=Cucumis_sativus_newGene_550
chr1	StringTie	mRNA	13430392	13433386	+	ID=Cucumis_sativus_newGene_550.1;Parent=Cucumis_sativus_newGene_550
chr1	StringTie	exon	13430392	13430955	+	Parent=Cucumis_sativus_newGene_550.1
chr1	StringTie	exon	13431043	13431077	+	Parent=Cucumis_sativus_newGene_550.1
chr1	StringTie	exon	13432966	13433386	+	Parent=Cucumis_sativus_newGene_550.1
chr1	StringTie	gene	13586161	13586694	+	ID=Cucumis_sativus_newGene_553
chr1	StringTie	mRNA	13586161	13586694	+	ID=Cucumis_sativus_newGene_553.1;Parent=Cucumis_sativus_newGene_553
chr1	StringTie	exon	13586161	13586521	+	Parent=Cucumis_sativus_newGene_553.1
chr1	StringTie	exon	13586599	13586694	+	Parent=Cucumis_sativus_newGene_553.1
chr1	StringTie	gene	13764780	13765362	-	ID=Cucumis_sativus_newGene_564
chr1	StringTie	mRNA	13764780	13765362	-	ID=Cucumis_sativus_newGene_564.1;Parent=Cucumis_sativus_newGene_564
chr1	StringTie	exon	13764780	13765081	-	Parent=Cucumis_sativus_newGene_564.1
chr1	StringTie	exon	13765215	13765362	-	Parent=Cucumis_sativus_newGene_564.1
chr1	StringTie	gene	13973805	13976677	-	ID=Cucumis_sativus_newGene_568
chr1	StringTie	mRNA	13973805	13976677	-	ID=Cucumis_sativus_newGene_568.1;Parent=Cucumis_sativus_newGene_568
chr1	StringTie	exon	13973805	13974661	-	Parent=Cucumis_sativus_newGene_568.1
chr1	StringTie	exon	13976025	13976063	-	Parent=Cucumis_sativus_newGene_568.1
chr1	StringTie	exon	13976164	13976677	-	Parent=Cucumis_sativus_newGene_568.1
chr1	StringTie	gene	14294749	14304678	+	ID=Cucumis_sativus_newGene_585
chr1	StringTie	mRNA	14294749	14304678	+	ID=Cucumis_sativus_newGene_585.1;Parent=Cucumis_sativus_newGene_585
chr1	StringTie	exon	14294749	14295321	+	Parent=Cucumis_sativus_newGene_585.1
chr1	StringTie	exon	14304496	14304678	+	Parent=Cucumis_sativus_newGene_585.1
chr1	StringTie	gene	14401862	14406585	-	ID=Cucumis_sativus_newGene_592
chr1	StringTie	mRNA	14401862	14406585	-	ID=Cucumis_sativus_newGene_592.4;Parent=Cucumis_sativus_newGene_592
chr1	StringTie	exon	14401862	14402011	-	Parent=Cucumis_sativus_newGene_592.4
chr1	StringTie	mRNA	14401867	14406585	-	ID=Cucumis_sativus_newGene_592.5;Parent=Cucumis_sativus_newGene_592
chr1	StringTie	exon	14401867	14402011	-	Parent=Cucumis_sativus_newGene_592.5
chr1	StringTie	mRNA	14401869	14406585	-	ID=Cucumis_sativus_newGene_592.6;Parent=Cucumis_sativus_newGene_592
chr1	StringTie	exon	14401869	14402011	-	Parent=Cucumis_sativus_newGene_592.6
chr1	StringTie	mRNA	14402689	14406585	-	ID=Cucumis_sativus_newGene_592.8;Parent=Cucumis_sativus_newGene_592
chr1	StringTie	exon	14402689	14402790	-	Parent=Cucumis_sativus_newGene_592.8
chr1	StringTie	mRNA	14403884	14406585	-	ID=Cucumis_sativus_newGene_592.1;Parent=Cucumis_sativus_newGene_592
chr1	StringTie	exon	14403884	14403980	-	Parent=Cucumis_sativus_newGene_592.1
chr1	StringTie	mRNA	14403884	14406585	-	ID=Cucumis_sativus_newGene_592.2;Parent=Cucumis_sativus_newGene_592
chr1	StringTie	exon	14403884	14403980	-	Parent=Cucumis_sativus_newGene_592.2
chr1	StringTie	mRNA	14403884	14406585	-	ID=Cucumis_sativus_newGene_592.3;Parent=Cucumis_sativus_newGene_592
chr1	StringTie	exon	14403884	14403980	-	Parent=Cucumis_sativus_newGene_592.3
chr1	StringTie	mRNA	14403884	14406585	-	ID=Cucumis_sativus_newGene_592.9;Parent=Cucumis_sativus_newGene_592
chr1	StringTie	exon	14403884	14403980	-	Parent=Cucumis_sativus_newGene_592.9
chr1	StringTie	exon	14404472	14404532	-	Parent=Cucumis_sativus_newGene_592.1
chr1	StringTie	exon	14404472	14404532	-	Parent=Cucumis_sativus_newGene_592.2
chr1	StringTie	exon	14404472	14404532	-	Parent=Cucumis_sativus_newGene_592.3
chr1	StringTie	exon	14404472	14404532	-	Parent=Cucumis_sativus_newGene_592.9
chr1	StringTie	exon	14404673	14404805	-	Parent=Cucumis_sativus_newGene_592.1
chr1	StringTie	exon	14404673	14404805	-	Parent=Cucumis_sativus_newGene_592.3
chr1	StringTie	exon	14404673	14404805	-	Parent=Cucumis_sativus_newGene_592.9
chr1	StringTie	exon	14405302	14405468	-	Parent=Cucumis_sativus_newGene_592.1
chr1	StringTie	exon	14405302	14405468	-	Parent=Cucumis_sativus_newGene_592.2
chr1	StringTie	exon	14405302	14405456	-	Parent=Cucumis_sativus_newGene_592.3
chr1	StringTie	exon	14405302	14405468	-	Parent=Cucumis_sativus_newGene_592.4
chr1	StringTie	exon	14405302	14405468	-	Parent=Cucumis_sativus_newGene_592.5
chr1	StringTie	exon	14405302	14405468	-	Parent=Cucumis_sativus_newGene_592.6
chr1	StringTie	exon	14405302	14405468	-	Parent=Cucumis_sativus_newGene_592.9
chr1	StringTie	exon	14405833	14405938	-	Parent=Cucumis_sativus_newGene_592.1
chr1	StringTie	exon	14405833	14406585	-	Parent=Cucumis_sativus_newGene_592.2
chr1	StringTie	exon	14405833	14406585	-	Parent=Cucumis_sativus_newGene_592.3
chr1	StringTie	exon	14405833	14405938	-	Parent=Cucumis_sativus_newGene_592.4
chr1	StringTie	exon	14405833	14406585	-	Parent=Cucumis_sativus_newGene_592.5
chr1	StringTie	exon	14405833	14405933	-	Parent=Cucumis_sativus_newGene_592.6
chr1	StringTie	exon	14405833	14406585	-	Parent=Cucumis_sativus_newGene_592.9
chr1	StringTie	exon	14406177	14406585	-	Parent=Cucumis_sativus_newGene_592.6
chr1	StringTie	exon	14406359	14406585	-	Parent=Cucumis_sativus_newGene_592.1
chr1	StringTie	exon	14406359	14406585	-	Parent=Cucumis_sativus_newGene_592.4
chr1	StringTie	exon	14406359	14406585	-	Parent=Cucumis_sativus_newGene_592.8
chr1	StringTie	gene	14407946	14414718	-	ID=Cucumis_sativus_newGene_593
chr1	StringTie	mRNA	14412604	14414718	-	ID=Cucumis_sativus_newGene_593.2;Parent=Cucumis_sativus_newGene_593
chr1	StringTie	exon	14412604	14412976	-	Parent=Cucumis_sativus_newGene_593.2
chr1	StringTie	mRNA	14412606	14414718	-	ID=Cucumis_sativus_newGene_593.3;Parent=Cucumis_sativus_newGene_593
chr1	StringTie	exon	14412606	14412976	-	Parent=Cucumis_sativus_newGene_593.3
chr1	StringTie	mRNA	14412635	14414718	-	ID=Cucumis_sativus_newGene_593.4;Parent=Cucumis_sativus_newGene_593
chr1	StringTie	exon	14412635	14412976	-	Parent=Cucumis_sativus_newGene_593.4
chr1	StringTie	mRNA	14412737	14414718	-	ID=Cucumis_sativus_newGene_593.5;Parent=Cucumis_sativus_newGene_593
chr1	StringTie	exon	14412737	14412976	-	Parent=Cucumis_sativus_newGene_593.5
chr1	StringTie	exon	14413867	14413987	-	Parent=Cucumis_sativus_newGene_593.2
chr1	StringTie	exon	14413867	14414718	-	Parent=Cucumis_sativus_newGene_593.3
chr1	StringTie	exon	14413867	14413987	-	Parent=Cucumis_sativus_newGene_593.4
chr1	StringTie	exon	14413867	14413987	-	Parent=Cucumis_sativus_newGene_593.5
chr1	StringTie	exon	14414119	14414718	-	Parent=Cucumis_sativus_newGene_593.4
chr1	StringTie	exon	14414127	14414718	-	Parent=Cucumis_sativus_newGene_593.2
chr1	StringTie	exon	14414175	14414718	-	Parent=Cucumis_sativus_newGene_593.5
chr1	StringTie	gene	14487345	14494022	-	ID=Cucumis_sativus_newGene_599
chr1	StringTie	mRNA	14487345	14494022	-	ID=Cucumis_sativus_newGene_599.1;Parent=Cucumis_sativus_newGene_599
chr1	StringTie	exon	14487345	14488108	-	Parent=Cucumis_sativus_newGene_599.1
chr1	StringTie	mRNA	14489956	14494022	-	ID=Cucumis_sativus_newGene_599.2;Parent=Cucumis_sativus_newGene_599
chr1	StringTie	exon	14489956	14493579	-	Parent=Cucumis_sativus_newGene_599.2
chr1	StringTie	mRNA	14492292	14494022	-	ID=Cucumis_sativus_newGene_599.3;Parent=Cucumis_sativus_newGene_599
chr1	StringTie	exon	14492292	14493311	-	Parent=Cucumis_sativus_newGene_599.3
chr1	StringTie	exon	14493692	14494022	-	Parent=Cucumis_sativus_newGene_599.1
chr1	StringTie	exon	14493692	14494022	-	Parent=Cucumis_sativus_newGene_599.2
chr1	StringTie	exon	14493692	14494022	-	Parent=Cucumis_sativus_newGene_599.3
chr1	StringTie	gene	14499573	14500544	+	ID=Cucumis_sativus_newGene_600
chr1	StringTie	mRNA	14499573	14500544	+	ID=Cucumis_sativus_newGene_600.1;Parent=Cucumis_sativus_newGene_600
chr1	StringTie	exon	14499573	14500175	+	Parent=Cucumis_sativus_newGene_600.1
chr1	StringTie	exon	14500250	14500544	+	Parent=Cucumis_sativus_newGene_600.1
chr1	StringTie	gene	15050751	15067522	+	ID=Cucumis_sativus_newGene_621
chr1	StringTie	mRNA	15050751	15067522	+	ID=Cucumis_sativus_newGene_621.1;Parent=Cucumis_sativus_newGene_621
chr1	StringTie	exon	15050751	15050917	+	Parent=Cucumis_sativus_newGene_621.1
chr1	StringTie	gene	15053520	15059689	-	ID=Cucumis_sativus_newGene_623
chr1	StringTie	mRNA	15053520	15059689	-	ID=Cucumis_sativus_newGene_623.1;Parent=Cucumis_sativus_newGene_623
chr1	StringTie	exon	15053520	15053758	-	Parent=Cucumis_sativus_newGene_623.1
chr1	StringTie	exon	15059566	15059689	-	Parent=Cucumis_sativus_newGene_623.1
chr1	StringTie	exon	15067314	15067522	+	Parent=Cucumis_sativus_newGene_621.1
chr1	StringTie	gene	15078691	15108499	-	ID=Cucumis_sativus_newGene_630
chr1	StringTie	mRNA	15078691	15108499	-	ID=Cucumis_sativus_newGene_630.1;Parent=Cucumis_sativus_newGene_630
chr1	StringTie	exon	15078691	15078812	-	Parent=Cucumis_sativus_newGene_630.1
chr1	StringTie	gene	15079590	15109700	+	ID=Cucumis_sativus_newGene_631
chr1	StringTie	mRNA	15079590	15109700	+	ID=Cucumis_sativus_newGene_631.1;Parent=Cucumis_sativus_newGene_631
chr1	StringTie	exon	15079590	15080082	+	Parent=Cucumis_sativus_newGene_631.1
chr1	StringTie	exon	15108314	15108499	-	Parent=Cucumis_sativus_newGene_630.1
chr1	StringTie	exon	15109584	15109700	+	Parent=Cucumis_sativus_newGene_631.1
chr1	StringTie	gene	15112717	15169838	-	ID=Cucumis_sativus_newGene_632
chr1	StringTie	mRNA	15112717	15140294	-	ID=Cucumis_sativus_newGene_632.1;Parent=Cucumis_sativus_newGene_632
chr1	StringTie	exon	15112717	15112949	-	Parent=Cucumis_sativus_newGene_632.1
chr1	StringTie	gene	15114946	15121185	+	ID=Cucumis_sativus_newGene_635
chr1	StringTie	mRNA	15114946	15121185	+	ID=Cucumis_sativus_newGene_635.1;Parent=Cucumis_sativus_newGene_635
chr1	StringTie	exon	15114946	15115224	+	Parent=Cucumis_sativus_newGene_635.1
chr1	StringTie	gene	15115657	15166806	-	ID=Cucumis_sativus_newGene_636
chr1	StringTie	mRNA	15115657	15165388	-	ID=Cucumis_sativus_newGene_636.1;Parent=Cucumis_sativus_newGene_636
chr1	StringTie	exon	15115657	15115806	-	Parent=Cucumis_sativus_newGene_636.1
chr1	StringTie	mRNA	15117140	15133294	-	ID=Cucumis_sativus_newGene_636.10;Parent=Cucumis_sativus_newGene_636
chr1	StringTie	exon	15117140	15118740	-	Parent=Cucumis_sativus_newGene_636.10
chr1	StringTie	mRNA	15118496	15166806	-	ID=Cucumis_sativus_newGene_636.11;Parent=Cucumis_sativus_newGene_636
chr1	StringTie	exon	15118496	15118931	-	Parent=Cucumis_sativus_newGene_636.11
chr1	StringTie	mRNA	15118740	15166806	-	ID=Cucumis_sativus_newGene_636.12;Parent=Cucumis_sativus_newGene_636
chr1	StringTie	exon	15118740	15118931	-	Parent=Cucumis_sativus_newGene_636.12
chr1	StringTie	mRNA	15118746	15166806	-	ID=Cucumis_sativus_newGene_636.13;Parent=Cucumis_sativus_newGene_636
chr1	StringTie	exon	15118746	15118931	-	Parent=Cucumis_sativus_newGene_636.13
chr1	StringTie	mRNA	15118748	15166806	-	ID=Cucumis_sativus_newGene_636.14;Parent=Cucumis_sativus_newGene_636
chr1	StringTie	exon	15118748	15118931	-	Parent=Cucumis_sativus_newGene_636.14
chr1	StringTie	exon	15119685	15119811	-	Parent=Cucumis_sativus_newGene_632.1
chr1	StringTie	mRNA	15119735	15130938	-	ID=Cucumis_sativus_newGene_632.2;Parent=Cucumis_sativus_newGene_632
chr1	StringTie	exon	15119735	15119811	-	Parent=Cucumis_sativus_newGene_632.2
chr1	StringTie	exon	15119908	15120131	-	Parent=Cucumis_sativus_newGene_632.1
chr1	StringTie	mRNA	15119970	15169838	-	ID=Cucumis_sativus_newGene_632.3;Parent=Cucumis_sativus_newGene_632
chr1	StringTie	exon	15119970	15120131	-	Parent=Cucumis_sativus_newGene_632.3
chr1	StringTie	exon	15120963	15121185	+	Parent=Cucumis_sativus_newGene_635.1
chr1	StringTie	exon	15126819	15126846	-	Parent=Cucumis_sativus_newGene_632.2
chr1	StringTie	exon	15130697	15130938	-	Parent=Cucumis_sativus_newGene_632.2
chr1	StringTie	exon	15133182	15133294	-	Parent=Cucumis_sativus_newGene_636.10
chr1	StringTie	gene	15135389	15154983	+	ID=Cucumis_sativus_newGene_637
chr1	StringTie	mRNA	15135389	15154983	+	ID=Cucumis_sativus_newGene_637.1;Parent=Cucumis_sativus_newGene_637
chr1	StringTie	exon	15135389	15135609	+	Parent=Cucumis_sativus_newGene_637.1
chr1	StringTie	gene	15138115	15144449	-	ID=Cucumis_sativus_newGene_639
chr1	StringTie	mRNA	15138115	15144449	-	ID=Cucumis_sativus_newGene_639.1;Parent=Cucumis_sativus_newGene_639
chr1	StringTie	exon	15138115	15138291	-	Parent=Cucumis_sativus_newGene_639.1
chr1	StringTie	mRNA	15138926	15166806	-	ID=Cucumis_sativus_newGene_636.15;Parent=Cucumis_sativus_newGene_636
chr1	StringTie	exon	15138926	15138980	-	Parent=Cucumis_sativus_newGene_636.15
chr1	StringTie	mRNA	15138926	15166806	-	ID=Cucumis_sativus_newGene_636.16;Parent=Cucumis_sativus_newGene_636
chr1	StringTie	exon	15138926	15138980	-	Parent=Cucumis_sativus_newGene_636.16
chr1	StringTie	exon	15140194	15140294	-	Parent=Cucumis_sativus_newGene_632.1
chr1	StringTie	exon	15144090	15144449	-	Parent=Cucumis_sativus_newGene_639.1
chr1	StringTie	gene	15152314	15190165	-	ID=Cucumis_sativus_newGene_642
chr1	StringTie	mRNA	15152314	15154036	-	ID=Cucumis_sativus_newGene_642.1;Parent=Cucumis_sativus_newGene_642
chr1	StringTie	exon	15152314	15152358	-	Parent=Cucumis_sativus_newGene_642.1
chr1	StringTie	mRNA	15152320	15190165	-	ID=Cucumis_sativus_newGene_642.2;Parent=Cucumis_sativus_newGene_642
chr1	StringTie	exon	15152320	15152358	-	Parent=Cucumis_sativus_newGene_642.2
chr1	StringTie	exon	15153176	15153223	-	Parent=Cucumis_sativus_newGene_642.1
chr1	StringTie	exon	15153303	15154036	-	Parent=Cucumis_sativus_newGene_642.1
chr1	StringTie	gene	15154667	15171072	-	ID=Cucumis_sativus_newGene_644
chr1	StringTie	mRNA	15154667	15171072	-	ID=Cucumis_sativus_newGene_644.1;Parent=Cucumis_sativus_newGene_644
chr1	StringTie	exon	15154667	15154789	-	Parent=Cucumis_sativus_newGene_644.1
chr1	StringTie	exon	15154765	15154983	+	Parent=Cucumis_sativus_newGene_637.1
chr1	StringTie	mRNA	15157935	15166806	-	ID=Cucumis_sativus_newGene_636.17;Parent=Cucumis_sativus_newGene_636
chr1	StringTie	exon	15157935	15158435	-	Parent=Cucumis_sativus_newGene_636.17
chr1	StringTie	mRNA	15157936	15166806	-	ID=Cucumis_sativus_newGene_636.2;Parent=Cucumis_sativus_newGene_636
chr1	StringTie	exon	15157936	15158435	-	Parent=Cucumis_sativus_newGene_636.2
chr1	StringTie	mRNA	15157936	15166806	-	ID=Cucumis_sativus_newGene_636.3;Parent=Cucumis_sativus_newGene_636
chr1	StringTie	exon	15157936	15158435	-	Parent=Cucumis_sativus_newGene_636.3
chr1	StringTie	mRNA	15158022	15166806	-	ID=Cucumis_sativus_newGene_636.4;Parent=Cucumis_sativus_newGene_636
chr1	StringTie	exon	15158022	15158435	-	Parent=Cucumis_sativus_newGene_636.4
chr1	StringTie	mRNA	15159207	15166806	-	ID=Cucumis_sativus_newGene_636.5;Parent=Cucumis_sativus_newGene_636
chr1	StringTie	exon	15159207	15159411	-	Parent=Cucumis_sativus_newGene_636.5
chr1	StringTie	mRNA	15159207	15166806	-	ID=Cucumis_sativus_newGene_636.6;Parent=Cucumis_sativus_newGene_636
chr1	StringTie	exon	15159207	15159411	-	Parent=Cucumis_sativus_newGene_636.6
chr1	StringTie	mRNA	15159207	15166806	-	ID=Cucumis_sativus_newGene_636.7;Parent=Cucumis_sativus_newGene_636
chr1	StringTie	exon	15159207	15159411	-	Parent=Cucumis_sativus_newGene_636.7
chr1	StringTie	mRNA	15159221	15166806	-	ID=Cucumis_sativus_newGene_636.8;Parent=Cucumis_sativus_newGene_636
chr1	StringTie	exon	15159221	15160340	-	Parent=Cucumis_sativus_newGene_636.8
chr1	StringTie	mRNA	15159231	15166806	-	ID=Cucumis_sativus_newGene_636.9;Parent=Cucumis_sativus_newGene_636
chr1	StringTie	exon	15159231	15159411	-	Parent=Cucumis_sativus_newGene_636.9
chr1	StringTie	exon	15159317	15159411	-	Parent=Cucumis_sativus_newGene_636.17
chr1	StringTie	exon	15159317	15159411	-	Parent=Cucumis_sativus_newGene_636.2
chr1	StringTie	exon	15159317	15159411	-	Parent=Cucumis_sativus_newGene_636.3
chr1	StringTie	exon	15159322	15159411	-	Parent=Cucumis_sativus_newGene_636.4
chr1	StringTie	exon	15160135	15160182	-	Parent=Cucumis_sativus_newGene_636.11
chr1	StringTie	exon	15160135	15160182	-	Parent=Cucumis_sativus_newGene_636.12
chr1	StringTie	exon	15160135	15160182	-	Parent=Cucumis_sativus_newGene_636.14
chr1	StringTie	exon	15160135	15160182	-	Parent=Cucumis_sativus_newGene_636.15
chr1	StringTie	exon	15160135	15160182	-	Parent=Cucumis_sativus_newGene_636.16
chr1	StringTie	exon	15160135	15160182	-	Parent=Cucumis_sativus_newGene_636.17
chr1	StringTie	exon	15160135	15160182	-	Parent=Cucumis_sativus_newGene_636.2
chr1	StringTie	exon	15160135	15160182	-	Parent=Cucumis_sativus_newGene_636.5
chr1	StringTie	exon	15160135	15160182	-	Parent=Cucumis_sativus_newGene_636.7
chr1	StringTie	exon	15160135	15160182	-	Parent=Cucumis_sativus_newGene_636.9
chr1	StringTie	exon	15160262	15165388	-	Parent=Cucumis_sativus_newGene_636.12
chr1	StringTie	exon	15160262	15160340	-	Parent=Cucumis_sativus_newGene_636.14
chr1	StringTie	exon	15160262	15166159	-	Parent=Cucumis_sativus_newGene_636.15
chr1	StringTie	exon	15160262	15160670	-	Parent=Cucumis_sativus_newGene_636.17
chr1	StringTie	exon	15160262	15166159	-	Parent=Cucumis_sativus_newGene_636.5
chr1	StringTie	exon	15160262	15165388	-	Parent=Cucumis_sativus_newGene_636.7
chr1	StringTie	exon	15160262	15160340	-	Parent=Cucumis_sativus_newGene_636.9
chr1	StringTie	exon	15162034	15165388	-	Parent=Cucumis_sativus_newGene_636.1
chr1	StringTie	exon	15166112	15166159	-	Parent=Cucumis_sativus_newGene_636.12
chr1	StringTie	exon	15166112	15166159	-	Parent=Cucumis_sativus_newGene_636.13
chr1	StringTie	exon	15166112	15166159	-	Parent=Cucumis_sativus_newGene_636.17
chr1	StringTie	exon	15166112	15166159	-	Parent=Cucumis_sativus_newGene_636.3
chr1	StringTie	exon	15166112	15166159	-	Parent=Cucumis_sativus_newGene_636.4
chr1	StringTie	exon	15166239	15166806	-	Parent=Cucumis_sativus_newGene_636.11
chr1	StringTie	exon	15166239	15166806	-	Parent=Cucumis_sativus_newGene_636.12
chr1	StringTie	exon	15166239	15166806	-	Parent=Cucumis_sativus_newGene_636.13
chr1	StringTie	exon	15166239	15166806	-	Parent=Cucumis_sativus_newGene_636.15
chr1	StringTie	exon	15166239	15166806	-	Parent=Cucumis_sativus_newGene_636.16
chr1	StringTie	exon	15166239	15166806	-	Parent=Cucumis_sativus_newGene_636.17
chr1	StringTie	exon	15166239	15166806	-	Parent=Cucumis_sativus_newGene_636.2
chr1	StringTie	exon	15166239	15166806	-	Parent=Cucumis_sativus_newGene_636.3
chr1	StringTie	exon	15166239	15166806	-	Parent=Cucumis_sativus_newGene_636.4
chr1	StringTie	exon	15166239	15166806	-	Parent=Cucumis_sativus_newGene_636.5
chr1	StringTie	exon	15166239	15166806	-	Parent=Cucumis_sativus_newGene_636.6
chr1	StringTie	exon	15166239	15166806	-	Parent=Cucumis_sativus_newGene_636.7
chr1	StringTie	exon	15166318	15166806	-	Parent=Cucumis_sativus_newGene_636.14
chr1	StringTie	exon	15166318	15166806	-	Parent=Cucumis_sativus_newGene_636.8
chr1	StringTie	exon	15166318	15166806	-	Parent=Cucumis_sativus_newGene_636.9
chr1	StringTie	exon	15169715	15169838	-	Parent=Cucumis_sativus_newGene_632.3
chr1	StringTie	exon	15170814	15171072	-	Parent=Cucumis_sativus_newGene_644.1
chr1	StringTie	exon	15189243	15189987	-	Parent=Cucumis_sativus_newGene_642.2
chr1	StringTie	exon	15190067	15190165	-	Parent=Cucumis_sativus_newGene_642.2
chr1	StringTie	gene	15301206	15302339	-	ID=Cucumis_sativus_newGene_656
chr1	StringTie	mRNA	15301206	15302339	-	ID=Cucumis_sativus_newGene_656.1;Parent=Cucumis_sativus_newGene_656
chr1	StringTie	exon	15301206	15301331	-	Parent=Cucumis_sativus_newGene_656.1
chr1	StringTie	exon	15301575	15302339	-	Parent=Cucumis_sativus_newGene_656.1
chr1	StringTie	gene	15563342	15563849	-	ID=Cucumis_sativus_newGene_682
chr1	StringTie	mRNA	15563342	15563849	-	ID=Cucumis_sativus_newGene_682.1;Parent=Cucumis_sativus_newGene_682
chr1	StringTie	exon	15563342	15563625	-	Parent=Cucumis_sativus_newGene_682.1
chr1	StringTie	exon	15563702	15563849	-	Parent=Cucumis_sativus_newGene_682.1
chr1	StringTie	gene	15646035	15646846	-	ID=Cucumis_sativus_newGene_688
chr1	StringTie	mRNA	15646035	15646846	-	ID=Cucumis_sativus_newGene_688.1;Parent=Cucumis_sativus_newGene_688
chr1	StringTie	exon	15646035	15646375	-	Parent=Cucumis_sativus_newGene_688.1
chr1	StringTie	exon	15646666	15646846	-	Parent=Cucumis_sativus_newGene_688.1
chr1	StringTie	gene	16204776	16211257	-	ID=Cucumis_sativus_newGene_764
chr1	StringTie	mRNA	16204776	16207524	-	ID=Cucumis_sativus_newGene_764.1;Parent=Cucumis_sativus_newGene_764
chr1	StringTie	exon	16204776	16206613	-	Parent=Cucumis_sativus_newGene_764.1
chr1	StringTie	mRNA	16204776	16211257	-	ID=Cucumis_sativus_newGene_764.2;Parent=Cucumis_sativus_newGene_764
chr1	StringTie	exon	16204776	16205468	-	Parent=Cucumis_sativus_newGene_764.2
chr1	StringTie	mRNA	16204794	16211257	-	ID=Cucumis_sativus_newGene_764.3;Parent=Cucumis_sativus_newGene_764
chr1	StringTie	exon	16204794	16205468	-	Parent=Cucumis_sativus_newGene_764.3
chr1	StringTie	mRNA	16204794	16207524	-	ID=Cucumis_sativus_newGene_764.4;Parent=Cucumis_sativus_newGene_764
chr1	StringTie	exon	16204794	16205468	-	Parent=Cucumis_sativus_newGene_764.4
chr1	StringTie	mRNA	16204795	16211257	-	ID=Cucumis_sativus_newGene_764.5;Parent=Cucumis_sativus_newGene_764
chr1	StringTie	exon	16204795	16205468	-	Parent=Cucumis_sativus_newGene_764.5
chr1	StringTie	mRNA	16204943	16207524	-	ID=Cucumis_sativus_newGene_764.6;Parent=Cucumis_sativus_newGene_764
chr1	StringTie	exon	16204943	16206339	-	Parent=Cucumis_sativus_newGene_764.6
chr1	StringTie	mRNA	16204945	16207524	-	ID=Cucumis_sativus_newGene_764.7;Parent=Cucumis_sativus_newGene_764
chr1	StringTie	exon	16204945	16206924	-	Parent=Cucumis_sativus_newGene_764.7
chr1	StringTie	exon	16205561	16205719	-	Parent=Cucumis_sativus_newGene_764.2
chr1	StringTie	exon	16205561	16205719	-	Parent=Cucumis_sativus_newGene_764.3
chr1	StringTie	exon	16205561	16205719	-	Parent=Cucumis_sativus_newGene_764.4
chr1	StringTie	exon	16205561	16205719	-	Parent=Cucumis_sativus_newGene_764.5
chr1	StringTie	exon	16206090	16206339	-	Parent=Cucumis_sativus_newGene_764.3
chr1	StringTie	exon	16206090	16206339	-	Parent=Cucumis_sativus_newGene_764.5
chr1	StringTie	exon	16206497	16206613	-	Parent=Cucumis_sativus_newGene_764.3
chr1	StringTie	exon	16206497	16206613	-	Parent=Cucumis_sativus_newGene_764.4
chr1	StringTie	exon	16206497	16206613	-	Parent=Cucumis_sativus_newGene_764.6
chr1	StringTie	exon	16206856	16206924	-	Parent=Cucumis_sativus_newGene_764.1
chr1	StringTie	exon	16206856	16206924	-	Parent=Cucumis_sativus_newGene_764.2
chr1	StringTie	exon	16206856	16206924	-	Parent=Cucumis_sativus_newGene_764.3
chr1	StringTie	exon	16206856	16206924	-	Parent=Cucumis_sativus_newGene_764.4
chr1	StringTie	exon	16206856	16206924	-	Parent=Cucumis_sativus_newGene_764.5
chr1	StringTie	exon	16206856	16206924	-	Parent=Cucumis_sativus_newGene_764.6
chr1	StringTie	exon	16207037	16207524	-	Parent=Cucumis_sativus_newGene_764.1
chr1	StringTie	exon	16207037	16207269	-	Parent=Cucumis_sativus_newGene_764.2
chr1	StringTie	exon	16207037	16207269	-	Parent=Cucumis_sativus_newGene_764.3
chr1	StringTie	exon	16207037	16207524	-	Parent=Cucumis_sativus_newGene_764.4
chr1	StringTie	exon	16207037	16207269	-	Parent=Cucumis_sativus_newGene_764.5
chr1	StringTie	exon	16207037	16207524	-	Parent=Cucumis_sativus_newGene_764.6
chr1	StringTie	exon	16207037	16207524	-	Parent=Cucumis_sativus_newGene_764.7
chr1	StringTie	exon	16210946	16211257	-	Parent=Cucumis_sativus_newGene_764.2
chr1	StringTie	exon	16210946	16211257	-	Parent=Cucumis_sativus_newGene_764.3
chr1	StringTie	exon	16210946	16211257	-	Parent=Cucumis_sativus_newGene_764.5
chr1	StringTie	gene	16291995	16293888	+	ID=Cucumis_sativus_newGene_773
chr1	StringTie	mRNA	16291995	16293888	+	ID=Cucumis_sativus_newGene_773.1;Parent=Cucumis_sativus_newGene_773
chr1	StringTie	exon	16291995	16292239	+	Parent=Cucumis_sativus_newGene_773.1
chr1	StringTie	mRNA	16292167	16293888	+	ID=Cucumis_sativus_newGene_773.2;Parent=Cucumis_sativus_newGene_773
chr1	StringTie	exon	16292167	16292239	+	Parent=Cucumis_sativus_newGene_773.2
chr1	StringTie	exon	16292352	16292978	+	Parent=Cucumis_sativus_newGene_773.1
chr1	StringTie	exon	16292352	16293140	+	Parent=Cucumis_sativus_newGene_773.2
chr1	StringTie	exon	16293054	16293140	+	Parent=Cucumis_sativus_newGene_773.1
chr1	StringTie	exon	16293214	16293612	+	Parent=Cucumis_sativus_newGene_773.1
chr1	StringTie	exon	16293214	16293888	+	Parent=Cucumis_sativus_newGene_773.2
chr1	StringTie	exon	16293689	16293888	+	Parent=Cucumis_sativus_newGene_773.1
chr1	StringTie	gene	16483316	16483964	+	ID=Cucumis_sativus_newGene_788
chr1	StringTie	mRNA	16483316	16483964	+	ID=Cucumis_sativus_newGene_788.1;Parent=Cucumis_sativus_newGene_788
chr1	StringTie	exon	16483316	16483497	+	Parent=Cucumis_sativus_newGene_788.1
chr1	StringTie	exon	16483581	16483964	+	Parent=Cucumis_sativus_newGene_788.1
chr1	StringTie	gene	16648240	16648781	+	ID=Cucumis_sativus_newGene_798
chr1	StringTie	mRNA	16648240	16648781	+	ID=Cucumis_sativus_newGene_798.1;Parent=Cucumis_sativus_newGene_798
chr1	StringTie	exon	16648240	16648486	+	Parent=Cucumis_sativus_newGene_798.1
chr1	StringTie	exon	16648605	16648781	+	Parent=Cucumis_sativus_newGene_798.1
chr1	StringTie	gene	16894487	16898961	+	ID=Cucumis_sativus_newGene_809
chr1	StringTie	mRNA	16894487	16898644	+	ID=Cucumis_sativus_newGene_809.1;Parent=Cucumis_sativus_newGene_809
chr1	StringTie	exon	16894487	16894751	+	Parent=Cucumis_sativus_newGene_809.1
chr1	StringTie	mRNA	16894487	16898644	+	ID=Cucumis_sativus_newGene_809.3;Parent=Cucumis_sativus_newGene_809
chr1	StringTie	exon	16894487	16895277	+	Parent=Cucumis_sativus_newGene_809.3
chr1	StringTie	mRNA	16894522	16898961	+	ID=Cucumis_sativus_newGene_809.4;Parent=Cucumis_sativus_newGene_809
chr1	StringTie	exon	16894522	16894751	+	Parent=Cucumis_sativus_newGene_809.4
chr1	StringTie	mRNA	16894524	16898961	+	ID=Cucumis_sativus_newGene_809.5;Parent=Cucumis_sativus_newGene_809
chr1	StringTie	exon	16894524	16894751	+	Parent=Cucumis_sativus_newGene_809.5
chr1	StringTie	mRNA	16894564	16898644	+	ID=Cucumis_sativus_newGene_809.6;Parent=Cucumis_sativus_newGene_809
chr1	StringTie	exon	16894564	16895277	+	Parent=Cucumis_sativus_newGene_809.6
chr1	StringTie	mRNA	16894567	16898961	+	ID=Cucumis_sativus_newGene_809.7;Parent=Cucumis_sativus_newGene_809
chr1	StringTie	exon	16894567	16895277	+	Parent=Cucumis_sativus_newGene_809.7
chr1	StringTie	mRNA	16894567	16898961	+	ID=Cucumis_sativus_newGene_809.8;Parent=Cucumis_sativus_newGene_809
chr1	StringTie	exon	16894567	16894751	+	Parent=Cucumis_sativus_newGene_809.8
chr1	StringTie	mRNA	16894580	16898644	+	ID=Cucumis_sativus_newGene_809.9;Parent=Cucumis_sativus_newGene_809
chr1	StringTie	exon	16894580	16894751	+	Parent=Cucumis_sativus_newGene_809.9
chr1	StringTie	mRNA	16895081	16898961	+	ID=Cucumis_sativus_newGene_809.2;Parent=Cucumis_sativus_newGene_809
chr1	StringTie	exon	16895081	16895126	+	Parent=Cucumis_sativus_newGene_809.2
chr1	StringTie	exon	16895207	16895922	+	Parent=Cucumis_sativus_newGene_809.1
chr1	StringTie	exon	16895207	16895277	+	Parent=Cucumis_sativus_newGene_809.2
chr1	StringTie	exon	16895207	16895277	+	Parent=Cucumis_sativus_newGene_809.4
chr1	StringTie	exon	16895207	16895277	+	Parent=Cucumis_sativus_newGene_809.5
chr1	StringTie	exon	16895207	16895277	+	Parent=Cucumis_sativus_newGene_809.8
chr1	StringTie	exon	16896254	16898644	+	Parent=Cucumis_sativus_newGene_809.1
chr1	StringTie	exon	16896254	16896320	+	Parent=Cucumis_sativus_newGene_809.2
chr1	StringTie	exon	16896254	16896320	+	Parent=Cucumis_sativus_newGene_809.3
chr1	StringTie	exon	16896254	16896320	+	Parent=Cucumis_sativus_newGene_809.4
chr1	StringTie	exon	16896254	16896320	+	Parent=Cucumis_sativus_newGene_809.5
chr1	StringTie	exon	16896254	16896320	+	Parent=Cucumis_sativus_newGene_809.6
chr1	StringTie	exon	16896254	16898227	+	Parent=Cucumis_sativus_newGene_809.7
chr1	StringTie	exon	16896254	16896730	+	Parent=Cucumis_sativus_newGene_809.8
chr1	StringTie	exon	16896646	16896730	+	Parent=Cucumis_sativus_newGene_809.4
chr1	StringTie	exon	16896646	16896730	+	Parent=Cucumis_sativus_newGene_809.6
chr1	StringTie	exon	16897054	16897127	+	Parent=Cucumis_sativus_newGene_809.8
chr1	StringTie	exon	16898149	16898227	+	Parent=Cucumis_sativus_newGene_809.2
chr1	StringTie	exon	16898149	16898644	+	Parent=Cucumis_sativus_newGene_809.3
chr1	StringTie	exon	16898149	16898227	+	Parent=Cucumis_sativus_newGene_809.4
chr1	StringTie	exon	16898149	16898227	+	Parent=Cucumis_sativus_newGene_809.5
chr1	StringTie	exon	16898149	16898644	+	Parent=Cucumis_sativus_newGene_809.6
chr1	StringTie	exon	16898149	16898227	+	Parent=Cucumis_sativus_newGene_809.8
chr1	StringTie	exon	16898149	16898644	+	Parent=Cucumis_sativus_newGene_809.9
chr1	StringTie	exon	16898725	16898961	+	Parent=Cucumis_sativus_newGene_809.2
chr1	StringTie	exon	16898725	16898961	+	Parent=Cucumis_sativus_newGene_809.4
chr1	StringTie	exon	16898725	16898961	+	Parent=Cucumis_sativus_newGene_809.5
chr1	StringTie	exon	16898725	16898961	+	Parent=Cucumis_sativus_newGene_809.7
chr1	StringTie	exon	16898725	16898961	+	Parent=Cucumis_sativus_newGene_809.8
chr1	StringTie	gene	16933312	16935295	-	ID=Cucumis_sativus_newGene_811
chr1	StringTie	mRNA	16933312	16935295	-	ID=Cucumis_sativus_newGene_811.1;Parent=Cucumis_sativus_newGene_811
chr1	StringTie	exon	16933312	16933532	-	Parent=Cucumis_sativus_newGene_811.1
chr1	StringTie	mRNA	16933427	16935295	-	ID=Cucumis_sativus_newGene_811.2;Parent=Cucumis_sativus_newGene_811
chr1	StringTie	exon	16933427	16933532	-	Parent=Cucumis_sativus_newGene_811.2
chr1	StringTie	exon	16933712	16933792	-	Parent=Cucumis_sativus_newGene_811.2
chr1	StringTie	exon	16935112	16935295	-	Parent=Cucumis_sativus_newGene_811.2
chr1	StringTie	exon	16935133	16935295	-	Parent=Cucumis_sativus_newGene_811.1
chr1	StringTie	gene	17015342	17016813	+	ID=Cucumis_sativus_newGene_815
chr1	StringTie	mRNA	17015342	17016813	+	ID=Cucumis_sativus_newGene_815.1;Parent=Cucumis_sativus_newGene_815
chr1	StringTie	exon	17015342	17016308	+	Parent=Cucumis_sativus_newGene_815.1
chr1	StringTie	exon	17016393	17016813	+	Parent=Cucumis_sativus_newGene_815.1
chr1	StringTie	gene	17021241	17025218	-	ID=Cucumis_sativus_newGene_816
chr1	StringTie	mRNA	17021241	17025218	-	ID=Cucumis_sativus_newGene_816.1;Parent=Cucumis_sativus_newGene_816
chr1	StringTie	exon	17021241	17021695	-	Parent=Cucumis_sativus_newGene_816.1
chr1	StringTie	exon	17022458	17023835	-	Parent=Cucumis_sativus_newGene_816.1
chr1	StringTie	exon	17024718	17024776	-	Parent=Cucumis_sativus_newGene_816.1
chr1	StringTie	exon	17025113	17025218	-	Parent=Cucumis_sativus_newGene_816.1
chr1	StringTie	gene	17083464	17084638	-	ID=Cucumis_sativus_newGene_817
chr1	StringTie	mRNA	17083702	17084638	-	ID=Cucumis_sativus_newGene_817.2;Parent=Cucumis_sativus_newGene_817
chr1	StringTie	exon	17083702	17083846	-	Parent=Cucumis_sativus_newGene_817.2
chr1	StringTie	exon	17084002	17084176	-	Parent=Cucumis_sativus_newGene_817.2
chr1	StringTie	exon	17084450	17084638	-	Parent=Cucumis_sativus_newGene_817.2
chr1	StringTie	gene	17492232	17493671	-	ID=Cucumis_sativus_newGene_823
chr1	StringTie	mRNA	17492232	17493671	-	ID=Cucumis_sativus_newGene_823.1;Parent=Cucumis_sativus_newGene_823
chr1	StringTie	exon	17492232	17492264	-	Parent=Cucumis_sativus_newGene_823.1
chr1	StringTie	exon	17493273	17493352	-	Parent=Cucumis_sativus_newGene_823.1
chr1	StringTie	exon	17493457	17493671	-	Parent=Cucumis_sativus_newGene_823.1
chr1	StringTie	gene	17583170	17585198	-	ID=Cucumis_sativus_newGene_828
chr1	StringTie	mRNA	17583170	17585198	-	ID=Cucumis_sativus_newGene_828.1;Parent=Cucumis_sativus_newGene_828
chr1	StringTie	exon	17583170	17583889	-	Parent=Cucumis_sativus_newGene_828.1
chr1	StringTie	exon	17585104	17585198	-	Parent=Cucumis_sativus_newGene_828.1
chr1	StringTie	gene	17593092	17597275	-	ID=Cucumis_sativus_newGene_829
chr1	StringTie	mRNA	17593092	17597275	-	ID=Cucumis_sativus_newGene_829.1;Parent=Cucumis_sativus_newGene_829
chr1	StringTie	exon	17593092	17593309	-	Parent=Cucumis_sativus_newGene_829.1
chr1	StringTie	exon	17597202	17597275	-	Parent=Cucumis_sativus_newGene_829.1
chr1	StringTie	gene	17620444	17631020	+	ID=Cucumis_sativus_newGene_830
chr1	StringTie	mRNA	17620444	17631020	+	ID=Cucumis_sativus_newGene_830.1;Parent=Cucumis_sativus_newGene_830
chr1	StringTie	exon	17620444	17620828	+	Parent=Cucumis_sativus_newGene_830.1
chr1	StringTie	mRNA	17620449	17631020	+	ID=Cucumis_sativus_newGene_830.2;Parent=Cucumis_sativus_newGene_830
chr1	StringTie	exon	17620449	17620828	+	Parent=Cucumis_sativus_newGene_830.2
chr1	StringTie	mRNA	17620449	17622907	+	ID=Cucumis_sativus_newGene_830.3;Parent=Cucumis_sativus_newGene_830
chr1	StringTie	exon	17620449	17620828	+	Parent=Cucumis_sativus_newGene_830.3
chr1	StringTie	mRNA	17620460	17622907	+	ID=Cucumis_sativus_newGene_830.4;Parent=Cucumis_sativus_newGene_830
chr1	StringTie	exon	17620460	17620828	+	Parent=Cucumis_sativus_newGene_830.4
chr1	StringTie	mRNA	17620492	17622907	+	ID=Cucumis_sativus_newGene_830.5;Parent=Cucumis_sativus_newGene_830
chr1	StringTie	exon	17620492	17620828	+	Parent=Cucumis_sativus_newGene_830.5
chr1	StringTie	exon	17620938	17621149	+	Parent=Cucumis_sativus_newGene_830.1
chr1	StringTie	exon	17620938	17621014	+	Parent=Cucumis_sativus_newGene_830.2
chr1	StringTie	exon	17620938	17621014	+	Parent=Cucumis_sativus_newGene_830.3
chr1	StringTie	exon	17620938	17621014	+	Parent=Cucumis_sativus_newGene_830.4
chr1	StringTie	exon	17620938	17622380	+	Parent=Cucumis_sativus_newGene_830.5
chr1	StringTie	exon	17621099	17621149	+	Parent=Cucumis_sativus_newGene_830.2
chr1	StringTie	exon	17621099	17621149	+	Parent=Cucumis_sativus_newGene_830.3
chr1	StringTie	exon	17621114	17622380	+	Parent=Cucumis_sativus_newGene_830.4
chr1	StringTie	exon	17622490	17622907	+	Parent=Cucumis_sativus_newGene_830.3
chr1	StringTie	exon	17622490	17622907	+	Parent=Cucumis_sativus_newGene_830.4
chr1	StringTie	exon	17622490	17622907	+	Parent=Cucumis_sativus_newGene_830.5
chr1	StringTie	exon	17630430	17631020	+	Parent=Cucumis_sativus_newGene_830.2
chr1	StringTie	exon	17630479	17631020	+	Parent=Cucumis_sativus_newGene_830.1
chr1	StringTie	gene	17645097	17645527	+	ID=Cucumis_sativus_newGene_831
chr1	StringTie	mRNA	17645097	17645527	+	ID=Cucumis_sativus_newGene_831.1;Parent=Cucumis_sativus_newGene_831
chr1	StringTie	exon	17645097	17645170	+	Parent=Cucumis_sativus_newGene_831.1
chr1	StringTie	exon	17645288	17645527	+	Parent=Cucumis_sativus_newGene_831.1
chr1	StringTie	gene	18369778	18370335	+	ID=Cucumis_sativus_newGene_854
chr1	StringTie	mRNA	18369778	18370335	+	ID=Cucumis_sativus_newGene_854.1;Parent=Cucumis_sativus_newGene_854
chr1	StringTie	exon	18369778	18370118	+	Parent=Cucumis_sativus_newGene_854.1
chr1	StringTie	exon	18370196	18370335	+	Parent=Cucumis_sativus_newGene_854.1
chr1	StringTie	gene	18377644	18382750	-	ID=Cucumis_sativus_newGene_853
chr1	StringTie	mRNA	18377644	18382750	-	ID=Cucumis_sativus_newGene_853.2;Parent=Cucumis_sativus_newGene_853
chr1	StringTie	exon	18377644	18380067	-	Parent=Cucumis_sativus_newGene_853.2
chr1	StringTie	mRNA	18377751	18382750	-	ID=Cucumis_sativus_newGene_853.3;Parent=Cucumis_sativus_newGene_853
chr1	StringTie	exon	18377751	18380067	-	Parent=Cucumis_sativus_newGene_853.3
chr1	StringTie	mRNA	18377811	18382750	-	ID=Cucumis_sativus_newGene_853.4;Parent=Cucumis_sativus_newGene_853
chr1	StringTie	exon	18377811	18380067	-	Parent=Cucumis_sativus_newGene_853.4
chr1	StringTie	mRNA	18377982	18382750	-	ID=Cucumis_sativus_newGene_853.1;Parent=Cucumis_sativus_newGene_853
chr1	StringTie	exon	18377982	18380067	-	Parent=Cucumis_sativus_newGene_853.1
chr1	StringTie	exon	18380183	18380265	-	Parent=Cucumis_sativus_newGene_853.1
chr1	StringTie	exon	18380183	18380265	-	Parent=Cucumis_sativus_newGene_853.2
chr1	StringTie	exon	18380183	18380265	-	Parent=Cucumis_sativus_newGene_853.3
chr1	StringTie	exon	18380183	18380265	-	Parent=Cucumis_sativus_newGene_853.4
chr1	StringTie	exon	18381309	18382750	-	Parent=Cucumis_sativus_newGene_853.1
chr1	StringTie	exon	18381309	18381444	-	Parent=Cucumis_sativus_newGene_853.2
chr1	StringTie	exon	18381309	18381444	-	Parent=Cucumis_sativus_newGene_853.3
chr1	StringTie	exon	18381309	18381444	-	Parent=Cucumis_sativus_newGene_853.4
chr1	StringTie	exon	18381717	18382750	-	Parent=Cucumis_sativus_newGene_853.4
chr1	StringTie	exon	18382307	18382750	-	Parent=Cucumis_sativus_newGene_853.3
chr1	StringTie	exon	18382363	18382750	-	Parent=Cucumis_sativus_newGene_853.2
chr1	StringTie	gene	18408819	18409733	-	ID=Cucumis_sativus_newGene_856
chr1	StringTie	mRNA	18408819	18409733	-	ID=Cucumis_sativus_newGene_856.1;Parent=Cucumis_sativus_newGene_856
chr1	StringTie	exon	18408819	18408891	-	Parent=Cucumis_sativus_newGene_856.1
chr1	StringTie	mRNA	18409211	18409733	-	ID=Cucumis_sativus_newGene_856.2;Parent=Cucumis_sativus_newGene_856
chr1	StringTie	exon	18409211	18409370	-	Parent=Cucumis_sativus_newGene_856.2
chr1	StringTie	exon	18409497	18409733	-	Parent=Cucumis_sativus_newGene_856.1
chr1	StringTie	exon	18409497	18409733	-	Parent=Cucumis_sativus_newGene_856.2
chr1	StringTie	gene	19241371	19243386	-	ID=Cucumis_sativus_newGene_940
chr1	StringTie	mRNA	19241371	19243386	-	ID=Cucumis_sativus_newGene_940.1;Parent=Cucumis_sativus_newGene_940
chr1	StringTie	exon	19241371	19241785	-	Parent=Cucumis_sativus_newGene_940.1
chr1	StringTie	mRNA	19241583	19243386	-	ID=Cucumis_sativus_newGene_940.2;Parent=Cucumis_sativus_newGene_940
chr1	StringTie	exon	19241583	19241785	-	Parent=Cucumis_sativus_newGene_940.2
chr1	StringTie	exon	19241971	19242071	-	Parent=Cucumis_sativus_newGene_940.2
chr1	StringTie	exon	19242946	19243386	-	Parent=Cucumis_sativus_newGene_940.1
chr1	StringTie	exon	19242946	19243386	-	Parent=Cucumis_sativus_newGene_940.2
chr1	StringTie	gene	19544428	19547130	-	ID=Cucumis_sativus_newGene_973
chr1	StringTie	mRNA	19544428	19547130	-	ID=Cucumis_sativus_newGene_973.1;Parent=Cucumis_sativus_newGene_973
chr1	StringTie	exon	19544428	19544665	-	Parent=Cucumis_sativus_newGene_973.1
chr1	StringTie	mRNA	19544447	19547130	-	ID=Cucumis_sativus_newGene_973.2;Parent=Cucumis_sativus_newGene_973
chr1	StringTie	exon	19544447	19544665	-	Parent=Cucumis_sativus_newGene_973.2
chr1	StringTie	mRNA	19544522	19547130	-	ID=Cucumis_sativus_newGene_973.3;Parent=Cucumis_sativus_newGene_973
chr1	StringTie	exon	19544522	19544665	-	Parent=Cucumis_sativus_newGene_973.3
chr1	StringTie	exon	19545848	19545898	-	Parent=Cucumis_sativus_newGene_973.1
chr1	StringTie	exon	19545848	19545898	-	Parent=Cucumis_sativus_newGene_973.2
chr1	StringTie	exon	19545848	19545898	-	Parent=Cucumis_sativus_newGene_973.3
chr1	StringTie	exon	19546569	19547130	-	Parent=Cucumis_sativus_newGene_973.1
chr1	StringTie	exon	19546569	19546644	-	Parent=Cucumis_sativus_newGene_973.3
chr1	StringTie	exon	19546744	19547130	-	Parent=Cucumis_sativus_newGene_973.2
chr1	StringTie	exon	19546744	19547130	-	Parent=Cucumis_sativus_newGene_973.3
chr1	StringTie	gene	19583804	19585303	+	ID=Cucumis_sativus_newGene_979
chr1	StringTie	mRNA	19583804	19585303	+	ID=Cucumis_sativus_newGene_979.1;Parent=Cucumis_sativus_newGene_979
chr1	StringTie	exon	19583804	19584121	+	Parent=Cucumis_sativus_newGene_979.1
chr1	StringTie	exon	19584963	19585303	+	Parent=Cucumis_sativus_newGene_979.1
chr1	StringTie	gene	19713761	19718704	-	ID=Cucumis_sativus_newGene_993
chr1	StringTie	mRNA	19713761	19718704	-	ID=Cucumis_sativus_newGene_993.1;Parent=Cucumis_sativus_newGene_993
chr1	StringTie	exon	19713761	19713798	-	Parent=Cucumis_sativus_newGene_993.1
chr1	StringTie	mRNA	19714431	19718704	-	ID=Cucumis_sativus_newGene_993.2;Parent=Cucumis_sativus_newGene_993
chr1	StringTie	exon	19714431	19714616	-	Parent=Cucumis_sativus_newGene_993.2
chr1	StringTie	exon	19718164	19718704	-	Parent=Cucumis_sativus_newGene_993.1
chr1	StringTie	exon	19718164	19718704	-	Parent=Cucumis_sativus_newGene_993.2
chr1	StringTie	gene	19894122	19896837	+	ID=Cucumis_sativus_newGene_1013
chr1	StringTie	mRNA	19894122	19896837	+	ID=Cucumis_sativus_newGene_1013.1;Parent=Cucumis_sativus_newGene_1013
chr1	StringTie	exon	19894122	19894384	+	Parent=Cucumis_sativus_newGene_1013.1
chr1	StringTie	mRNA	19894122	19896837	+	ID=Cucumis_sativus_newGene_1013.2;Parent=Cucumis_sativus_newGene_1013
chr1	StringTie	exon	19894122	19894384	+	Parent=Cucumis_sativus_newGene_1013.2
chr1	StringTie	mRNA	19894122	19896837	+	ID=Cucumis_sativus_newGene_1013.3;Parent=Cucumis_sativus_newGene_1013
chr1	StringTie	exon	19894122	19894384	+	Parent=Cucumis_sativus_newGene_1013.3
chr1	StringTie	mRNA	19894142	19896837	+	ID=Cucumis_sativus_newGene_1013.4;Parent=Cucumis_sativus_newGene_1013
chr1	StringTie	exon	19894142	19894384	+	Parent=Cucumis_sativus_newGene_1013.4
chr1	StringTie	exon	19895995	19896837	+	Parent=Cucumis_sativus_newGene_1013.4
chr1	StringTie	exon	19896073	19896837	+	Parent=Cucumis_sativus_newGene_1013.1
chr1	StringTie	exon	19896073	19896217	+	Parent=Cucumis_sativus_newGene_1013.2
chr1	StringTie	exon	19896073	19896217	+	Parent=Cucumis_sativus_newGene_1013.3
chr1	StringTie	exon	19896302	19896837	+	Parent=Cucumis_sativus_newGene_1013.2
chr1	StringTie	exon	19896344	19896837	+	Parent=Cucumis_sativus_newGene_1013.3
chr1	StringTie	gene	19947321	19948525	-	ID=Cucumis_sativus_newGene_1020
chr1	StringTie	mRNA	19947321	19948525	-	ID=Cucumis_sativus_newGene_1020.1;Parent=Cucumis_sativus_newGene_1020
chr1	StringTie	exon	19947321	19947419	-	Parent=Cucumis_sativus_newGene_1020.1
chr1	StringTie	exon	19948347	19948525	-	Parent=Cucumis_sativus_newGene_1020.1
chr1	StringTie	gene	20125058	20130713	+	ID=Cucumis_sativus_newGene_1028
chr1	StringTie	mRNA	20125058	20130713	+	ID=Cucumis_sativus_newGene_1028.1;Parent=Cucumis_sativus_newGene_1028
chr1	StringTie	exon	20125058	20125389	+	Parent=Cucumis_sativus_newGene_1028.1
chr1	StringTie	exon	20126240	20126374	+	Parent=Cucumis_sativus_newGene_1028.1
chr1	StringTie	exon	20126542	20126565	+	Parent=Cucumis_sativus_newGene_1028.1
chr1	StringTie	exon	20126712	20126823	+	Parent=Cucumis_sativus_newGene_1028.1
chr1	StringTie	exon	20127339	20127464	+	Parent=Cucumis_sativus_newGene_1028.1
chr1	StringTie	exon	20127573	20127622	+	Parent=Cucumis_sativus_newGene_1028.1
chr1	StringTie	exon	20128111	20128269	+	Parent=Cucumis_sativus_newGene_1028.1
chr1	StringTie	exon	20128379	20128474	+	Parent=Cucumis_sativus_newGene_1028.1
chr1	StringTie	exon	20128556	20128671	+	Parent=Cucumis_sativus_newGene_1028.1
chr1	StringTie	exon	20128765	20128888	+	Parent=Cucumis_sativus_newGene_1028.1
chr1	StringTie	exon	20129001	20129114	+	Parent=Cucumis_sativus_newGene_1028.1
chr1	StringTie	exon	20129307	20129387	+	Parent=Cucumis_sativus_newGene_1028.1
chr1	StringTie	exon	20130162	20130713	+	Parent=Cucumis_sativus_newGene_1028.1
chr1	StringTie	gene	20620271	20621284	+	ID=Cucumis_sativus_newGene_1045
chr1	StringTie	mRNA	20620271	20621284	+	ID=Cucumis_sativus_newGene_1045.1;Parent=Cucumis_sativus_newGene_1045
chr1	StringTie	exon	20620271	20620686	+	Parent=Cucumis_sativus_newGene_1045.1
chr1	StringTie	exon	20620824	20621284	+	Parent=Cucumis_sativus_newGene_1045.1
chr1	StringTie	gene	20812433	20813446	-	ID=Cucumis_sativus_newGene_1076
chr1	StringTie	mRNA	20812433	20813446	-	ID=Cucumis_sativus_newGene_1076.1;Parent=Cucumis_sativus_newGene_1076
chr1	StringTie	exon	20812433	20812678	-	Parent=Cucumis_sativus_newGene_1076.1
chr1	StringTie	exon	20813409	20813446	-	Parent=Cucumis_sativus_newGene_1076.1
chr1	StringTie	gene	20816230	20816963	-	ID=Cucumis_sativus_newGene_1077
chr1	StringTie	mRNA	20816230	20816963	-	ID=Cucumis_sativus_newGene_1077.1;Parent=Cucumis_sativus_newGene_1077
chr1	StringTie	exon	20816230	20816308	-	Parent=Cucumis_sativus_newGene_1077.1
chr1	StringTie	exon	20816563	20816638	-	Parent=Cucumis_sativus_newGene_1077.1
chr1	StringTie	exon	20816841	20816963	-	Parent=Cucumis_sativus_newGene_1077.1
chr1	StringTie	gene	21058996	21061998	+	ID=Cucumis_sativus_newGene_1127
chr1	StringTie	mRNA	21058996	21061998	+	ID=Cucumis_sativus_newGene_1127.1;Parent=Cucumis_sativus_newGene_1127
chr1	StringTie	exon	21058996	21059425	+	Parent=Cucumis_sativus_newGene_1127.1
chr1	StringTie	exon	21061853	21061998	+	Parent=Cucumis_sativus_newGene_1127.1
chr1	StringTie	gene	21109404	21110912	-	ID=Cucumis_sativus_newGene_1130
chr1	StringTie	mRNA	21109404	21110912	-	ID=Cucumis_sativus_newGene_1130.1;Parent=Cucumis_sativus_newGene_1130
chr1	StringTie	exon	21109404	21109516	-	Parent=Cucumis_sativus_newGene_1130.1
chr1	StringTie	mRNA	21109404	21110912	-	ID=Cucumis_sativus_newGene_1130.2;Parent=Cucumis_sativus_newGene_1130
chr1	StringTie	exon	21109404	21109516	-	Parent=Cucumis_sativus_newGene_1130.2
chr1	StringTie	exon	21109625	21110448	-	Parent=Cucumis_sativus_newGene_1130.1
chr1	StringTie	mRNA	21110002	21110912	-	ID=Cucumis_sativus_newGene_1130.3;Parent=Cucumis_sativus_newGene_1130
chr1	StringTie	exon	21110002	21110448	-	Parent=Cucumis_sativus_newGene_1130.3
chr1	StringTie	exon	21110370	21110448	-	Parent=Cucumis_sativus_newGene_1130.2
chr1	StringTie	exon	21110529	21110912	-	Parent=Cucumis_sativus_newGene_1130.3
chr1	StringTie	exon	21110539	21110912	-	Parent=Cucumis_sativus_newGene_1130.1
chr1	StringTie	exon	21110539	21110912	-	Parent=Cucumis_sativus_newGene_1130.2
chr1	StringTie	gene	21240922	21243344	+	ID=Cucumis_sativus_newGene_1135
chr1	StringTie	mRNA	21240932	21242738	+	ID=Cucumis_sativus_newGene_1135.2;Parent=Cucumis_sativus_newGene_1135
chr1	StringTie	exon	21240932	21242203	+	Parent=Cucumis_sativus_newGene_1135.2
chr1	StringTie	mRNA	21240938	21243344	+	ID=Cucumis_sativus_newGene_1135.3;Parent=Cucumis_sativus_newGene_1135
chr1	StringTie	exon	21240938	21241412	+	Parent=Cucumis_sativus_newGene_1135.3
chr1	StringTie	mRNA	21240943	21242738	+	ID=Cucumis_sativus_newGene_1135.4;Parent=Cucumis_sativus_newGene_1135
chr1	StringTie	exon	21240943	21241412	+	Parent=Cucumis_sativus_newGene_1135.4
chr1	StringTie	mRNA	21240947	21242738	+	ID=Cucumis_sativus_newGene_1135.5;Parent=Cucumis_sativus_newGene_1135
chr1	StringTie	exon	21240947	21241412	+	Parent=Cucumis_sativus_newGene_1135.5
chr1	StringTie	mRNA	21240948	21242436	+	ID=Cucumis_sativus_newGene_1135.6;Parent=Cucumis_sativus_newGene_1135
chr1	StringTie	exon	21240948	21241412	+	Parent=Cucumis_sativus_newGene_1135.6
chr1	StringTie	mRNA	21240965	21243344	+	ID=Cucumis_sativus_newGene_1135.7;Parent=Cucumis_sativus_newGene_1135
chr1	StringTie	exon	21240965	21241412	+	Parent=Cucumis_sativus_newGene_1135.7
chr1	StringTie	mRNA	21240965	21242738	+	ID=Cucumis_sativus_newGene_1135.8;Parent=Cucumis_sativus_newGene_1135
chr1	StringTie	exon	21240965	21241412	+	Parent=Cucumis_sativus_newGene_1135.8
chr1	StringTie	exon	21241859	21242738	+	Parent=Cucumis_sativus_newGene_1135.5
chr1	StringTie	exon	21241859	21242203	+	Parent=Cucumis_sativus_newGene_1135.8
chr1	StringTie	exon	21241963	21242203	+	Parent=Cucumis_sativus_newGene_1135.3
chr1	StringTie	exon	21241963	21242436	+	Parent=Cucumis_sativus_newGene_1135.6
chr1	StringTie	exon	21241963	21242203	+	Parent=Cucumis_sativus_newGene_1135.7
chr1	StringTie	exon	21241984	21242203	+	Parent=Cucumis_sativus_newGene_1135.4
chr1	StringTie	exon	21242305	21242738	+	Parent=Cucumis_sativus_newGene_1135.2
chr1	StringTie	exon	21242305	21242456	+	Parent=Cucumis_sativus_newGene_1135.3
chr1	StringTie	exon	21242305	21242738	+	Parent=Cucumis_sativus_newGene_1135.4
chr1	StringTie	exon	21242305	21242436	+	Parent=Cucumis_sativus_newGene_1135.7
chr1	StringTie	exon	21242305	21242738	+	Parent=Cucumis_sativus_newGene_1135.8
chr1	StringTie	exon	21243168	21243344	+	Parent=Cucumis_sativus_newGene_1135.3
chr1	StringTie	exon	21243168	21243344	+	Parent=Cucumis_sativus_newGene_1135.7
chr1	StringTie	gene	21369779	21377609	+	ID=Cucumis_sativus_newGene_1160
chr1	StringTie	mRNA	21369779	21377609	+	ID=Cucumis_sativus_newGene_1160.1;Parent=Cucumis_sativus_newGene_1160
chr1	StringTie	exon	21369779	21371488	+	Parent=Cucumis_sativus_newGene_1160.1
chr1	StringTie	mRNA	21369779	21377609	+	ID=Cucumis_sativus_newGene_1160.7;Parent=Cucumis_sativus_newGene_1160
chr1	StringTie	exon	21369779	21371199	+	Parent=Cucumis_sativus_newGene_1160.7
chr1	StringTie	mRNA	21369779	21377609	+	ID=Cucumis_sativus_newGene_1160.8;Parent=Cucumis_sativus_newGene_1160
chr1	StringTie	exon	21369779	21370447	+	Parent=Cucumis_sativus_newGene_1160.8
chr1	StringTie	mRNA	21369779	21377609	+	ID=Cucumis_sativus_newGene_1160.9;Parent=Cucumis_sativus_newGene_1160
chr1	StringTie	exon	21369779	21370660	+	Parent=Cucumis_sativus_newGene_1160.9
chr1	StringTie	gene	21369821	21377527	-	ID=Cucumis_sativus_newGene_1165
chr1	StringTie	mRNA	21369821	21377527	-	ID=Cucumis_sativus_newGene_1165.1;Parent=Cucumis_sativus_newGene_1165
chr1	StringTie	exon	21369821	21371079	-	Parent=Cucumis_sativus_newGene_1165.1
chr1	StringTie	mRNA	21369821	21377527	-	ID=Cucumis_sativus_newGene_1165.2;Parent=Cucumis_sativus_newGene_1165
chr1	StringTie	exon	21369821	21370220	-	Parent=Cucumis_sativus_newGene_1165.2
chr1	StringTie	mRNA	21369825	21377527	-	ID=Cucumis_sativus_newGene_1165.3;Parent=Cucumis_sativus_newGene_1165
chr1	StringTie	exon	21369825	21370244	-	Parent=Cucumis_sativus_newGene_1165.3
chr1	StringTie	mRNA	21369825	21377527	-	ID=Cucumis_sativus_newGene_1165.4;Parent=Cucumis_sativus_newGene_1165
chr1	StringTie	exon	21369825	21370028	-	Parent=Cucumis_sativus_newGene_1165.4
chr1	StringTie	mRNA	21369828	21377609	+	ID=Cucumis_sativus_newGene_1160.10;Parent=Cucumis_sativus_newGene_1160
chr1	StringTie	exon	21369828	21370392	+	Parent=Cucumis_sativus_newGene_1160.10
chr1	StringTie	mRNA	21369828	21377609	+	ID=Cucumis_sativus_newGene_1160.11;Parent=Cucumis_sativus_newGene_1160
chr1	StringTie	exon	21369828	21370525	+	Parent=Cucumis_sativus_newGene_1160.11
chr1	StringTie	mRNA	21369828	21377609	+	ID=Cucumis_sativus_newGene_1160.12;Parent=Cucumis_sativus_newGene_1160
chr1	StringTie	exon	21369828	21370525	+	Parent=Cucumis_sativus_newGene_1160.12
chr1	StringTie	mRNA	21369828	21377527	-	ID=Cucumis_sativus_newGene_1165.5;Parent=Cucumis_sativus_newGene_1165
chr1	StringTie	exon	21369828	21370028	-	Parent=Cucumis_sativus_newGene_1165.5
chr1	StringTie	exon	21370051	21371079	-	Parent=Cucumis_sativus_newGene_1165.5
chr1	StringTie	mRNA	21370298	21377609	+	ID=Cucumis_sativus_newGene_1160.13;Parent=Cucumis_sativus_newGene_1160
chr1	StringTie	exon	21370298	21370323	+	Parent=Cucumis_sativus_newGene_1160.13
chr1	StringTie	mRNA	21370299	21377609	+	ID=Cucumis_sativus_newGene_1160.14;Parent=Cucumis_sativus_newGene_1160
chr1	StringTie	exon	21370299	21370323	+	Parent=Cucumis_sativus_newGene_1160.14
chr1	StringTie	mRNA	21370299	21377609	+	ID=Cucumis_sativus_newGene_1160.2;Parent=Cucumis_sativus_newGene_1160
chr1	StringTie	exon	21370299	21370323	+	Parent=Cucumis_sativus_newGene_1160.2
chr1	StringTie	mRNA	21370299	21377609	+	ID=Cucumis_sativus_newGene_1160.3;Parent=Cucumis_sativus_newGene_1160
chr1	StringTie	exon	21370299	21370323	+	Parent=Cucumis_sativus_newGene_1160.3
chr1	StringTie	exon	21370448	21370525	+	Parent=Cucumis_sativus_newGene_1160.2
chr1	StringTie	exon	21370448	21370525	+	Parent=Cucumis_sativus_newGene_1160.3
chr1	StringTie	exon	21370611	21370660	+	Parent=Cucumis_sativus_newGene_1160.11
chr1	StringTie	mRNA	21375542	21377527	-	ID=Cucumis_sativus_newGene_1165.8;Parent=Cucumis_sativus_newGene_1165
chr1	StringTie	exon	21375542	21375785	-	Parent=Cucumis_sativus_newGene_1165.8
chr1	StringTie	exon	21375786	21377527	-	Parent=Cucumis_sativus_newGene_1165.4
chr1	StringTie	exon	21375808	21377527	-	Parent=Cucumis_sativus_newGene_1165.8
chr1	StringTie	exon	21375978	21377527	-	Parent=Cucumis_sativus_newGene_1165.2
chr1	StringTie	exon	21376002	21377527	-	Parent=Cucumis_sativus_newGene_1165.3
chr1	StringTie	mRNA	21376030	21377609	+	ID=Cucumis_sativus_newGene_1160.4;Parent=Cucumis_sativus_newGene_1160
chr1	StringTie	exon	21376030	21376080	+	Parent=Cucumis_sativus_newGene_1160.4
chr1	StringTie	mRNA	21376030	21377609	+	ID=Cucumis_sativus_newGene_1160.5;Parent=Cucumis_sativus_newGene_1160
chr1	StringTie	exon	21376030	21376080	+	Parent=Cucumis_sativus_newGene_1160.5
chr1	StringTie	mRNA	21376042	21377609	+	ID=Cucumis_sativus_newGene_1160.6;Parent=Cucumis_sativus_newGene_1160
chr1	StringTie	exon	21376042	21376080	+	Parent=Cucumis_sativus_newGene_1160.6
chr1	StringTie	exon	21376150	21377609	+	Parent=Cucumis_sativus_newGene_1160.10
chr1	StringTie	exon	21376205	21376282	+	Parent=Cucumis_sativus_newGene_1160.13
chr1	StringTie	exon	21376205	21376282	+	Parent=Cucumis_sativus_newGene_1160.14
chr1	StringTie	exon	21376205	21377609	+	Parent=Cucumis_sativus_newGene_1160.4
chr1	StringTie	exon	21376205	21376282	+	Parent=Cucumis_sativus_newGene_1160.5
chr1	StringTie	exon	21376205	21376282	+	Parent=Cucumis_sativus_newGene_1160.6
chr1	StringTie	exon	21376205	21377609	+	Parent=Cucumis_sativus_newGene_1160.8
chr1	StringTie	exon	21376368	21376417	+	Parent=Cucumis_sativus_newGene_1160.12
chr1	StringTie	exon	21376368	21376417	+	Parent=Cucumis_sativus_newGene_1160.13
chr1	StringTie	exon	21376368	21377609	+	Parent=Cucumis_sativus_newGene_1160.14
chr1	StringTie	exon	21376368	21377609	+	Parent=Cucumis_sativus_newGene_1160.2
chr1	StringTie	exon	21376368	21376417	+	Parent=Cucumis_sativus_newGene_1160.3
chr1	StringTie	exon	21376368	21376417	+	Parent=Cucumis_sativus_newGene_1160.5
chr1	StringTie	exon	21376368	21377609	+	Parent=Cucumis_sativus_newGene_1160.6
chr1	StringTie	exon	21376418	21377609	+	Parent=Cucumis_sativus_newGene_1160.9
chr1	StringTie	exon	21376837	21377527	-	Parent=Cucumis_sativus_newGene_1165.1
chr1	StringTie	exon	21376837	21377527	-	Parent=Cucumis_sativus_newGene_1165.5
chr1	StringTie	exon	21376956	21377609	+	Parent=Cucumis_sativus_newGene_1160.7
chr1	StringTie	exon	21377239	21377609	+	Parent=Cucumis_sativus_newGene_1160.11
chr1	StringTie	exon	21377239	21377609	+	Parent=Cucumis_sativus_newGene_1160.12
chr1	StringTie	exon	21377239	21377609	+	Parent=Cucumis_sativus_newGene_1160.13
chr1	StringTie	exon	21377239	21377609	+	Parent=Cucumis_sativus_newGene_1160.3
chr1	StringTie	exon	21377239	21377609	+	Parent=Cucumis_sativus_newGene_1160.5
chr1	StringTie	exon	21377245	21377609	+	Parent=Cucumis_sativus_newGene_1160.1
chr1	StringTie	gene	21405607	21406172	+	ID=Cucumis_sativus_newGene_1178
chr1	StringTie	mRNA	21405607	21406172	+	ID=Cucumis_sativus_newGene_1178.1;Parent=Cucumis_sativus_newGene_1178
chr1	StringTie	exon	21405607	21405747	+	Parent=Cucumis_sativus_newGene_1178.1
chr1	StringTie	exon	21405898	21406172	+	Parent=Cucumis_sativus_newGene_1178.1
chr1	StringTie	gene	21412327	21412915	+	ID=Cucumis_sativus_newGene_1181
chr1	StringTie	mRNA	21412327	21412915	+	ID=Cucumis_sativus_newGene_1181.1;Parent=Cucumis_sativus_newGene_1181
chr1	StringTie	exon	21412327	21412467	+	Parent=Cucumis_sativus_newGene_1181.1
chr1	StringTie	exon	21412618	21412915	+	Parent=Cucumis_sativus_newGene_1181.1
chr1	StringTie	gene	21416944	21417688	+	ID=Cucumis_sativus_newGene_1187
chr1	StringTie	mRNA	21416944	21417688	+	ID=Cucumis_sativus_newGene_1187.1;Parent=Cucumis_sativus_newGene_1187
chr1	StringTie	exon	21416944	21417107	+	Parent=Cucumis_sativus_newGene_1187.1
chr1	StringTie	exon	21417259	21417688	+	Parent=Cucumis_sativus_newGene_1187.1
chr1	StringTie	gene	21593802	21594700	+	ID=Cucumis_sativus_newGene_1265
chr1	StringTie	mRNA	21593802	21594700	+	ID=Cucumis_sativus_newGene_1265.1;Parent=Cucumis_sativus_newGene_1265
chr1	StringTie	exon	21593802	21593946	+	Parent=Cucumis_sativus_newGene_1265.1
chr1	StringTie	exon	21594303	21594700	+	Parent=Cucumis_sativus_newGene_1265.1
chr1	StringTie	gene	21722509	21723049	+	ID=Cucumis_sativus_newGene_1311
chr1	StringTie	mRNA	21722509	21723049	+	ID=Cucumis_sativus_newGene_1311.1;Parent=Cucumis_sativus_newGene_1311
chr1	StringTie	exon	21722509	21722715	+	Parent=Cucumis_sativus_newGene_1311.1
chr1	StringTie	exon	21722900	21723049	+	Parent=Cucumis_sativus_newGene_1311.1
chr1	StringTie	gene	21769403	21772140	-	ID=Cucumis_sativus_newGene_1312
chr1	StringTie	mRNA	21769403	21772140	-	ID=Cucumis_sativus_newGene_1312.1;Parent=Cucumis_sativus_newGene_1312
chr1	StringTie	exon	21769403	21769549	-	Parent=Cucumis_sativus_newGene_1312.1
chr1	StringTie	gene	21771511	21773708	+	ID=Cucumis_sativus_newGene_1313
chr1	StringTie	mRNA	21771511	21773708	+	ID=Cucumis_sativus_newGene_1313.1;Parent=Cucumis_sativus_newGene_1313
chr1	StringTie	exon	21771511	21771920	+	Parent=Cucumis_sativus_newGene_1313.1
chr1	StringTie	exon	21771617	21772140	-	Parent=Cucumis_sativus_newGene_1312.1
chr1	StringTie	exon	21773459	21773708	+	Parent=Cucumis_sativus_newGene_1313.1
chr1	StringTie	gene	22234196	22234538	-	ID=Cucumis_sativus_newGene_1318
chr1	StringTie	mRNA	22234196	22234538	-	ID=Cucumis_sativus_newGene_1318.1;Parent=Cucumis_sativus_newGene_1318
chr1	StringTie	exon	22234196	22234354	-	Parent=Cucumis_sativus_newGene_1318.1
chr1	StringTie	exon	22234444	22234538	-	Parent=Cucumis_sativus_newGene_1318.1
chr1	StringTie	gene	22509812	22512049	-	ID=Cucumis_sativus_newGene_1320
chr1	StringTie	mRNA	22509812	22512049	-	ID=Cucumis_sativus_newGene_1320.1;Parent=Cucumis_sativus_newGene_1320
chr1	StringTie	exon	22509812	22510462	-	Parent=Cucumis_sativus_newGene_1320.1
chr1	StringTie	exon	22510554	22510719	-	Parent=Cucumis_sativus_newGene_1320.1
chr1	StringTie	exon	22511386	22511577	-	Parent=Cucumis_sativus_newGene_1320.1
chr1	StringTie	exon	22511723	22512049	-	Parent=Cucumis_sativus_newGene_1320.1
chr1	StringTie	gene	22638505	22639144	-	ID=Cucumis_sativus_newGene_1321
chr1	StringTie	mRNA	22638505	22639144	-	ID=Cucumis_sativus_newGene_1321.1;Parent=Cucumis_sativus_newGene_1321
chr1	StringTie	exon	22638505	22638577	-	Parent=Cucumis_sativus_newGene_1321.1
chr1	StringTie	exon	22638818	22639144	-	Parent=Cucumis_sativus_newGene_1321.1
chr1	StringTie	gene	23389717	23393171	+	ID=Cucumis_sativus_newGene_1325
chr1	StringTie	mRNA	23389717	23393171	+	ID=Cucumis_sativus_newGene_1325.1;Parent=Cucumis_sativus_newGene_1325
chr1	StringTie	exon	23389717	23389824	+	Parent=Cucumis_sativus_newGene_1325.1
chr1	StringTie	mRNA	23389725	23393171	+	ID=Cucumis_sativus_newGene_1325.2;Parent=Cucumis_sativus_newGene_1325
chr1	StringTie	exon	23389725	23389824	+	Parent=Cucumis_sativus_newGene_1325.2
chr1	StringTie	exon	23390338	23390686	+	Parent=Cucumis_sativus_newGene_1325.2
chr1	StringTie	exon	23391007	23391479	+	Parent=Cucumis_sativus_newGene_1325.1
chr1	StringTie	exon	23391007	23391479	+	Parent=Cucumis_sativus_newGene_1325.2
chr1	StringTie	exon	23392278	23393171	+	Parent=Cucumis_sativus_newGene_1325.1
chr1	StringTie	exon	23392278	23393171	+	Parent=Cucumis_sativus_newGene_1325.2
chr1	StringTie	gene	23401344	23404591	+	ID=Cucumis_sativus_newGene_1326
chr1	StringTie	mRNA	23401344	23404591	+	ID=Cucumis_sativus_newGene_1326.1;Parent=Cucumis_sativus_newGene_1326
chr1	StringTie	exon	23401344	23401991	+	Parent=Cucumis_sativus_newGene_1326.1
chr1	StringTie	exon	23402354	23402826	+	Parent=Cucumis_sativus_newGene_1326.1
chr1	StringTie	exon	23403657	23404591	+	Parent=Cucumis_sativus_newGene_1326.1
chr1	StringTie	gene	23485084	23513373	-	ID=Cucumis_sativus_newGene_1328
chr1	StringTie	mRNA	23485084	23513373	-	ID=Cucumis_sativus_newGene_1328.1;Parent=Cucumis_sativus_newGene_1328
chr1	StringTie	exon	23485084	23485600	-	Parent=Cucumis_sativus_newGene_1328.1
chr1	StringTie	mRNA	23485084	23513373	-	ID=Cucumis_sativus_newGene_1328.2;Parent=Cucumis_sativus_newGene_1328
chr1	StringTie	exon	23485084	23485600	-	Parent=Cucumis_sativus_newGene_1328.2
chr1	StringTie	mRNA	23485087	23513373	-	ID=Cucumis_sativus_newGene_1328.3;Parent=Cucumis_sativus_newGene_1328
chr1	StringTie	exon	23485087	23485600	-	Parent=Cucumis_sativus_newGene_1328.3
chr1	StringTie	mRNA	23485088	23513373	-	ID=Cucumis_sativus_newGene_1328.4;Parent=Cucumis_sativus_newGene_1328
chr1	StringTie	exon	23485088	23485600	-	Parent=Cucumis_sativus_newGene_1328.4
chr1	StringTie	mRNA	23485235	23513373	-	ID=Cucumis_sativus_newGene_1328.5;Parent=Cucumis_sativus_newGene_1328
chr1	StringTie	exon	23485235	23485600	-	Parent=Cucumis_sativus_newGene_1328.5
chr1	StringTie	exon	23487761	23487828	-	Parent=Cucumis_sativus_newGene_1328.1
chr1	StringTie	exon	23487761	23487828	-	Parent=Cucumis_sativus_newGene_1328.2
chr1	StringTie	exon	23487761	23487828	-	Parent=Cucumis_sativus_newGene_1328.3
chr1	StringTie	exon	23487761	23487828	-	Parent=Cucumis_sativus_newGene_1328.4
chr1	StringTie	exon	23487761	23487828	-	Parent=Cucumis_sativus_newGene_1328.5
chr1	StringTie	exon	23487914	23488048	-	Parent=Cucumis_sativus_newGene_1328.1
chr1	StringTie	exon	23487914	23488048	-	Parent=Cucumis_sativus_newGene_1328.2
chr1	StringTie	exon	23487914	23488048	-	Parent=Cucumis_sativus_newGene_1328.3
chr1	StringTie	exon	23487914	23488048	-	Parent=Cucumis_sativus_newGene_1328.4
chr1	StringTie	exon	23487914	23488048	-	Parent=Cucumis_sativus_newGene_1328.5
chr1	StringTie	exon	23488967	23489063	-	Parent=Cucumis_sativus_newGene_1328.1
chr1	StringTie	exon	23488967	23489063	-	Parent=Cucumis_sativus_newGene_1328.2
chr1	StringTie	exon	23488967	23489063	-	Parent=Cucumis_sativus_newGene_1328.3
chr1	StringTie	exon	23488967	23489063	-	Parent=Cucumis_sativus_newGene_1328.4
chr1	StringTie	exon	23488967	23489063	-	Parent=Cucumis_sativus_newGene_1328.5
chr1	StringTie	exon	23490495	23490626	-	Parent=Cucumis_sativus_newGene_1328.1
chr1	StringTie	exon	23490495	23490626	-	Parent=Cucumis_sativus_newGene_1328.2
chr1	StringTie	exon	23490495	23490626	-	Parent=Cucumis_sativus_newGene_1328.3
chr1	StringTie	exon	23490495	23490626	-	Parent=Cucumis_sativus_newGene_1328.4
chr1	StringTie	exon	23490495	23490626	-	Parent=Cucumis_sativus_newGene_1328.5
chr1	StringTie	exon	23491337	23491420	-	Parent=Cucumis_sativus_newGene_1328.1
chr1	StringTie	exon	23491337	23491420	-	Parent=Cucumis_sativus_newGene_1328.2
chr1	StringTie	exon	23491337	23491420	-	Parent=Cucumis_sativus_newGene_1328.3
chr1	StringTie	exon	23491337	23491420	-	Parent=Cucumis_sativus_newGene_1328.4
chr1	StringTie	exon	23491337	23491420	-	Parent=Cucumis_sativus_newGene_1328.5
chr1	StringTie	exon	23492770	23492831	-	Parent=Cucumis_sativus_newGene_1328.1
chr1	StringTie	exon	23492770	23492831	-	Parent=Cucumis_sativus_newGene_1328.2
chr1	StringTie	exon	23492770	23492831	-	Parent=Cucumis_sativus_newGene_1328.3
chr1	StringTie	exon	23492770	23492831	-	Parent=Cucumis_sativus_newGene_1328.4
chr1	StringTie	exon	23492770	23492831	-	Parent=Cucumis_sativus_newGene_1328.5
chr1	StringTie	exon	23493741	23493872	-	Parent=Cucumis_sativus_newGene_1328.1
chr1	StringTie	exon	23493741	23493872	-	Parent=Cucumis_sativus_newGene_1328.2
chr1	StringTie	exon	23493741	23493872	-	Parent=Cucumis_sativus_newGene_1328.3
chr1	StringTie	exon	23493741	23493872	-	Parent=Cucumis_sativus_newGene_1328.4
chr1	StringTie	exon	23493741	23493872	-	Parent=Cucumis_sativus_newGene_1328.5
chr1	StringTie	exon	23495582	23495764	-	Parent=Cucumis_sativus_newGene_1328.1
chr1	StringTie	exon	23495582	23495764	-	Parent=Cucumis_sativus_newGene_1328.2
chr1	StringTie	exon	23495582	23495764	-	Parent=Cucumis_sativus_newGene_1328.3
chr1	StringTie	exon	23495582	23495764	-	Parent=Cucumis_sativus_newGene_1328.4
chr1	StringTie	exon	23495582	23495764	-	Parent=Cucumis_sativus_newGene_1328.5
chr1	StringTie	exon	23496190	23496250	-	Parent=Cucumis_sativus_newGene_1328.1
chr1	StringTie	exon	23496190	23496250	-	Parent=Cucumis_sativus_newGene_1328.2
chr1	StringTie	exon	23496190	23496250	-	Parent=Cucumis_sativus_newGene_1328.3
chr1	StringTie	exon	23496190	23496250	-	Parent=Cucumis_sativus_newGene_1328.4
chr1	StringTie	exon	23496190	23496250	-	Parent=Cucumis_sativus_newGene_1328.5
chr1	StringTie	exon	23496350	23496435	-	Parent=Cucumis_sativus_newGene_1328.1
chr1	StringTie	exon	23496350	23496435	-	Parent=Cucumis_sativus_newGene_1328.2
chr1	StringTie	exon	23496350	23496435	-	Parent=Cucumis_sativus_newGene_1328.3
chr1	StringTie	exon	23496350	23496435	-	Parent=Cucumis_sativus_newGene_1328.4
chr1	StringTie	exon	23496350	23496435	-	Parent=Cucumis_sativus_newGene_1328.5
chr1	StringTie	exon	23496518	23496565	-	Parent=Cucumis_sativus_newGene_1328.1
chr1	StringTie	exon	23496518	23496565	-	Parent=Cucumis_sativus_newGene_1328.2
chr1	StringTie	exon	23496518	23496565	-	Parent=Cucumis_sativus_newGene_1328.3
chr1	StringTie	exon	23496518	23496565	-	Parent=Cucumis_sativus_newGene_1328.4
chr1	StringTie	exon	23496518	23496565	-	Parent=Cucumis_sativus_newGene_1328.5
chr1	StringTie	exon	23497570	23497686	-	Parent=Cucumis_sativus_newGene_1328.1
chr1	StringTie	exon	23497570	23497686	-	Parent=Cucumis_sativus_newGene_1328.2
chr1	StringTie	exon	23497570	23497686	-	Parent=Cucumis_sativus_newGene_1328.3
chr1	StringTie	exon	23497570	23497686	-	Parent=Cucumis_sativus_newGene_1328.4
chr1	StringTie	exon	23497570	23497686	-	Parent=Cucumis_sativus_newGene_1328.5
chr1	StringTie	exon	23497759	23497824	-	Parent=Cucumis_sativus_newGene_1328.1
chr1	StringTie	exon	23497759	23497824	-	Parent=Cucumis_sativus_newGene_1328.2
chr1	StringTie	exon	23497759	23497824	-	Parent=Cucumis_sativus_newGene_1328.3
chr1	StringTie	exon	23497759	23497824	-	Parent=Cucumis_sativus_newGene_1328.4
chr1	StringTie	exon	23497759	23497824	-	Parent=Cucumis_sativus_newGene_1328.5
chr1	StringTie	exon	23498021	23498129	-	Parent=Cucumis_sativus_newGene_1328.2
chr1	StringTie	exon	23498021	23498129	-	Parent=Cucumis_sativus_newGene_1328.3
chr1	StringTie	exon	23498021	23498129	-	Parent=Cucumis_sativus_newGene_1328.5
chr1	StringTie	exon	23498049	23498129	-	Parent=Cucumis_sativus_newGene_1328.1
chr1	StringTie	exon	23498049	23498129	-	Parent=Cucumis_sativus_newGene_1328.4
chr1	StringTie	exon	23499891	23499974	-	Parent=Cucumis_sativus_newGene_1328.1
chr1	StringTie	exon	23499891	23499974	-	Parent=Cucumis_sativus_newGene_1328.2
chr1	StringTie	exon	23499891	23499974	-	Parent=Cucumis_sativus_newGene_1328.3
chr1	StringTie	exon	23499891	23499974	-	Parent=Cucumis_sativus_newGene_1328.4
chr1	StringTie	exon	23499891	23499974	-	Parent=Cucumis_sativus_newGene_1328.5
chr1	StringTie	exon	23500484	23500594	-	Parent=Cucumis_sativus_newGene_1328.1
chr1	StringTie	exon	23500484	23500607	-	Parent=Cucumis_sativus_newGene_1328.2
chr1	StringTie	exon	23500484	23500594	-	Parent=Cucumis_sativus_newGene_1328.3
chr1	StringTie	exon	23500484	23500594	-	Parent=Cucumis_sativus_newGene_1328.5
chr1	StringTie	exon	23502808	23502865	-	Parent=Cucumis_sativus_newGene_1328.1
chr1	StringTie	exon	23502808	23502865	-	Parent=Cucumis_sativus_newGene_1328.3
chr1	StringTie	exon	23502808	23502865	-	Parent=Cucumis_sativus_newGene_1328.5
chr1	StringTie	exon	23507031	23507086	-	Parent=Cucumis_sativus_newGene_1328.1
chr1	StringTie	exon	23507031	23507086	-	Parent=Cucumis_sativus_newGene_1328.2
chr1	StringTie	exon	23507031	23507086	-	Parent=Cucumis_sativus_newGene_1328.3
chr1	StringTie	exon	23507031	23507086	-	Parent=Cucumis_sativus_newGene_1328.4
chr1	StringTie	exon	23507031	23507086	-	Parent=Cucumis_sativus_newGene_1328.5
chr1	StringTie	exon	23507257	23507317	-	Parent=Cucumis_sativus_newGene_1328.5
chr1	StringTie	exon	23512352	23512485	-	Parent=Cucumis_sativus_newGene_1328.1
chr1	StringTie	exon	23512352	23512485	-	Parent=Cucumis_sativus_newGene_1328.2
chr1	StringTie	exon	23512352	23512485	-	Parent=Cucumis_sativus_newGene_1328.3
chr1	StringTie	exon	23512352	23512485	-	Parent=Cucumis_sativus_newGene_1328.4
chr1	StringTie	exon	23512352	23512485	-	Parent=Cucumis_sativus_newGene_1328.5
chr1	StringTie	exon	23512768	23513373	-	Parent=Cucumis_sativus_newGene_1328.1
chr1	StringTie	exon	23512768	23513373	-	Parent=Cucumis_sativus_newGene_1328.2
chr1	StringTie	exon	23512768	23513373	-	Parent=Cucumis_sativus_newGene_1328.3
chr1	StringTie	exon	23512768	23513373	-	Parent=Cucumis_sativus_newGene_1328.4
chr1	StringTie	exon	23512768	23513373	-	Parent=Cucumis_sativus_newGene_1328.5
chr1	StringTie	gene	23900654	23902791	+	ID=Cucumis_sativus_newGene_1329
chr1	StringTie	mRNA	23900654	23902791	+	ID=Cucumis_sativus_newGene_1329.1;Parent=Cucumis_sativus_newGene_1329
chr1	StringTie	exon	23900654	23900963	+	Parent=Cucumis_sativus_newGene_1329.1
chr1	StringTie	exon	23901735	23902791	+	Parent=Cucumis_sativus_newGene_1329.1
chr1	StringTie	gene	24263897	24266614	-	ID=Cucumis_sativus_newGene_1331
chr1	StringTie	mRNA	24263897	24266614	-	ID=Cucumis_sativus_newGene_1331.1;Parent=Cucumis_sativus_newGene_1331
chr1	StringTie	exon	24263897	24264249	-	Parent=Cucumis_sativus_newGene_1331.1
chr1	StringTie	mRNA	24264051	24266614	-	ID=Cucumis_sativus_newGene_1331.2;Parent=Cucumis_sativus_newGene_1331
chr1	StringTie	exon	24264051	24264464	-	Parent=Cucumis_sativus_newGene_1331.2
chr1	StringTie	mRNA	24264052	24266614	-	ID=Cucumis_sativus_newGene_1331.3;Parent=Cucumis_sativus_newGene_1331
chr1	StringTie	exon	24264052	24264464	-	Parent=Cucumis_sativus_newGene_1331.3
chr1	StringTie	mRNA	24264058	24266614	-	ID=Cucumis_sativus_newGene_1331.4;Parent=Cucumis_sativus_newGene_1331
chr1	StringTie	exon	24264058	24264249	-	Parent=Cucumis_sativus_newGene_1331.4
chr1	StringTie	mRNA	24264072	24266614	-	ID=Cucumis_sativus_newGene_1331.5;Parent=Cucumis_sativus_newGene_1331
chr1	StringTie	exon	24264072	24264249	-	Parent=Cucumis_sativus_newGene_1331.5
chr1	StringTie	exon	24264366	24264464	-	Parent=Cucumis_sativus_newGene_1331.1
chr1	StringTie	exon	24264366	24264464	-	Parent=Cucumis_sativus_newGene_1331.4
chr1	StringTie	exon	24264366	24264464	-	Parent=Cucumis_sativus_newGene_1331.5
chr1	StringTie	exon	24264585	24264748	-	Parent=Cucumis_sativus_newGene_1331.1
chr1	StringTie	exon	24264585	24264748	-	Parent=Cucumis_sativus_newGene_1331.2
chr1	StringTie	exon	24264585	24264748	-	Parent=Cucumis_sativus_newGene_1331.3
chr1	StringTie	exon	24264585	24264748	-	Parent=Cucumis_sativus_newGene_1331.4
chr1	StringTie	exon	24264585	24264748	-	Parent=Cucumis_sativus_newGene_1331.5
chr1	StringTie	exon	24264879	24265357	-	Parent=Cucumis_sativus_newGene_1331.1
chr1	StringTie	exon	24264879	24265357	-	Parent=Cucumis_sativus_newGene_1331.2
chr1	StringTie	exon	24264879	24265357	-	Parent=Cucumis_sativus_newGene_1331.3
chr1	StringTie	exon	24264879	24265357	-	Parent=Cucumis_sativus_newGene_1331.4
chr1	StringTie	exon	24264879	24265357	-	Parent=Cucumis_sativus_newGene_1331.5
chr1	StringTie	exon	24265477	24265541	-	Parent=Cucumis_sativus_newGene_1331.1
chr1	StringTie	exon	24265477	24265541	-	Parent=Cucumis_sativus_newGene_1331.2
chr1	StringTie	exon	24265477	24266614	-	Parent=Cucumis_sativus_newGene_1331.3
chr1	StringTie	exon	24265477	24265541	-	Parent=Cucumis_sativus_newGene_1331.4
chr1	StringTie	exon	24265999	24266614	-	Parent=Cucumis_sativus_newGene_1331.1
chr1	StringTie	exon	24265999	24266080	-	Parent=Cucumis_sativus_newGene_1331.2
chr1	StringTie	exon	24265999	24266080	-	Parent=Cucumis_sativus_newGene_1331.4
chr1	StringTie	exon	24265999	24266614	-	Parent=Cucumis_sativus_newGene_1331.5
chr1	StringTie	exon	24266359	24266614	-	Parent=Cucumis_sativus_newGene_1331.2
chr1	StringTie	exon	24266359	24266614	-	Parent=Cucumis_sativus_newGene_1331.4
chr1	StringTie	gene	24467404	24469482	-	ID=Cucumis_sativus_newGene_1333
chr1	StringTie	mRNA	24467404	24469482	-	ID=Cucumis_sativus_newGene_1333.1;Parent=Cucumis_sativus_newGene_1333
chr1	StringTie	exon	24467404	24468595	-	Parent=Cucumis_sativus_newGene_1333.1
chr1	StringTie	mRNA	24467404	24469482	-	ID=Cucumis_sativus_newGene_1333.2;Parent=Cucumis_sativus_newGene_1333
chr1	StringTie	exon	24467404	24468595	-	Parent=Cucumis_sativus_newGene_1333.2
chr1	StringTie	mRNA	24467404	24469482	-	ID=Cucumis_sativus_newGene_1333.3;Parent=Cucumis_sativus_newGene_1333
chr1	StringTie	exon	24467404	24468595	-	Parent=Cucumis_sativus_newGene_1333.3
chr1	StringTie	mRNA	24467404	24469482	-	ID=Cucumis_sativus_newGene_1333.4;Parent=Cucumis_sativus_newGene_1333
chr1	StringTie	exon	24467404	24468595	-	Parent=Cucumis_sativus_newGene_1333.4
chr1	StringTie	mRNA	24467410	24469482	-	ID=Cucumis_sativus_newGene_1333.5;Parent=Cucumis_sativus_newGene_1333
chr1	StringTie	exon	24467410	24468595	-	Parent=Cucumis_sativus_newGene_1333.5
chr1	StringTie	mRNA	24467490	24469482	-	ID=Cucumis_sativus_newGene_1333.6;Parent=Cucumis_sativus_newGene_1333
chr1	StringTie	exon	24467490	24468595	-	Parent=Cucumis_sativus_newGene_1333.6
chr1	StringTie	mRNA	24467503	24469482	-	ID=Cucumis_sativus_newGene_1333.7;Parent=Cucumis_sativus_newGene_1333
chr1	StringTie	exon	24467503	24469278	-	Parent=Cucumis_sativus_newGene_1333.7
chr1	StringTie	exon	24469196	24469278	-	Parent=Cucumis_sativus_newGene_1333.3
chr1	StringTie	exon	24469196	24469278	-	Parent=Cucumis_sativus_newGene_1333.4
chr1	StringTie	exon	24469203	24469278	-	Parent=Cucumis_sativus_newGene_1333.1
chr1	StringTie	exon	24469203	24469278	-	Parent=Cucumis_sativus_newGene_1333.2
chr1	StringTie	exon	24469203	24469244	-	Parent=Cucumis_sativus_newGene_1333.5
chr1	StringTie	exon	24469203	24469482	-	Parent=Cucumis_sativus_newGene_1333.6
chr1	StringTie	exon	24469366	24469482	-	Parent=Cucumis_sativus_newGene_1333.1
chr1	StringTie	exon	24469366	24469482	-	Parent=Cucumis_sativus_newGene_1333.3
chr1	StringTie	exon	24469366	24469482	-	Parent=Cucumis_sativus_newGene_1333.5
chr1	StringTie	exon	24469366	24469482	-	Parent=Cucumis_sativus_newGene_1333.7
chr1	StringTie	exon	24469371	24469482	-	Parent=Cucumis_sativus_newGene_1333.2
chr1	StringTie	exon	24469371	24469482	-	Parent=Cucumis_sativus_newGene_1333.4
chr1	StringTie	gene	24867071	24869141	+	ID=Cucumis_sativus_newGene_1338
chr1	StringTie	mRNA	24867071	24869141	+	ID=Cucumis_sativus_newGene_1338.1;Parent=Cucumis_sativus_newGene_1338
chr1	StringTie	exon	24867071	24867196	+	Parent=Cucumis_sativus_newGene_1338.1
chr1	StringTie	exon	24868748	24869141	+	Parent=Cucumis_sativus_newGene_1338.1
chr1	StringTie	gene	24976099	24977125	+	ID=Cucumis_sativus_newGene_1340
chr1	StringTie	mRNA	24976099	24977125	+	ID=Cucumis_sativus_newGene_1340.1;Parent=Cucumis_sativus_newGene_1340
chr1	StringTie	exon	24976099	24976274	+	Parent=Cucumis_sativus_newGene_1340.1
chr1	StringTie	exon	24976898	24977125	+	Parent=Cucumis_sativus_newGene_1340.1
chr1	StringTie	gene	24986760	24989220	-	ID=Cucumis_sativus_newGene_1341
chr1	StringTie	mRNA	24986760	24989220	-	ID=Cucumis_sativus_newGene_1341.1;Parent=Cucumis_sativus_newGene_1341
chr1	StringTie	exon	24986760	24987489	-	Parent=Cucumis_sativus_newGene_1341.1
chr1	StringTie	exon	24989036	24989220	-	Parent=Cucumis_sativus_newGene_1341.1
chr1	StringTie	gene	25078040	25083766	+	ID=Cucumis_sativus_newGene_1343
chr1	StringTie	mRNA	25078040	25083766	+	ID=Cucumis_sativus_newGene_1343.1;Parent=Cucumis_sativus_newGene_1343
chr1	StringTie	exon	25078040	25078346	+	Parent=Cucumis_sativus_newGene_1343.1
chr1	StringTie	mRNA	25078125	25083766	+	ID=Cucumis_sativus_newGene_1343.2;Parent=Cucumis_sativus_newGene_1343
chr1	StringTie	exon	25078125	25078346	+	Parent=Cucumis_sativus_newGene_1343.2
chr1	StringTie	mRNA	25078125	25083766	+	ID=Cucumis_sativus_newGene_1343.3;Parent=Cucumis_sativus_newGene_1343
chr1	StringTie	exon	25078125	25078346	+	Parent=Cucumis_sativus_newGene_1343.3
chr1	StringTie	mRNA	25079978	25083766	+	ID=Cucumis_sativus_newGene_1343.4;Parent=Cucumis_sativus_newGene_1343
chr1	StringTie	exon	25079978	25080116	+	Parent=Cucumis_sativus_newGene_1343.4
chr1	StringTie	exon	25080054	25080116	+	Parent=Cucumis_sativus_newGene_1343.1
chr1	StringTie	exon	25080054	25080116	+	Parent=Cucumis_sativus_newGene_1343.2
chr1	StringTie	exon	25080257	25080366	+	Parent=Cucumis_sativus_newGene_1343.1
chr1	StringTie	exon	25080257	25080366	+	Parent=Cucumis_sativus_newGene_1343.2
chr1	StringTie	exon	25080257	25080366	+	Parent=Cucumis_sativus_newGene_1343.3
chr1	StringTie	exon	25080257	25080366	+	Parent=Cucumis_sativus_newGene_1343.4
chr1	StringTie	exon	25080614	25080671	+	Parent=Cucumis_sativus_newGene_1343.1
chr1	StringTie	exon	25080614	25080671	+	Parent=Cucumis_sativus_newGene_1343.2
chr1	StringTie	exon	25080614	25080671	+	Parent=Cucumis_sativus_newGene_1343.3
chr1	StringTie	exon	25080614	25080671	+	Parent=Cucumis_sativus_newGene_1343.4
chr1	StringTie	exon	25080859	25081122	+	Parent=Cucumis_sativus_newGene_1343.1
chr1	StringTie	exon	25080859	25081122	+	Parent=Cucumis_sativus_newGene_1343.2
chr1	StringTie	exon	25080859	25081122	+	Parent=Cucumis_sativus_newGene_1343.3
chr1	StringTie	exon	25081203	25081340	+	Parent=Cucumis_sativus_newGene_1343.1
chr1	StringTie	exon	25081203	25081860	+	Parent=Cucumis_sativus_newGene_1343.2
chr1	StringTie	exon	25081203	25081340	+	Parent=Cucumis_sativus_newGene_1343.3
chr1	StringTie	exon	25081809	25081860	+	Parent=Cucumis_sativus_newGene_1343.1
chr1	StringTie	exon	25081809	25081860	+	Parent=Cucumis_sativus_newGene_1343.3
chr1	StringTie	exon	25081809	25081860	+	Parent=Cucumis_sativus_newGene_1343.4
chr1	StringTie	exon	25082120	25082199	+	Parent=Cucumis_sativus_newGene_1343.1
chr1	StringTie	exon	25082120	25082199	+	Parent=Cucumis_sativus_newGene_1343.2
chr1	StringTie	exon	25082120	25082199	+	Parent=Cucumis_sativus_newGene_1343.3
chr1	StringTie	exon	25082120	25082199	+	Parent=Cucumis_sativus_newGene_1343.4
chr1	StringTie	exon	25082814	25082873	+	Parent=Cucumis_sativus_newGene_1343.1
chr1	StringTie	exon	25082814	25082873	+	Parent=Cucumis_sativus_newGene_1343.2
chr1	StringTie	exon	25082814	25082873	+	Parent=Cucumis_sativus_newGene_1343.3
chr1	StringTie	exon	25082814	25082873	+	Parent=Cucumis_sativus_newGene_1343.4
chr1	StringTie	exon	25082985	25083065	+	Parent=Cucumis_sativus_newGene_1343.1
chr1	StringTie	exon	25082985	25083065	+	Parent=Cucumis_sativus_newGene_1343.2
chr1	StringTie	exon	25082985	25083065	+	Parent=Cucumis_sativus_newGene_1343.3
chr1	StringTie	exon	25082985	25083065	+	Parent=Cucumis_sativus_newGene_1343.4
chr1	StringTie	exon	25083453	25083766	+	Parent=Cucumis_sativus_newGene_1343.1
chr1	StringTie	exon	25083453	25083766	+	Parent=Cucumis_sativus_newGene_1343.2
chr1	StringTie	exon	25083453	25083766	+	Parent=Cucumis_sativus_newGene_1343.3
chr1	StringTie	exon	25083453	25083766	+	Parent=Cucumis_sativus_newGene_1343.4
chr1	StringTie	gene	25086249	25090915	+	ID=Cucumis_sativus_newGene_1344
chr1	StringTie	mRNA	25086249	25090038	+	ID=Cucumis_sativus_newGene_1344.1;Parent=Cucumis_sativus_newGene_1344
chr1	StringTie	exon	25086249	25086502	+	Parent=Cucumis_sativus_newGene_1344.1
chr1	StringTie	mRNA	25086340	25090915	+	ID=Cucumis_sativus_newGene_1344.2;Parent=Cucumis_sativus_newGene_1344
chr1	StringTie	exon	25086340	25086502	+	Parent=Cucumis_sativus_newGene_1344.2
chr1	StringTie	exon	25086620	25086729	+	Parent=Cucumis_sativus_newGene_1344.1
chr1	StringTie	exon	25086620	25086729	+	Parent=Cucumis_sativus_newGene_1344.2
chr1	StringTie	exon	25087383	25087440	+	Parent=Cucumis_sativus_newGene_1344.1
chr1	StringTie	exon	25087388	25087440	+	Parent=Cucumis_sativus_newGene_1344.2
chr1	StringTie	exon	25088214	25088477	+	Parent=Cucumis_sativus_newGene_1344.1
chr1	StringTie	exon	25088214	25088477	+	Parent=Cucumis_sativus_newGene_1344.2
chr1	StringTie	exon	25088745	25088882	+	Parent=Cucumis_sativus_newGene_1344.1
chr1	StringTie	exon	25088745	25088882	+	Parent=Cucumis_sativus_newGene_1344.2
chr1	StringTie	exon	25088990	25089041	+	Parent=Cucumis_sativus_newGene_1344.1
chr1	StringTie	exon	25088990	25089041	+	Parent=Cucumis_sativus_newGene_1344.2
chr1	StringTie	exon	25089959	25090038	+	Parent=Cucumis_sativus_newGene_1344.1
chr1	StringTie	exon	25089959	25090038	+	Parent=Cucumis_sativus_newGene_1344.2
chr1	StringTie	exon	25090617	25090676	+	Parent=Cucumis_sativus_newGene_1344.2
chr1	StringTie	exon	25090860	25090915	+	Parent=Cucumis_sativus_newGene_1344.2
chr1	StringTie	gene	25139367	25140434	-	ID=Cucumis_sativus_newGene_1347
chr1	StringTie	mRNA	25139367	25140434	-	ID=Cucumis_sativus_newGene_1347.1;Parent=Cucumis_sativus_newGene_1347
chr1	StringTie	exon	25139367	25139761	-	Parent=Cucumis_sativus_newGene_1347.1
chr1	StringTie	exon	25140344	25140434	-	Parent=Cucumis_sativus_newGene_1347.1
chr1	StringTie	gene	25217352	25222006	+	ID=Cucumis_sativus_newGene_1348
chr1	StringTie	mRNA	25217352	25222006	+	ID=Cucumis_sativus_newGene_1348.1;Parent=Cucumis_sativus_newGene_1348
chr1	StringTie	exon	25217352	25217480	+	Parent=Cucumis_sativus_newGene_1348.1
chr1	StringTie	exon	25221191	25222006	+	Parent=Cucumis_sativus_newGene_1348.1
chr1	StringTie	gene	25441208	25461665	+	ID=Cucumis_sativus_newGene_1351
chr1	StringTie	mRNA	25441208	25461665	+	ID=Cucumis_sativus_newGene_1351.1;Parent=Cucumis_sativus_newGene_1351
chr1	StringTie	exon	25441208	25441553	+	Parent=Cucumis_sativus_newGene_1351.1
chr1	StringTie	exon	25449815	25451901	+	Parent=Cucumis_sativus_newGene_1351.1
chr1	StringTie	mRNA	25451355	25453297	+	ID=Cucumis_sativus_newGene_1351.2;Parent=Cucumis_sativus_newGene_1351
chr1	StringTie	exon	25451355	25451370	+	Parent=Cucumis_sativus_newGene_1351.2
chr1	StringTie	exon	25451778	25453297	+	Parent=Cucumis_sativus_newGene_1351.2
chr1	StringTie	mRNA	25459642	25461665	+	ID=Cucumis_sativus_newGene_1351.3;Parent=Cucumis_sativus_newGene_1351
chr1	StringTie	exon	25459642	25459657	+	Parent=Cucumis_sativus_newGene_1351.3
chr1	StringTie	exon	25459782	25461665	+	Parent=Cucumis_sativus_newGene_1351.1
chr1	StringTie	exon	25460064	25461665	+	Parent=Cucumis_sativus_newGene_1351.3
chr1	StringTie	gene	25464584	25467569	+	ID=Cucumis_sativus_newGene_1352
chr1	StringTie	mRNA	25464584	25466293	+	ID=Cucumis_sativus_newGene_1352.1;Parent=Cucumis_sativus_newGene_1352
chr1	StringTie	exon	25464584	25465358	+	Parent=Cucumis_sativus_newGene_1352.1
chr1	StringTie	exon	25465381	25466293	+	Parent=Cucumis_sativus_newGene_1352.1
chr1	StringTie	gene	26445535	26448754	+	ID=Cucumis_sativus_newGene_1354
chr1	StringTie	mRNA	26445535	26448754	+	ID=Cucumis_sativus_newGene_1354.1;Parent=Cucumis_sativus_newGene_1354
chr1	StringTie	exon	26445535	26445842	+	Parent=Cucumis_sativus_newGene_1354.1
chr1	StringTie	exon	26448474	26448754	+	Parent=Cucumis_sativus_newGene_1354.1
chr1	StringTie	gene	26662728	26665153	-	ID=Cucumis_sativus_newGene_1355
chr1	StringTie	mRNA	26662728	26665153	-	ID=Cucumis_sativus_newGene_1355.1;Parent=Cucumis_sativus_newGene_1355
chr1	StringTie	exon	26662728	26662833	-	Parent=Cucumis_sativus_newGene_1355.1
chr1	StringTie	exon	26663764	26665153	-	Parent=Cucumis_sativus_newGene_1355.1
chr1	StringTie	gene	26953827	26954778	-	ID=Cucumis_sativus_newGene_1356
chr1	StringTie	mRNA	26953827	26954778	-	ID=Cucumis_sativus_newGene_1356.1;Parent=Cucumis_sativus_newGene_1356
chr1	StringTie	exon	26953827	26954004	-	Parent=Cucumis_sativus_newGene_1356.1
chr1	StringTie	mRNA	26953827	26954778	-	ID=Cucumis_sativus_newGene_1356.2;Parent=Cucumis_sativus_newGene_1356
chr1	StringTie	exon	26953827	26954029	-	Parent=Cucumis_sativus_newGene_1356.2
chr1	StringTie	exon	26954432	26954504	-	Parent=Cucumis_sativus_newGene_1356.1
chr1	StringTie	exon	26954432	26954504	-	Parent=Cucumis_sativus_newGene_1356.2
chr1	StringTie	exon	26954597	26954778	-	Parent=Cucumis_sativus_newGene_1356.1
chr1	StringTie	exon	26954597	26954778	-	Parent=Cucumis_sativus_newGene_1356.2
chr1	StringTie	gene	28135295	28137480	-	ID=Cucumis_sativus_newGene_1360
chr1	StringTie	mRNA	28135295	28137480	-	ID=Cucumis_sativus_newGene_1360.1;Parent=Cucumis_sativus_newGene_1360
chr1	StringTie	exon	28135295	28136029	-	Parent=Cucumis_sativus_newGene_1360.1
chr1	StringTie	exon	28136439	28137480	-	Parent=Cucumis_sativus_newGene_1360.1
chr1	StringTie	gene	28347306	28348558	-	ID=Cucumis_sativus_newGene_1362
chr1	StringTie	mRNA	28347306	28348558	-	ID=Cucumis_sativus_newGene_1362.1;Parent=Cucumis_sativus_newGene_1362
chr1	StringTie	exon	28347306	28347474	-	Parent=Cucumis_sativus_newGene_1362.1
chr1	StringTie	mRNA	28347418	28348558	-	ID=Cucumis_sativus_newGene_1362.2;Parent=Cucumis_sativus_newGene_1362
chr1	StringTie	exon	28347418	28347474	-	Parent=Cucumis_sativus_newGene_1362.2
chr1	StringTie	exon	28347763	28348558	-	Parent=Cucumis_sativus_newGene_1362.1
chr1	StringTie	exon	28347763	28347815	-	Parent=Cucumis_sativus_newGene_1362.2
chr1	StringTie	exon	28347897	28348558	-	Parent=Cucumis_sativus_newGene_1362.2
chr1	StringTie	gene	29113375	29116342	-	ID=Cucumis_sativus_newGene_1364
chr1	StringTie	mRNA	29113375	29116342	-	ID=Cucumis_sativus_newGene_1364.1;Parent=Cucumis_sativus_newGene_1364
chr1	StringTie	exon	29113375	29113822	-	Parent=Cucumis_sativus_newGene_1364.1
chr1	StringTie	exon	29113915	29114012	-	Parent=Cucumis_sativus_newGene_1364.1
chr1	StringTie	exon	29114407	29116342	-	Parent=Cucumis_sativus_newGene_1364.1
chr1	StringTie	gene	29343089	29346026	-	ID=Cucumis_sativus_newGene_1365
chr1	StringTie	mRNA	29343089	29346026	-	ID=Cucumis_sativus_newGene_1365.1;Parent=Cucumis_sativus_newGene_1365
chr1	StringTie	exon	29343089	29343634	-	Parent=Cucumis_sativus_newGene_1365.1
chr1	StringTie	mRNA	29343089	29346026	-	ID=Cucumis_sativus_newGene_1365.10;Parent=Cucumis_sativus_newGene_1365
chr1	StringTie	exon	29343089	29343634	-	Parent=Cucumis_sativus_newGene_1365.10
chr1	StringTie	mRNA	29343089	29346026	-	ID=Cucumis_sativus_newGene_1365.5;Parent=Cucumis_sativus_newGene_1365
chr1	StringTie	exon	29343089	29343634	-	Parent=Cucumis_sativus_newGene_1365.5
chr1	StringTie	mRNA	29343089	29346026	-	ID=Cucumis_sativus_newGene_1365.6;Parent=Cucumis_sativus_newGene_1365
chr1	StringTie	exon	29343089	29343634	-	Parent=Cucumis_sativus_newGene_1365.6
chr1	StringTie	mRNA	29343089	29346026	-	ID=Cucumis_sativus_newGene_1365.9;Parent=Cucumis_sativus_newGene_1365
chr1	StringTie	exon	29343089	29343634	-	Parent=Cucumis_sativus_newGene_1365.9
chr1	StringTie	mRNA	29343099	29346026	-	ID=Cucumis_sativus_newGene_1365.12;Parent=Cucumis_sativus_newGene_1365
chr1	StringTie	exon	29343099	29343634	-	Parent=Cucumis_sativus_newGene_1365.12
chr1	StringTie	mRNA	29343128	29346026	-	ID=Cucumis_sativus_newGene_1365.2;Parent=Cucumis_sativus_newGene_1365
chr1	StringTie	exon	29343128	29344848	-	Parent=Cucumis_sativus_newGene_1365.2
chr1	StringTie	mRNA	29343148	29346026	-	ID=Cucumis_sativus_newGene_1365.3;Parent=Cucumis_sativus_newGene_1365
chr1	StringTie	exon	29343148	29343634	-	Parent=Cucumis_sativus_newGene_1365.3
chr1	StringTie	exon	29344766	29344848	-	Parent=Cucumis_sativus_newGene_1365.1
chr1	StringTie	exon	29344766	29344848	-	Parent=Cucumis_sativus_newGene_1365.3
chr1	StringTie	exon	29344766	29344848	-	Parent=Cucumis_sativus_newGene_1365.5
chr1	StringTie	exon	29344766	29344848	-	Parent=Cucumis_sativus_newGene_1365.6
chr1	StringTie	exon	29345536	29346026	-	Parent=Cucumis_sativus_newGene_1365.1
chr1	StringTie	exon	29345536	29345603	-	Parent=Cucumis_sativus_newGene_1365.10
chr1	StringTie	exon	29345536	29346026	-	Parent=Cucumis_sativus_newGene_1365.12
chr1	StringTie	exon	29345536	29345766	-	Parent=Cucumis_sativus_newGene_1365.2
chr1	StringTie	exon	29345536	29345603	-	Parent=Cucumis_sativus_newGene_1365.3
chr1	StringTie	exon	29345536	29345766	-	Parent=Cucumis_sativus_newGene_1365.5
chr1	StringTie	exon	29345536	29345603	-	Parent=Cucumis_sativus_newGene_1365.6
chr1	StringTie	exon	29345536	29345766	-	Parent=Cucumis_sativus_newGene_1365.9
chr1	StringTie	exon	29345695	29345766	-	Parent=Cucumis_sativus_newGene_1365.3
chr1	StringTie	exon	29345695	29346026	-	Parent=Cucumis_sativus_newGene_1365.6
chr1	StringTie	exon	29345927	29346026	-	Parent=Cucumis_sativus_newGene_1365.10
chr1	StringTie	exon	29345927	29346026	-	Parent=Cucumis_sativus_newGene_1365.2
chr1	StringTie	exon	29345927	29346026	-	Parent=Cucumis_sativus_newGene_1365.3
chr1	StringTie	exon	29345927	29346026	-	Parent=Cucumis_sativus_newGene_1365.5
chr1	StringTie	exon	29345927	29346026	-	Parent=Cucumis_sativus_newGene_1365.9
chr1	StringTie	gene	29829263	29836969	-	ID=Cucumis_sativus_newGene_1366
chr1	StringTie	mRNA	29829263	29836969	-	ID=Cucumis_sativus_newGene_1366.1;Parent=Cucumis_sativus_newGene_1366
chr1	StringTie	exon	29829263	29829562	-	Parent=Cucumis_sativus_newGene_1366.1
chr1	StringTie	mRNA	29829374	29836969	-	ID=Cucumis_sativus_newGene_1366.2;Parent=Cucumis_sativus_newGene_1366
chr1	StringTie	exon	29829374	29829562	-	Parent=Cucumis_sativus_newGene_1366.2
chr1	StringTie	exon	29832148	29832273	-	Parent=Cucumis_sativus_newGene_1366.1
chr1	StringTie	exon	29832148	29832273	-	Parent=Cucumis_sativus_newGene_1366.2
chr1	StringTie	exon	29832439	29832684	-	Parent=Cucumis_sativus_newGene_1366.1
chr1	StringTie	exon	29832439	29832684	-	Parent=Cucumis_sativus_newGene_1366.2
chr1	StringTie	exon	29832793	29832912	-	Parent=Cucumis_sativus_newGene_1366.1
chr1	StringTie	exon	29832793	29832912	-	Parent=Cucumis_sativus_newGene_1366.2
chr1	StringTie	exon	29833617	29833930	-	Parent=Cucumis_sativus_newGene_1366.1
chr1	StringTie	exon	29833617	29833930	-	Parent=Cucumis_sativus_newGene_1366.2
chr1	StringTie	exon	29834041	29834166	-	Parent=Cucumis_sativus_newGene_1366.1
chr1	StringTie	exon	29834041	29834166	-	Parent=Cucumis_sativus_newGene_1366.2
chr1	StringTie	mRNA	29834061	29835096	-	ID=Cucumis_sativus_newGene_1366.3;Parent=Cucumis_sativus_newGene_1366
chr1	StringTie	exon	29834061	29834166	-	Parent=Cucumis_sativus_newGene_1366.3
chr1	StringTie	mRNA	29834124	29836969	-	ID=Cucumis_sativus_newGene_1366.4;Parent=Cucumis_sativus_newGene_1366
chr1	StringTie	exon	29834124	29834605	-	Parent=Cucumis_sativus_newGene_1366.4
chr1	StringTie	exon	29834506	29834605	-	Parent=Cucumis_sativus_newGene_1366.1
chr1	StringTie	exon	29834506	29834624	-	Parent=Cucumis_sativus_newGene_1366.2
chr1	StringTie	exon	29834727	29834861	-	Parent=Cucumis_sativus_newGene_1366.1
chr1	StringTie	exon	29834727	29834861	-	Parent=Cucumis_sativus_newGene_1366.2
chr1	StringTie	exon	29834727	29835096	-	Parent=Cucumis_sativus_newGene_1366.3
chr1	StringTie	exon	29834727	29834861	-	Parent=Cucumis_sativus_newGene_1366.4
chr1	StringTie	exon	29836472	29836969	-	Parent=Cucumis_sativus_newGene_1366.1
chr1	StringTie	exon	29836472	29836969	-	Parent=Cucumis_sativus_newGene_1366.2
chr1	StringTie	exon	29836472	29836969	-	Parent=Cucumis_sativus_newGene_1366.4
chr1	StringTie	gene	30112386	30113331	+	ID=Cucumis_sativus_newGene_1367
chr1	StringTie	mRNA	30112386	30113331	+	ID=Cucumis_sativus_newGene_1367.1;Parent=Cucumis_sativus_newGene_1367
chr1	StringTie	exon	30112386	30112673	+	Parent=Cucumis_sativus_newGene_1367.1
chr1	StringTie	exon	30112951	30113331	+	Parent=Cucumis_sativus_newGene_1367.1
chr1	StringTie	gene	30618032	30619106	+	ID=Cucumis_sativus_newGene_1369
chr1	StringTie	mRNA	30618032	30619106	+	ID=Cucumis_sativus_newGene_1369.1;Parent=Cucumis_sativus_newGene_1369
chr1	StringTie	exon	30618032	30618669	+	Parent=Cucumis_sativus_newGene_1369.1
chr1	StringTie	exon	30618804	30619106	+	Parent=Cucumis_sativus_newGene_1369.1
chr1	StringTie	gene	30945227	30945780	-	ID=Cucumis_sativus_newGene_1372
chr1	StringTie	mRNA	30945227	30945780	-	ID=Cucumis_sativus_newGene_1372.1;Parent=Cucumis_sativus_newGene_1372
chr1	StringTie	exon	30945227	30945513	-	Parent=Cucumis_sativus_newGene_1372.1
chr1	StringTie	exon	30945757	30945780	-	Parent=Cucumis_sativus_newGene_1372.1
chr1	StringTie	gene	31042778	31043268	+	ID=Cucumis_sativus_newGene_1373
chr1	StringTie	mRNA	31042778	31043268	+	ID=Cucumis_sativus_newGene_1373.1;Parent=Cucumis_sativus_newGene_1373
chr1	StringTie	exon	31042778	31043080	+	Parent=Cucumis_sativus_newGene_1373.1
chr1	StringTie	exon	31043224	31043268	+	Parent=Cucumis_sativus_newGene_1373.1
chr1	StringTie	gene	31052175	31055646	-	ID=Cucumis_sativus_newGene_1374
chr1	StringTie	mRNA	31052175	31055646	-	ID=Cucumis_sativus_newGene_1374.1;Parent=Cucumis_sativus_newGene_1374
chr1	StringTie	exon	31052175	31052471	-	Parent=Cucumis_sativus_newGene_1374.1
chr1	StringTie	exon	31055404	31055646	-	Parent=Cucumis_sativus_newGene_1374.1
chr1	StringTie	gene	31056600	31067861	-	ID=Cucumis_sativus_newGene_1375
chr1	StringTie	mRNA	31056600	31067861	-	ID=Cucumis_sativus_newGene_1375.1;Parent=Cucumis_sativus_newGene_1375
chr1	StringTie	exon	31056600	31056839	-	Parent=Cucumis_sativus_newGene_1375.1
chr1	StringTie	mRNA	31056618	31063365	-	ID=Cucumis_sativus_newGene_1375.3;Parent=Cucumis_sativus_newGene_1375
chr1	StringTie	exon	31056618	31056839	-	Parent=Cucumis_sativus_newGene_1375.3
chr1	StringTie	mRNA	31056634	31064310	-	ID=Cucumis_sativus_newGene_1375.4;Parent=Cucumis_sativus_newGene_1375
chr1	StringTie	exon	31056634	31056839	-	Parent=Cucumis_sativus_newGene_1375.4
chr1	StringTie	mRNA	31056654	31067861	-	ID=Cucumis_sativus_newGene_1375.5;Parent=Cucumis_sativus_newGene_1375
chr1	StringTie	exon	31056654	31056839	-	Parent=Cucumis_sativus_newGene_1375.5
chr1	StringTie	mRNA	31056654	31063365	-	ID=Cucumis_sativus_newGene_1375.6;Parent=Cucumis_sativus_newGene_1375
chr1	StringTie	exon	31056654	31062103	-	Parent=Cucumis_sativus_newGene_1375.6
chr1	StringTie	mRNA	31056661	31067861	-	ID=Cucumis_sativus_newGene_1375.7;Parent=Cucumis_sativus_newGene_1375
chr1	StringTie	exon	31056661	31056839	-	Parent=Cucumis_sativus_newGene_1375.7
chr1	StringTie	mRNA	31056664	31067861	-	ID=Cucumis_sativus_newGene_1375.8;Parent=Cucumis_sativus_newGene_1375
chr1	StringTie	exon	31056664	31057019	-	Parent=Cucumis_sativus_newGene_1375.8
chr1	StringTie	exon	31056953	31057019	-	Parent=Cucumis_sativus_newGene_1375.1
chr1	StringTie	exon	31056953	31057019	-	Parent=Cucumis_sativus_newGene_1375.3
chr1	StringTie	exon	31056953	31057019	-	Parent=Cucumis_sativus_newGene_1375.4
chr1	StringTie	exon	31056953	31057019	-	Parent=Cucumis_sativus_newGene_1375.5
chr1	StringTie	exon	31056953	31057019	-	Parent=Cucumis_sativus_newGene_1375.7
chr1	StringTie	exon	31062003	31062103	-	Parent=Cucumis_sativus_newGene_1375.1
chr1	StringTie	exon	31062003	31062103	-	Parent=Cucumis_sativus_newGene_1375.3
chr1	StringTie	exon	31062003	31062103	-	Parent=Cucumis_sativus_newGene_1375.4
chr1	StringTie	exon	31062003	31062103	-	Parent=Cucumis_sativus_newGene_1375.5
chr1	StringTie	exon	31062003	31062103	-	Parent=Cucumis_sativus_newGene_1375.7
chr1	StringTie	exon	31062003	31062103	-	Parent=Cucumis_sativus_newGene_1375.8
chr1	StringTie	exon	31062297	31062355	-	Parent=Cucumis_sativus_newGene_1375.1
chr1	StringTie	exon	31062297	31062355	-	Parent=Cucumis_sativus_newGene_1375.3
chr1	StringTie	exon	31062297	31062355	-	Parent=Cucumis_sativus_newGene_1375.4
chr1	StringTie	exon	31062297	31062355	-	Parent=Cucumis_sativus_newGene_1375.5
chr1	StringTie	exon	31062297	31062355	-	Parent=Cucumis_sativus_newGene_1375.6
chr1	StringTie	exon	31062297	31062355	-	Parent=Cucumis_sativus_newGene_1375.7
chr1	StringTie	exon	31062297	31062355	-	Parent=Cucumis_sativus_newGene_1375.8
chr1	StringTie	exon	31062471	31062603	-	Parent=Cucumis_sativus_newGene_1375.1
chr1	StringTie	exon	31062471	31063365	-	Parent=Cucumis_sativus_newGene_1375.3
chr1	StringTie	exon	31062471	31062603	-	Parent=Cucumis_sativus_newGene_1375.4
chr1	StringTie	exon	31062471	31062603	-	Parent=Cucumis_sativus_newGene_1375.5
chr1	StringTie	exon	31062471	31063365	-	Parent=Cucumis_sativus_newGene_1375.6
chr1	StringTie	exon	31062471	31062603	-	Parent=Cucumis_sativus_newGene_1375.7
chr1	StringTie	exon	31062471	31062603	-	Parent=Cucumis_sativus_newGene_1375.8
chr1	StringTie	exon	31063294	31063365	-	Parent=Cucumis_sativus_newGene_1375.1
chr1	StringTie	exon	31063294	31063365	-	Parent=Cucumis_sativus_newGene_1375.4
chr1	StringTie	exon	31063294	31063365	-	Parent=Cucumis_sativus_newGene_1375.5
chr1	StringTie	exon	31063294	31063365	-	Parent=Cucumis_sativus_newGene_1375.7
chr1	StringTie	exon	31063294	31063365	-	Parent=Cucumis_sativus_newGene_1375.8
chr1	StringTie	exon	31064178	31064310	-	Parent=Cucumis_sativus_newGene_1375.4
chr1	StringTie	mRNA	31064311	31067861	-	ID=Cucumis_sativus_newGene_1375.10;Parent=Cucumis_sativus_newGene_1375
chr1	StringTie	exon	31064311	31064531	-	Parent=Cucumis_sativus_newGene_1375.10
chr1	StringTie	mRNA	31064311	31067861	-	ID=Cucumis_sativus_newGene_1375.2;Parent=Cucumis_sativus_newGene_1375
chr1	StringTie	exon	31064311	31064531	-	Parent=Cucumis_sativus_newGene_1375.2
chr1	StringTie	mRNA	31064311	31067861	-	ID=Cucumis_sativus_newGene_1375.9;Parent=Cucumis_sativus_newGene_1375
chr1	StringTie	exon	31064311	31065634	-	Parent=Cucumis_sativus_newGene_1375.9
chr1	StringTie	exon	31064423	31064534	-	Parent=Cucumis_sativus_newGene_1375.1
chr1	StringTie	exon	31064423	31064534	-	Parent=Cucumis_sativus_newGene_1375.5
chr1	StringTie	exon	31065156	31065634	-	Parent=Cucumis_sativus_newGene_1375.1
chr1	StringTie	exon	31065156	31065634	-	Parent=Cucumis_sativus_newGene_1375.10
chr1	StringTie	exon	31065156	31065634	-	Parent=Cucumis_sativus_newGene_1375.2
chr1	StringTie	exon	31065156	31065634	-	Parent=Cucumis_sativus_newGene_1375.5
chr1	StringTie	exon	31065156	31065634	-	Parent=Cucumis_sativus_newGene_1375.8
chr1	StringTie	exon	31067477	31067607	-	Parent=Cucumis_sativus_newGene_1375.1
chr1	StringTie	exon	31067477	31067610	-	Parent=Cucumis_sativus_newGene_1375.10
chr1	StringTie	exon	31067477	31067607	-	Parent=Cucumis_sativus_newGene_1375.2
chr1	StringTie	exon	31067477	31067610	-	Parent=Cucumis_sativus_newGene_1375.5
chr1	StringTie	exon	31067477	31067610	-	Parent=Cucumis_sativus_newGene_1375.7
chr1	StringTie	exon	31067477	31067607	-	Parent=Cucumis_sativus_newGene_1375.8
chr1	StringTie	exon	31067477	31067610	-	Parent=Cucumis_sativus_newGene_1375.9
chr1	StringTie	exon	31067813	31067861	-	Parent=Cucumis_sativus_newGene_1375.1
chr1	StringTie	exon	31067813	31067861	-	Parent=Cucumis_sativus_newGene_1375.10
chr1	StringTie	exon	31067813	31067861	-	Parent=Cucumis_sativus_newGene_1375.2
chr1	StringTie	exon	31067813	31067861	-	Parent=Cucumis_sativus_newGene_1375.5
chr1	StringTie	exon	31067813	31067861	-	Parent=Cucumis_sativus_newGene_1375.7
chr1	StringTie	exon	31067813	31067861	-	Parent=Cucumis_sativus_newGene_1375.8
chr1	StringTie	exon	31067813	31067861	-	Parent=Cucumis_sativus_newGene_1375.9
chr1	StringTie	gene	31152961	31153338	-	ID=Cucumis_sativus_newGene_1376
chr1	StringTie	mRNA	31152961	31153338	-	ID=Cucumis_sativus_newGene_1376.1;Parent=Cucumis_sativus_newGene_1376
chr1	StringTie	exon	31152961	31153022	-	Parent=Cucumis_sativus_newGene_1376.1
chr1	StringTie	exon	31153149	31153338	-	Parent=Cucumis_sativus_newGene_1376.1
chr1	StringTie	gene	31231406	31235007	-	ID=Cucumis_sativus_newGene_1378
chr1	StringTie	mRNA	31231406	31235007	-	ID=Cucumis_sativus_newGene_1378.1;Parent=Cucumis_sativus_newGene_1378
chr1	StringTie	exon	31231406	31231679	-	Parent=Cucumis_sativus_newGene_1378.1
chr1	StringTie	exon	31234656	31235007	-	Parent=Cucumis_sativus_newGene_1378.1
chr1	StringTie	gene	31611536	31613455	+	ID=Cucumis_sativus_newGene_1380
chr1	StringTie	mRNA	31611536	31613455	+	ID=Cucumis_sativus_newGene_1380.1;Parent=Cucumis_sativus_newGene_1380
chr1	StringTie	exon	31611536	31612605	+	Parent=Cucumis_sativus_newGene_1380.1
chr1	StringTie	mRNA	31611583	31613455	+	ID=Cucumis_sativus_newGene_1380.2;Parent=Cucumis_sativus_newGene_1380
chr1	StringTie	exon	31611583	31612837	+	Parent=Cucumis_sativus_newGene_1380.2
chr1	StringTie	mRNA	31611586	31613455	+	ID=Cucumis_sativus_newGene_1380.3;Parent=Cucumis_sativus_newGene_1380
chr1	StringTie	exon	31611586	31612605	+	Parent=Cucumis_sativus_newGene_1380.3
chr1	StringTie	mRNA	31611586	31613455	+	ID=Cucumis_sativus_newGene_1380.4;Parent=Cucumis_sativus_newGene_1380
chr1	StringTie	exon	31611586	31612605	+	Parent=Cucumis_sativus_newGene_1380.4
chr1	StringTie	mRNA	31611587	31613455	+	ID=Cucumis_sativus_newGene_1380.5;Parent=Cucumis_sativus_newGene_1380
chr1	StringTie	exon	31611587	31612605	+	Parent=Cucumis_sativus_newGene_1380.5
chr1	StringTie	mRNA	31611588	31613455	+	ID=Cucumis_sativus_newGene_1380.6;Parent=Cucumis_sativus_newGene_1380
chr1	StringTie	exon	31611588	31612605	+	Parent=Cucumis_sativus_newGene_1380.6
chr1	StringTie	mRNA	31611588	31613455	+	ID=Cucumis_sativus_newGene_1380.7;Parent=Cucumis_sativus_newGene_1380
chr1	StringTie	exon	31611588	31612605	+	Parent=Cucumis_sativus_newGene_1380.7
chr1	StringTie	exon	31612677	31612837	+	Parent=Cucumis_sativus_newGene_1380.7
chr1	StringTie	exon	31612693	31612837	+	Parent=Cucumis_sativus_newGene_1380.3
chr1	StringTie	exon	31612693	31613455	+	Parent=Cucumis_sativus_newGene_1380.4
chr1	StringTie	exon	31612727	31613455	+	Parent=Cucumis_sativus_newGene_1380.1
chr1	StringTie	exon	31612727	31612837	+	Parent=Cucumis_sativus_newGene_1380.5
chr1	StringTie	exon	31612727	31612990	+	Parent=Cucumis_sativus_newGene_1380.6
chr1	StringTie	exon	31612933	31613455	+	Parent=Cucumis_sativus_newGene_1380.2
chr1	StringTie	exon	31612933	31613455	+	Parent=Cucumis_sativus_newGene_1380.3
chr1	StringTie	exon	31612933	31613455	+	Parent=Cucumis_sativus_newGene_1380.5
chr1	StringTie	exon	31612933	31613455	+	Parent=Cucumis_sativus_newGene_1380.7
chr1	StringTie	exon	31613085	31613455	+	Parent=Cucumis_sativus_newGene_1380.6
chr1	StringTie	gene	31800594	31802301	+	ID=Cucumis_sativus_newGene_1381
chr1	StringTie	mRNA	31800594	31802301	+	ID=Cucumis_sativus_newGene_1381.1;Parent=Cucumis_sativus_newGene_1381
chr1	StringTie	exon	31800594	31800698	+	Parent=Cucumis_sativus_newGene_1381.1
chr1	StringTie	mRNA	31800594	31802301	+	ID=Cucumis_sativus_newGene_1381.2;Parent=Cucumis_sativus_newGene_1381
chr1	StringTie	exon	31800594	31800698	+	Parent=Cucumis_sativus_newGene_1381.2
chr1	StringTie	mRNA	31800594	31802301	+	ID=Cucumis_sativus_newGene_1381.3;Parent=Cucumis_sativus_newGene_1381
chr1	StringTie	exon	31800594	31800870	+	Parent=Cucumis_sativus_newGene_1381.3
chr1	StringTie	mRNA	31800594	31802301	+	ID=Cucumis_sativus_newGene_1381.4;Parent=Cucumis_sativus_newGene_1381
chr1	StringTie	exon	31800594	31800761	+	Parent=Cucumis_sativus_newGene_1381.4
chr1	StringTie	mRNA	31800601	31802301	+	ID=Cucumis_sativus_newGene_1381.5;Parent=Cucumis_sativus_newGene_1381
chr1	StringTie	exon	31800601	31801100	+	Parent=Cucumis_sativus_newGene_1381.5
chr1	StringTie	exon	31800785	31800870	+	Parent=Cucumis_sativus_newGene_1381.1
chr1	StringTie	exon	31800785	31800870	+	Parent=Cucumis_sativus_newGene_1381.2
chr1	StringTie	exon	31801048	31801100	+	Parent=Cucumis_sativus_newGene_1381.1
chr1	StringTie	exon	31801048	31801100	+	Parent=Cucumis_sativus_newGene_1381.2
chr1	StringTie	exon	31801048	31801100	+	Parent=Cucumis_sativus_newGene_1381.3
chr1	StringTie	exon	31801048	31801100	+	Parent=Cucumis_sativus_newGene_1381.4
chr1	StringTie	exon	31801901	31801985	+	Parent=Cucumis_sativus_newGene_1381.2
chr1	StringTie	exon	31802066	31802301	+	Parent=Cucumis_sativus_newGene_1381.1
chr1	StringTie	exon	31802066	31802301	+	Parent=Cucumis_sativus_newGene_1381.2
chr1	StringTie	exon	31802066	31802301	+	Parent=Cucumis_sativus_newGene_1381.3
chr1	StringTie	exon	31802066	31802301	+	Parent=Cucumis_sativus_newGene_1381.4
chr1	StringTie	exon	31802066	31802301	+	Parent=Cucumis_sativus_newGene_1381.5
chr1	StringTie	gene	32006287	32007983	+	ID=Cucumis_sativus_newGene_1382
chr1	StringTie	mRNA	32006287	32007983	+	ID=Cucumis_sativus_newGene_1382.1;Parent=Cucumis_sativus_newGene_1382
chr1	StringTie	exon	32006287	32006561	+	Parent=Cucumis_sativus_newGene_1382.1
chr1	StringTie	exon	32006675	32007020	+	Parent=Cucumis_sativus_newGene_1382.1
chr1	StringTie	exon	32007092	32007552	+	Parent=Cucumis_sativus_newGene_1382.1
chr1	StringTie	exon	32007644	32007983	+	Parent=Cucumis_sativus_newGene_1382.1
chr1	StringTie	gene	32090944	32096828	-	ID=Cucumis_sativus_newGene_1383
chr1	StringTie	mRNA	32090944	32096828	-	ID=Cucumis_sativus_newGene_1383.1;Parent=Cucumis_sativus_newGene_1383
chr1	StringTie	exon	32090944	32091419	-	Parent=Cucumis_sativus_newGene_1383.1
chr1	StringTie	mRNA	32091012	32096828	-	ID=Cucumis_sativus_newGene_1383.2;Parent=Cucumis_sativus_newGene_1383
chr1	StringTie	exon	32091012	32091419	-	Parent=Cucumis_sativus_newGene_1383.2
chr1	StringTie	exon	32091910	32091975	-	Parent=Cucumis_sativus_newGene_1383.1
chr1	StringTie	exon	32091910	32091975	-	Parent=Cucumis_sativus_newGene_1383.2
chr1	StringTie	exon	32093170	32093232	-	Parent=Cucumis_sativus_newGene_1383.1
chr1	StringTie	exon	32093170	32093232	-	Parent=Cucumis_sativus_newGene_1383.2
chr1	StringTie	exon	32093488	32093573	-	Parent=Cucumis_sativus_newGene_1383.1
chr1	StringTie	exon	32093488	32093573	-	Parent=Cucumis_sativus_newGene_1383.2
chr1	StringTie	exon	32094055	32094124	-	Parent=Cucumis_sativus_newGene_1383.1
chr1	StringTie	exon	32094055	32094124	-	Parent=Cucumis_sativus_newGene_1383.2
chr1	StringTie	exon	32094607	32094674	-	Parent=Cucumis_sativus_newGene_1383.2
chr1	StringTie	exon	32095272	32095347	-	Parent=Cucumis_sativus_newGene_1383.1
chr1	StringTie	exon	32095272	32095347	-	Parent=Cucumis_sativus_newGene_1383.2
chr1	StringTie	exon	32095792	32095838	-	Parent=Cucumis_sativus_newGene_1383.1
chr1	StringTie	exon	32095792	32095838	-	Parent=Cucumis_sativus_newGene_1383.2
chr1	StringTie	exon	32095933	32095997	-	Parent=Cucumis_sativus_newGene_1383.1
chr1	StringTie	exon	32095933	32095997	-	Parent=Cucumis_sativus_newGene_1383.2
chr1	StringTie	exon	32096460	32096536	-	Parent=Cucumis_sativus_newGene_1383.1
chr1	StringTie	exon	32096460	32096536	-	Parent=Cucumis_sativus_newGene_1383.2
chr1	StringTie	exon	32096625	32096828	-	Parent=Cucumis_sativus_newGene_1383.1
chr1	StringTie	exon	32096625	32096828	-	Parent=Cucumis_sativus_newGene_1383.2
chr1	StringTie	gene	32221984	32226087	+	ID=Cucumis_sativus_newGene_1385
chr1	StringTie	mRNA	32221984	32226087	+	ID=Cucumis_sativus_newGene_1385.1;Parent=Cucumis_sativus_newGene_1385
chr1	StringTie	exon	32221984	32222209	+	Parent=Cucumis_sativus_newGene_1385.1
chr1	StringTie	mRNA	32221994	32226087	+	ID=Cucumis_sativus_newGene_1385.2;Parent=Cucumis_sativus_newGene_1385
chr1	StringTie	exon	32221994	32222209	+	Parent=Cucumis_sativus_newGene_1385.2
chr1	StringTie	exon	32223297	32223547	+	Parent=Cucumis_sativus_newGene_1385.2
chr1	StringTie	exon	32225536	32226087	+	Parent=Cucumis_sativus_newGene_1385.1
chr1	StringTie	exon	32225536	32226087	+	Parent=Cucumis_sativus_newGene_1385.2
chr1	StringTie	gene	32244137	32246348	-	ID=Cucumis_sativus_newGene_1387
chr1	StringTie	mRNA	32244137	32246348	-	ID=Cucumis_sativus_newGene_1387.1;Parent=Cucumis_sativus_newGene_1387
chr1	StringTie	exon	32244137	32244422	-	Parent=Cucumis_sativus_newGene_1387.1
chr1	StringTie	mRNA	32244137	32246348	-	ID=Cucumis_sativus_newGene_1387.3;Parent=Cucumis_sativus_newGene_1387
chr1	StringTie	exon	32244137	32245758	-	Parent=Cucumis_sativus_newGene_1387.3
chr1	StringTie	mRNA	32244137	32246348	-	ID=Cucumis_sativus_newGene_1387.4;Parent=Cucumis_sativus_newGene_1387
chr1	StringTie	exon	32244137	32244422	-	Parent=Cucumis_sativus_newGene_1387.4
chr1	StringTie	mRNA	32244182	32246348	-	ID=Cucumis_sativus_newGene_1387.5;Parent=Cucumis_sativus_newGene_1387
chr1	StringTie	exon	32244182	32244422	-	Parent=Cucumis_sativus_newGene_1387.5
chr1	StringTie	exon	32244522	32244993	-	Parent=Cucumis_sativus_newGene_1387.4
chr1	StringTie	mRNA	32244522	32246348	-	ID=Cucumis_sativus_newGene_1387.6;Parent=Cucumis_sativus_newGene_1387
chr1	StringTie	exon	32244522	32245755	-	Parent=Cucumis_sativus_newGene_1387.6
chr1	StringTie	exon	32244939	32244993	-	Parent=Cucumis_sativus_newGene_1387.1
chr1	StringTie	exon	32244939	32244993	-	Parent=Cucumis_sativus_newGene_1387.5
chr1	StringTie	exon	32245688	32245758	-	Parent=Cucumis_sativus_newGene_1387.1
chr1	StringTie	exon	32245688	32245758	-	Parent=Cucumis_sativus_newGene_1387.4
chr1	StringTie	exon	32245688	32246348	-	Parent=Cucumis_sativus_newGene_1387.5
chr1	StringTie	mRNA	32245688	32246348	-	ID=Cucumis_sativus_newGene_1387.7;Parent=Cucumis_sativus_newGene_1387
chr1	StringTie	exon	32245688	32245758	-	Parent=Cucumis_sativus_newGene_1387.7
chr1	StringTie	exon	32246057	32246348	-	Parent=Cucumis_sativus_newGene_1387.7
chr1	StringTie	exon	32246086	32246348	-	Parent=Cucumis_sativus_newGene_1387.1
chr1	StringTie	exon	32246086	32246348	-	Parent=Cucumis_sativus_newGene_1387.3
chr1	StringTie	exon	32246086	32246348	-	Parent=Cucumis_sativus_newGene_1387.4
chr1	StringTie	exon	32246086	32246348	-	Parent=Cucumis_sativus_newGene_1387.6
chr1	StringTie	gene	32263387	32265145	+	ID=Cucumis_sativus_newGene_1388
chr1	StringTie	mRNA	32263387	32265145	+	ID=Cucumis_sativus_newGene_1388.1;Parent=Cucumis_sativus_newGene_1388
chr1	StringTie	exon	32263387	32263404	+	Parent=Cucumis_sativus_newGene_1388.1
chr1	StringTie	mRNA	32263778	32265145	+	ID=Cucumis_sativus_newGene_1388.2;Parent=Cucumis_sativus_newGene_1388
chr1	StringTie	exon	32263778	32263797	+	Parent=Cucumis_sativus_newGene_1388.2
chr1	StringTie	mRNA	32263958	32265145	+	ID=Cucumis_sativus_newGene_1388.3;Parent=Cucumis_sativus_newGene_1388
chr1	StringTie	exon	32263958	32264070	+	Parent=Cucumis_sativus_newGene_1388.3
chr1	StringTie	exon	32263971	32264070	+	Parent=Cucumis_sativus_newGene_1388.1
chr1	StringTie	exon	32263971	32264070	+	Parent=Cucumis_sativus_newGene_1388.2
chr1	StringTie	exon	32264506	32265145	+	Parent=Cucumis_sativus_newGene_1388.3
chr1	StringTie	exon	32264860	32265145	+	Parent=Cucumis_sativus_newGene_1388.1
chr1	StringTie	exon	32264909	32265145	+	Parent=Cucumis_sativus_newGene_1388.2
chr1	StringTie	gene	32345955	32347965	+	ID=Cucumis_sativus_newGene_1389
chr1	StringTie	mRNA	32345955	32347965	+	ID=Cucumis_sativus_newGene_1389.1;Parent=Cucumis_sativus_newGene_1389
chr1	StringTie	exon	32345955	32346690	+	Parent=Cucumis_sativus_newGene_1389.1
chr1	StringTie	exon	32347110	32347965	+	Parent=Cucumis_sativus_newGene_1389.1
chr1	StringTie	gene	32567332	32568576	+	ID=Cucumis_sativus_newGene_1391
chr1	StringTie	mRNA	32567332	32568576	+	ID=Cucumis_sativus_newGene_1391.1;Parent=Cucumis_sativus_newGene_1391
chr1	StringTie	exon	32567332	32567881	+	Parent=Cucumis_sativus_newGene_1391.1
chr1	StringTie	exon	32567975	32568576	+	Parent=Cucumis_sativus_newGene_1391.1
chr1	StringTie	gene	32569467	32572155	+	ID=Cucumis_sativus_newGene_1392
chr1	StringTie	mRNA	32569467	32572155	+	ID=Cucumis_sativus_newGene_1392.1;Parent=Cucumis_sativus_newGene_1392
chr1	StringTie	exon	32569467	32569775	+	Parent=Cucumis_sativus_newGene_1392.1
chr1	StringTie	exon	32570586	32572155	+	Parent=Cucumis_sativus_newGene_1392.1
chr2	StringTie	gene	135434	138520	-	ID=Cucumis_sativus_newGene_1399
chr2	StringTie	mRNA	135434	138520	-	ID=Cucumis_sativus_newGene_1399.1;Parent=Cucumis_sativus_newGene_1399
chr2	StringTie	exon	135434	136453	-	Parent=Cucumis_sativus_newGene_1399.1
chr2	StringTie	exon	136720	138520	-	Parent=Cucumis_sativus_newGene_1399.1
chr2	StringTie	gene	140385	150839	-	ID=Cucumis_sativus_newGene_1400
chr2	StringTie	mRNA	140385	150839	-	ID=Cucumis_sativus_newGene_1400.1;Parent=Cucumis_sativus_newGene_1400
chr2	StringTie	exon	140385	140889	-	Parent=Cucumis_sativus_newGene_1400.1
chr2	StringTie	mRNA	140473	141158	-	ID=Cucumis_sativus_newGene_1400.12;Parent=Cucumis_sativus_newGene_1400
chr2	StringTie	exon	140473	140889	-	Parent=Cucumis_sativus_newGene_1400.12
chr2	StringTie	mRNA	140694	150839	-	ID=Cucumis_sativus_newGene_1400.23;Parent=Cucumis_sativus_newGene_1400
chr2	StringTie	exon	140694	140889	-	Parent=Cucumis_sativus_newGene_1400.23
chr2	StringTie	mRNA	140789	150839	-	ID=Cucumis_sativus_newGene_1400.34;Parent=Cucumis_sativus_newGene_1400
chr2	StringTie	exon	140789	140889	-	Parent=Cucumis_sativus_newGene_1400.34
chr2	StringTie	mRNA	140820	150839	-	ID=Cucumis_sativus_newGene_1400.45;Parent=Cucumis_sativus_newGene_1400
chr2	StringTie	exon	140820	140889	-	Parent=Cucumis_sativus_newGene_1400.45
chr2	StringTie	exon	141030	141158	-	Parent=Cucumis_sativus_newGene_1400.12
chr2	StringTie	mRNA	142095	150839	-	ID=Cucumis_sativus_newGene_1400.2;Parent=Cucumis_sativus_newGene_1400
chr2	StringTie	exon	142095	142862	-	Parent=Cucumis_sativus_newGene_1400.2
chr2	StringTie	mRNA	142095	150839	-	ID=Cucumis_sativus_newGene_1400.3;Parent=Cucumis_sativus_newGene_1400
chr2	StringTie	exon	142095	142862	-	Parent=Cucumis_sativus_newGene_1400.3
chr2	StringTie	mRNA	142095	150839	-	ID=Cucumis_sativus_newGene_1400.4;Parent=Cucumis_sativus_newGene_1400
chr2	StringTie	exon	142095	142862	-	Parent=Cucumis_sativus_newGene_1400.4
chr2	StringTie	mRNA	142095	150839	-	ID=Cucumis_sativus_newGene_1400.49;Parent=Cucumis_sativus_newGene_1400
chr2	StringTie	exon	142095	142862	-	Parent=Cucumis_sativus_newGene_1400.49
chr2	StringTie	mRNA	142095	150839	-	ID=Cucumis_sativus_newGene_1400.5;Parent=Cucumis_sativus_newGene_1400
chr2	StringTie	exon	142095	142862	-	Parent=Cucumis_sativus_newGene_1400.5
chr2	StringTie	mRNA	142095	150839	-	ID=Cucumis_sativus_newGene_1400.50;Parent=Cucumis_sativus_newGene_1400
chr2	StringTie	exon	142095	142862	-	Parent=Cucumis_sativus_newGene_1400.50
chr2	StringTie	mRNA	142095	150839	-	ID=Cucumis_sativus_newGene_1400.51;Parent=Cucumis_sativus_newGene_1400
chr2	StringTie	exon	142095	142862	-	Parent=Cucumis_sativus_newGene_1400.51
chr2	StringTie	mRNA	142095	150839	-	ID=Cucumis_sativus_newGene_1400.52;Parent=Cucumis_sativus_newGene_1400
chr2	StringTie	exon	142095	142862	-	Parent=Cucumis_sativus_newGene_1400.52
chr2	StringTie	mRNA	142095	150839	-	ID=Cucumis_sativus_newGene_1400.6;Parent=Cucumis_sativus_newGene_1400
chr2	StringTie	exon	142095	142862	-	Parent=Cucumis_sativus_newGene_1400.6
chr2	StringTie	mRNA	142111	150839	-	ID=Cucumis_sativus_newGene_1400.10;Parent=Cucumis_sativus_newGene_1400
chr2	StringTie	exon	142111	142862	-	Parent=Cucumis_sativus_newGene_1400.10
chr2	StringTie	mRNA	142111	150839	-	ID=Cucumis_sativus_newGene_1400.11;Parent=Cucumis_sativus_newGene_1400
chr2	StringTie	exon	142111	142862	-	Parent=Cucumis_sativus_newGene_1400.11
chr2	StringTie	mRNA	142111	150839	-	ID=Cucumis_sativus_newGene_1400.13;Parent=Cucumis_sativus_newGene_1400
chr2	StringTie	exon	142111	142862	-	Parent=Cucumis_sativus_newGene_1400.13
chr2	StringTie	mRNA	142111	150839	-	ID=Cucumis_sativus_newGene_1400.7;Parent=Cucumis_sativus_newGene_1400
chr2	StringTie	exon	142111	142862	-	Parent=Cucumis_sativus_newGene_1400.7
[truncated: 12,034 more rows]

## Sheet: Table S4
Table S4. Standard curve in plant hormone detection.
Component Name	Abbr.	ESI Mode	Transition	RT (min)	Peak area
					0.01 μg/ml	0.05 μg/ml	0.1 μg/ml	0.5 μg/ml	1 μg/ml	2 μg/ml
isopentenyladenine riboside	IPR	Positive	336.2/136.1	5.35	383279	6.98566e+06	1.5979e+07	4.07547e+07	5.35247e+07	6.15323e+07
Abscisic acid	ABA	Negitive	263.1/153.1	4.1	14803	301599	755328	3.38129e+06	7.20409e+06	1.25084e+07
Brassinolide	BR	Positive	481.3/361.2	7.93	636.875	5459.12	18360.5	91976.2	223318	380649
Dihydrozeatin	DZ	Positive	222/136	4.02	2706.38	55914.4	111021	752505	1.67195e+06	3.36536e+06
Gibberellin A1	GA1	Negitive	347/273	3.84	NA	N/A	331	2316.38	4963.5	11083.4
Gibberellin A3	GA3	Negitive	345.1/239.1	3.87	1432.38	11746.2	30271.6	122581	256419	522950
Gibberellin A7	GA7	Negitive	329/211	4.96	N/A	330.875	1323.5	6782.25	13731.2	25968.9
Indole-3-acetic acid	IAA	Positive	176/130	3.44	8435.87	149996	414972	1.14983e+06	2.35657e+06	6.4028e+06
3-Indolebutyric acid	IBA	Positive	204/186	4.4	7800.12	42347.9	108191	566095	1.1103e+06	1.99462e+06
Indole-3-carboxaldehyde	ICA	Positive	146/118	5.54	43373.1	189652	480698	2.179e+06	4.32174e+06	6.99722e+06
N6-Isopentenyladenine	IP	Positive	204/135.862	5.4	141504	2.1785e+06	4.85357e+06	1.53838e+07	2.11098e+07	2.6285e+07
Jasmonoyl-L-Isoleucine	JA-ILE	Positive	324.4/132.1	5.25	9709	144255	364782	1.70794e+06	3.97396e+06	7.907e+06
Methyl indole-3-acetate	MeIAA	Positive	190.1/129.9	7.09	48246.8	307283	866335	3.7599e+06	7.10817e+06	1.13725e+07
Salicylic acid	SA	Negitive	137/92.8	3.53	2865	21835	71712.9	262046	566490	1.01618e+06
trans-Zeatin	TZ	Positive	220.2/148	3.91	31041.7	601013	1.51933e+06	6.42992e+06	1.1553e+07	1.59998e+07
trans-Zeatin-riboside	ZR	Positive	352/220	4.03	60336.9	830898	2.11448e+06	5.59171e+06	8.71319e+06	1.07817e+07
Methylsalicylate	MESA	Negitive	151/123	7.77	636.625	661.5	1820	6451.88	8601.38	18527.6

## Sheet: Table S5
Table S5. Quanlity control in plant hormone detection.
Component Name	Abbr.	ESI Mode	Transition	RT (min)	QC-01 1	QC-02 1	QC-03 1	QC-RSD
isopentenyladenine riboside	IPR	Positive	336.2/136.1	5.35	59386.2	63198.4	62637.9	0.0272205
Abscisic acid	ABA	Negitive	263.1/153.1	4.1	86596.9	91839.9	88981.9	0.0240449
Brassinolide	BR	Positive	481.3/361.2	7.93	1114	1114.25	1273.75	0.0644615
Dihydrozeatin	DZ	Positive	222/136	4.02	1910.5	1955.25	2252.62	0.0744485
3-Indolebutyric acid	IBA	Positive	204/186	4.4	4785.38	5570.12	5252.62	0.0619507
N6-Isopentenyladenine	IP	Positive	204/135.862	5.4	62557	66215.1	88814.6	0.160104
Jasmonoyl-L-Isoleucine	JA-ILE	Positive	324.4/132.1	5.25	9073.3	12097	11300.9	0.118231
1 Peak area.
